# Supplementary material for: Genome-wide association study of rice (Oryza sativa L.) leaf traits with a high-throughput leaf scorer
Source: PubMed Central journal article supplement (PMC4585412; doi:10.1093/jxb/erv100), 2015-03-20
Supplement: supp_erv100_jexbot136952_file001.pdf [file supp_erv100_jexbot136952_file001.pdf]

**Supplementary figures list:**

**Supplementary Figure S1. The experimental arrangement of the rice material.**

**Supplementary Figure S2. The operational procedure of the HLS system.**

**Supplementary Figure S3. The data management of the HLS system.**

**Supplementary Figure S4. The HLS measurements for the rice leaf color of each batch (50 leaves) belonging to (a) group 2, (b) group 3, and (c) group 4.**

**Supplementary Figure S5. Genome-wide association studies of 6 (leaf size related) traits at three different growth stages.**

**Supplementary Figure S6. Genome-wide association studies of 7 (leaf color related) traits at three different growth stages.**

**Supplementary Figure S7. Genome-wide association studies of 16 (leaf shape-related) traits at three different growth stages.**

**Supplementary Figure S8. Scatter plots of leaf shape measurements versus green leaf area measurements at three growth stages.**

**Supplementary Figure S9. Scatter plots of average leaf width measurements versus average leaf perimeter area ratio measurements at three growth stages.**

**Supplementary Figure S10. GWAS results for three leaf traits in three different (sub)populations.**

**Supplementary Notes list:**

**1. Image acquisition**

**2. Image correcting**

**3. Image processing**

**4. The predefined segmentation values in HSL color space.**

**5. The hardware control protocol and the source code of PLC.**

**6. Associated lead SNPs of loci linked to known genes.**

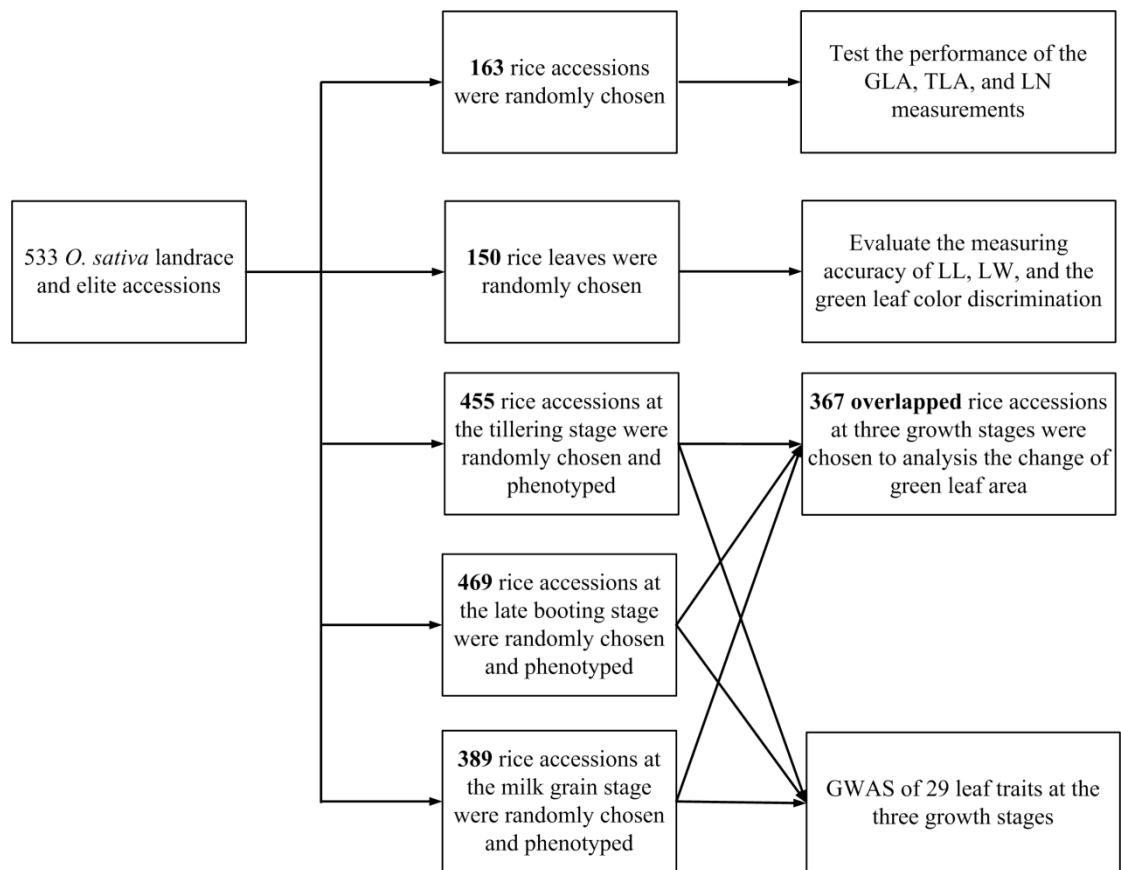

**Supplementary Figure S1. The experimental arrangement of the rice material.** The growth stages of the 533 accessions were not synchronous, and the inspection task was finished within one month at each growth stage, thus not all rice accessions were phenotyped with the HLS system. A total of 455, 469, and 389 rice accessions at late tillering stage, late booting stage, and milk grain stage, respectively, were phenotyped.

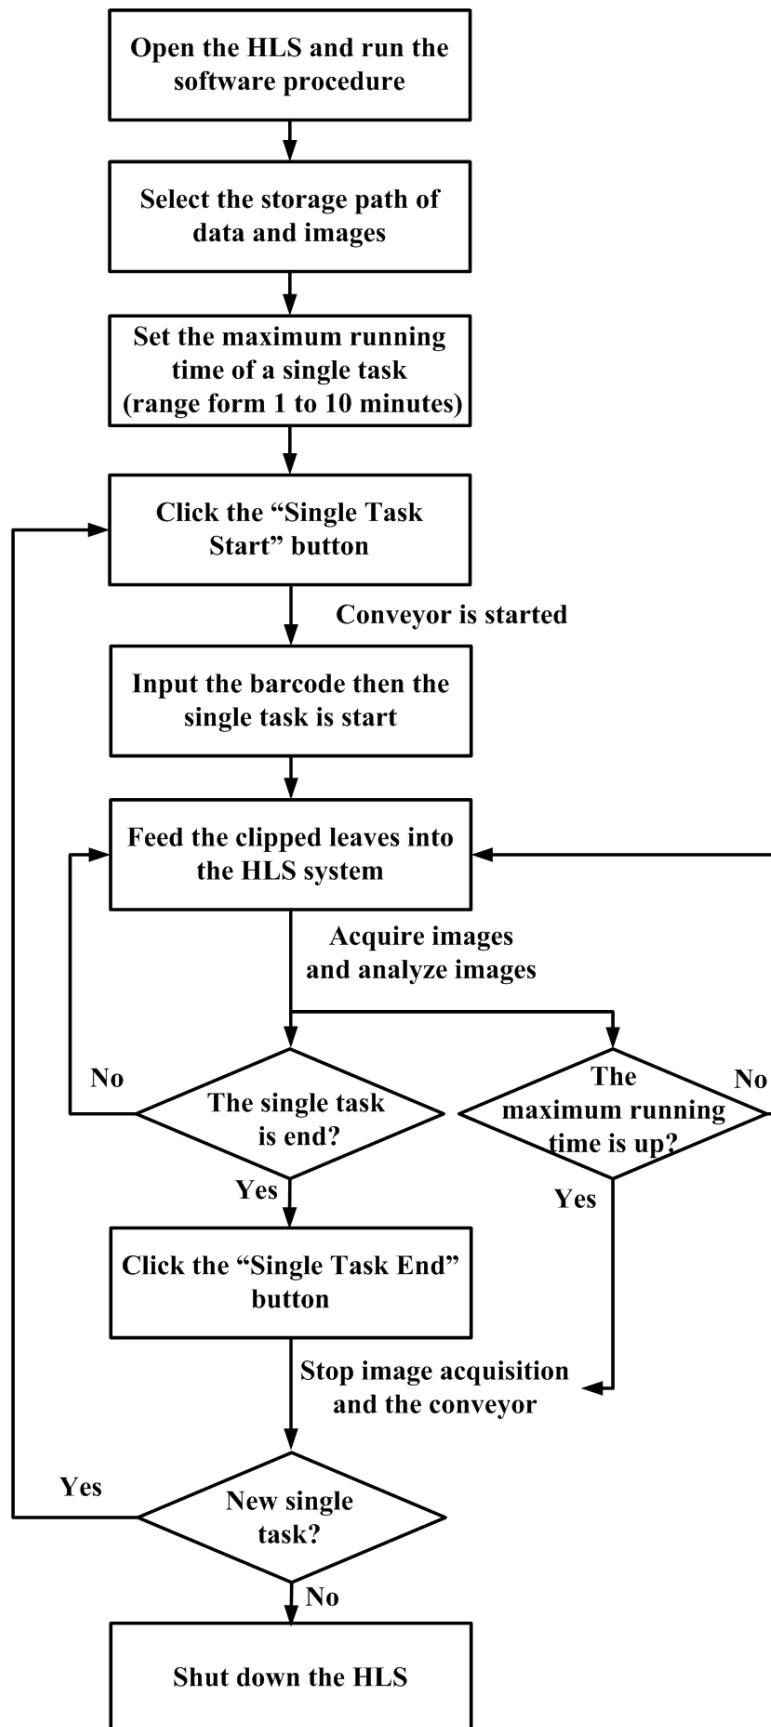

Supplementary Figure S2. The operational procedure of the HLS system includes the following

steps: (1) open the HLS and run the software procedure; (2) select the storage path for data and images; (3) set the maximum running time of a single task (the optional range is from 1 to 10 minutes; typically 5 minutes is suitable for an individual rice plant); (4) click the "Single Task Start" button on the right side of the HLS (Fig. 1b) to start the conveyor; (5) enter the barcode to begin the camera scan and transmit the images to the workstation; (6) feed in all the leaves for a single task using the feeding device; (7) after all the leaves are fed and scanned, click the "Single Task End" button on the software interface; and (8) when all the tasks are finished, click the "STOP" button on the software interface.

### High-throughput Leaf Scorer

| Barcode | Green Leaf Area (mm <sup>2</sup> ) | Yellow Leaf Area (mm <sup>2</sup> ) | Total Leaf Area (mm <sup>2</sup> ) | Green Leaf Area Ratio | Green-2 Leaf Area (mm <sup>2</sup> ) | Green-2 Leaf Area ratio | Green-3 Leaf Area (mm <sup>2</sup> ) | Green-3 Leaf Area ratio | Green-4 Leaf Area (mm <sup>2</sup> ) | Green-4 Leaf Area ratio |
|---------|------------------------------------|-------------------------------------|------------------------------------|-----------------------|--------------------------------------|-------------------------|--------------------------------------|-------------------------|--------------------------------------|-------------------------|
| 1       | 178194                             | 33786                               | 211980                             | 84.06%                | 47209                                | 26.49%                  | 117667                               | 66.03%                  | 13318                                | 7.47%                   |
| 2       | 165333                             | 664                                 | 165997                             | 99.60%                | 219                                  | 0.13%                   | 11833                                | 7.16%                   | 153281                               | 92.71%                  |
| 3       | 126872                             | 32912                               | 159783                             | 79.40%                | 66477                                | 52.40%                  | 58779                                | 46.33%                  | 1615                                 | 1.27%                   |
| 4       | 104874                             | 6781                                | 111656                             | 93.93%                | 16601                                | 15.83%                  | 56141                                | 53.53%                  | 32133                                | 30.64%                  |
| 5       | 117940                             | 15238                               | 133178                             | 88.56%                | 506                                  | 0.43%                   | 63151                                | 53.55%                  | 54282                                | 46.03%                  |
| 6       | 184897                             | 7039                                | 191936                             | 96.33%                | 2490                                 | 1.35%                   | 92939                                | 50.27%                  | 89467                                | 48.39%                  |
| 7       | 83698                              | 7637                                | 91335                              | 91.64%                | 22360                                | 26.72%                  | 55561                                | 66.38%                  | 5776                                 | 6.90%                   |
| 8       | 66120                              | 7039                                | 73159                              | 90.38%                | 602                                  | 0.91%                   | 30700                                | 46.43%                  | 34818                                | 52.66%                  |
| 9       | 103554                             | 1766                                | 105319                             | 98.32%                | 10711                                | 10.34%                  | 88810                                | 85.76%                  | 4032                                 | 3.89%                   |
| 10      | 106295                             | 955                                 | 107250                             | 99.11%                | 494                                  | 0.46%                   | 20420                                | 19.21%                  | 85381                                | 80.32%                  |
| 11      | 62174                              | 8771                                | 70944                              | 87.64%                | 381                                  | 0.61%                   | 33940                                | 54.59%                  | 27852                                | 44.80%                  |
| 12      | 178199                             | 3258                                | 181457                             | 98.20%                | 5104                                 | 2.86%                   | 45562                                | 25.57%                  | 127533                               | 71.57%                  |
| 13      | 232737                             | 5471                                | 238208                             | 97.70%                | 9134                                 | 3.92%                   | 148835                               | 63.95%                  | 74769                                | 32.13%                  |
| 14      | 101511                             | 684                                 | 102195                             | 99.33%                | 2249                                 | 2.22%                   | 56958                                | 56.11%                  | 42304                                | 41.67%                  |
| 15      | 132435                             | 419                                 | 132854                             | 99.68%                | 210                                  | 0.16%                   | 5909                                 | 4.46%                   | 126316                               | 95.38%                  |
| 16      | 132017                             | 5020                                | 137037                             | 96.34%                | 4059                                 | 3.07%                   | 69465                                | 52.62%                  | 58493                                | 44.31%                  |
| 17      | 116566                             | 4931                                | 121497                             | 95.94%                | 118                                  | 0.10%                   | 16335                                | 14.01%                  | 100112                               | 85.88%                  |
| 18      | 149420                             | 9523                                | 158943                             | 94.01%                | 24249                                | 16.23%                  | 97238                                | 65.08%                  | 27933                                | 18.69%                  |
| 19      | 92967                              | 11161                               | 104128                             | 89.28%                | 7983                                 | 8.59%                   | 62285                                | 67.00%                  | 22699                                | 24.42%                  |
| 20      | 119440                             | 2200                                | 121640                             | 98.19%                | 727                                  | 0.61%                   | 32234                                | 26.99%                  | 86479                                | 72.40%                  |
| 21      | 62388                              | 2786                                | 65174                              | 95.73%                | 969                                  | 1.55%                   | 36933                                | 59.20%                  | 24487                                | 39.25%                  |
| 22      | 233315                             | 3221                                | 236535                             | 98.64%                | 16173                                | 6.93%                   | 136494                               | 58.50%                  | 80648                                | 34.57%                  |
| 23      | 277070                             | 2163                                | 279232                             | 99.23%                | 564                                  | 0.20%                   | 19765                                | 7.13%                   | 256741                               | 92.66%                  |
| 24      | 177821                             | 5202                                | 183023                             | 97.16%                | 4010                                 | 2.26%                   | 118963                               | 66.90%                  | 54847                                | 30.84%                  |
| 25      | 160731                             | 7925                                | 168656                             | 95.30%                | 4818                                 | 3.00%                   | 115361                               | 71.77%                  | 40551                                | 25.23%                  |

(a)

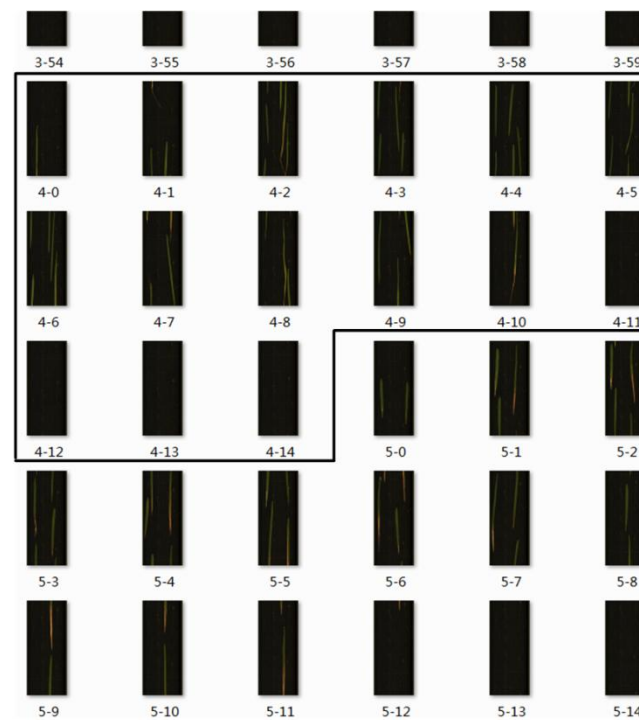

(b)

**Supplementary Figure S3. The data management of the HLS system.** (a) After the “Single Task End” button is clicked, the leaf traits (including barcode and whole leaf

traits) are automatically stored in an Excel file. (b) Along with barcode indexing, the scanned images from each task are automatically stored in the user-predefined folder.

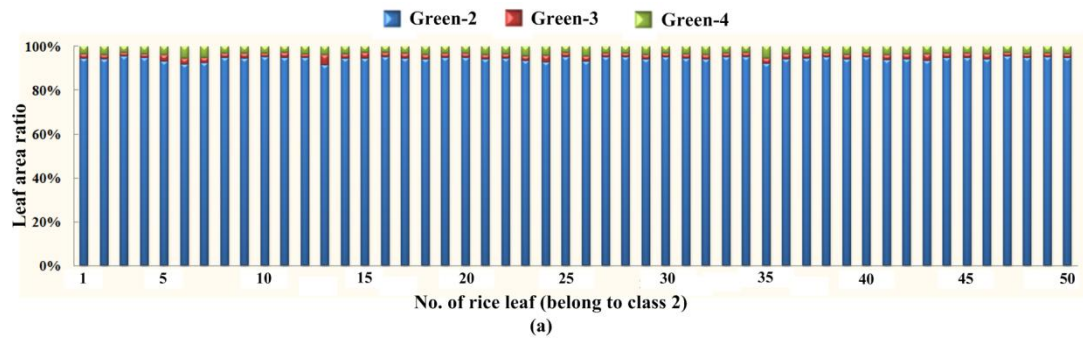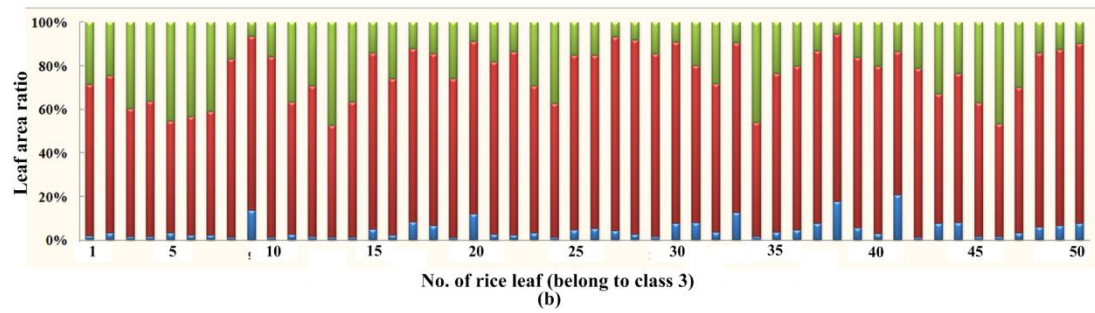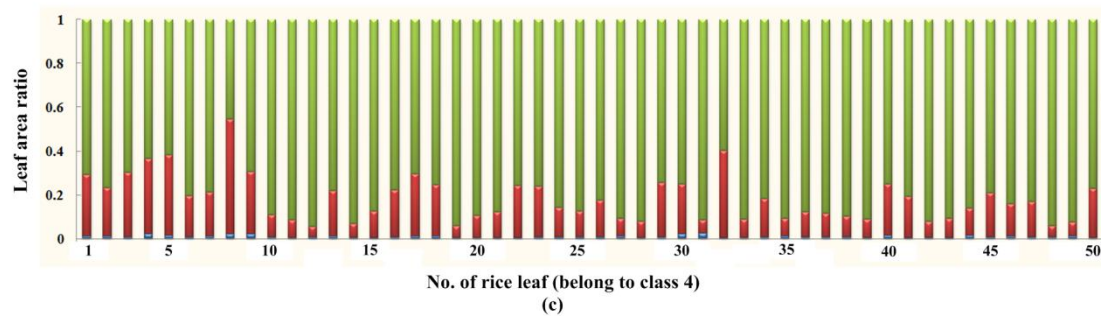

**Supplementary Figure S4. The HLS measurements for the rice leaf color of each batch (50 leaves)**

**belonging to (a) group 2, (b) group 3, and (c) group 4.**

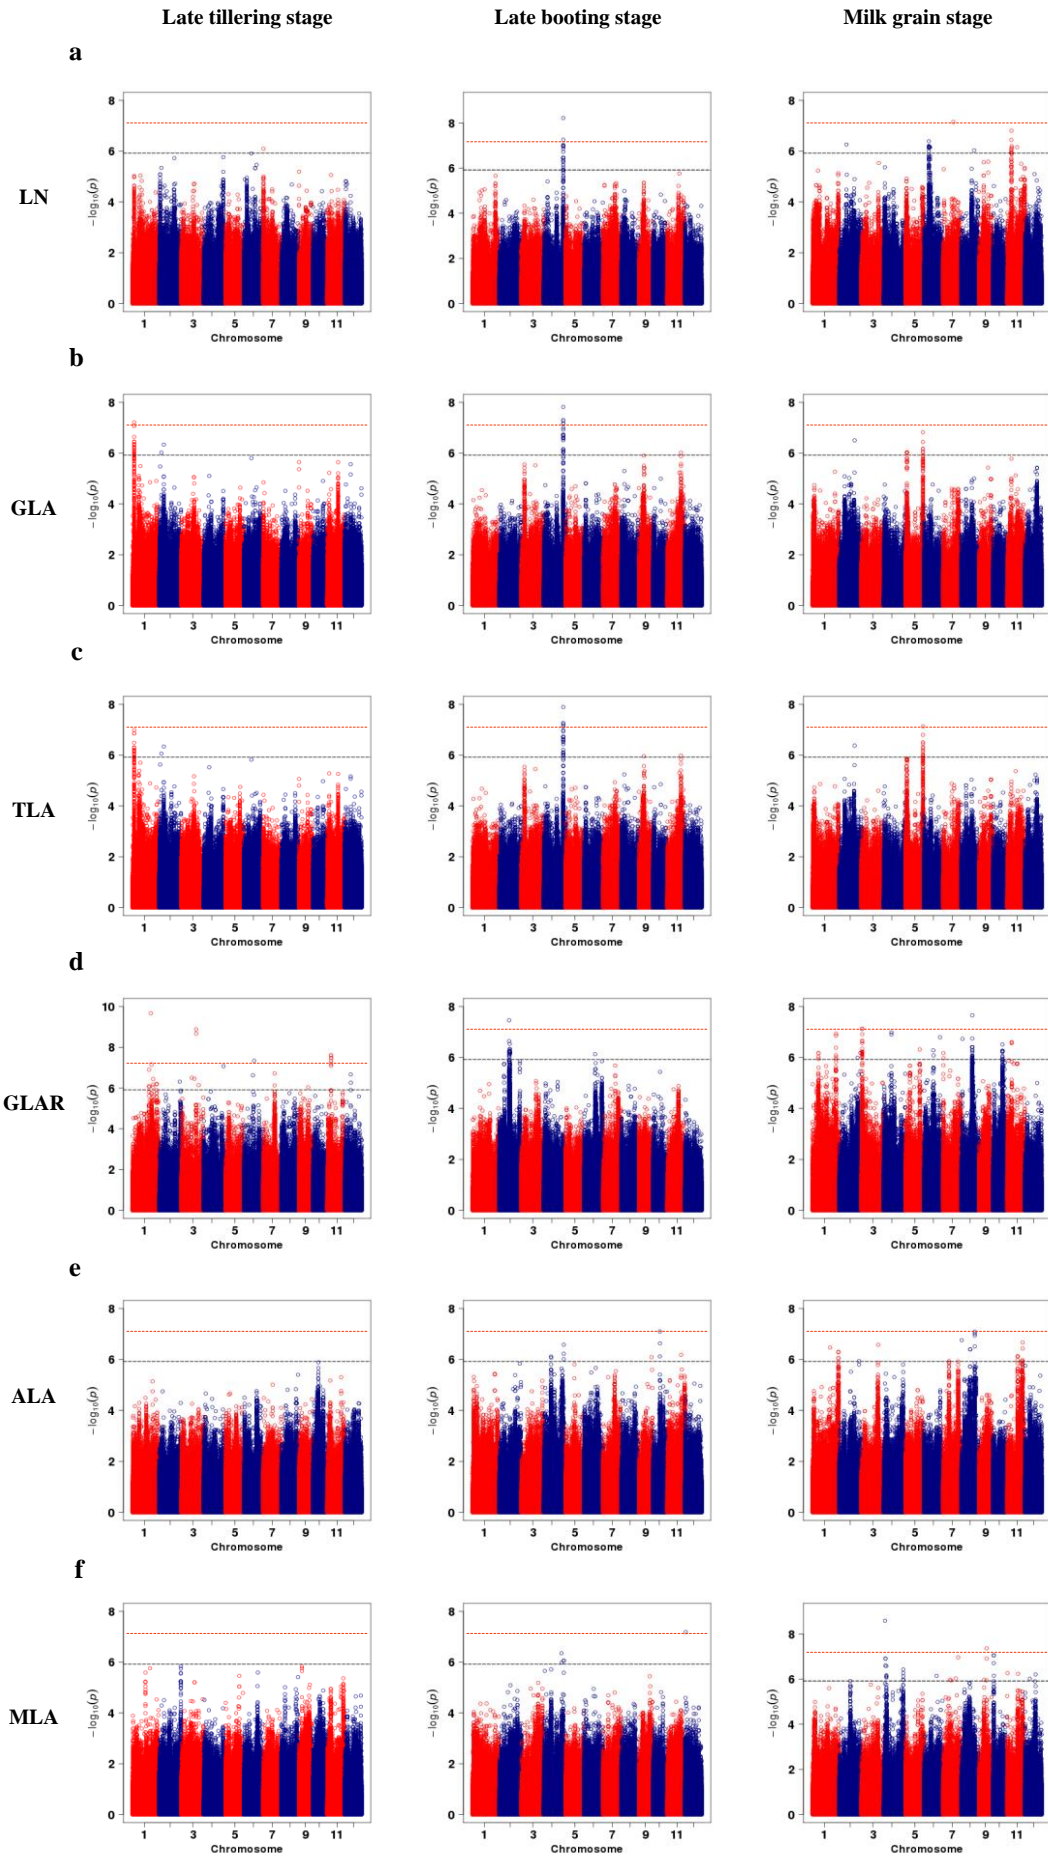

**Supplementary Figure S5. Genome-wide association studies of 6 (leaf size related) traits at three different growth stages.** Manhattan plots of LN (a), GLA (b), TLA (c), GLAR (d), ALA (e) and MLA (f) at late tillering stage (left), late booting stage (middle), and milk grain stage (right), respectively. The horizontal gray dashed line and red dashed line indicates the genome-wide suggestive threshold ( $P = 1.21 \times 10^{-6}$ ) and significant threshold ( $P = 6.03 \times 10^{-8}$ ), respectively.



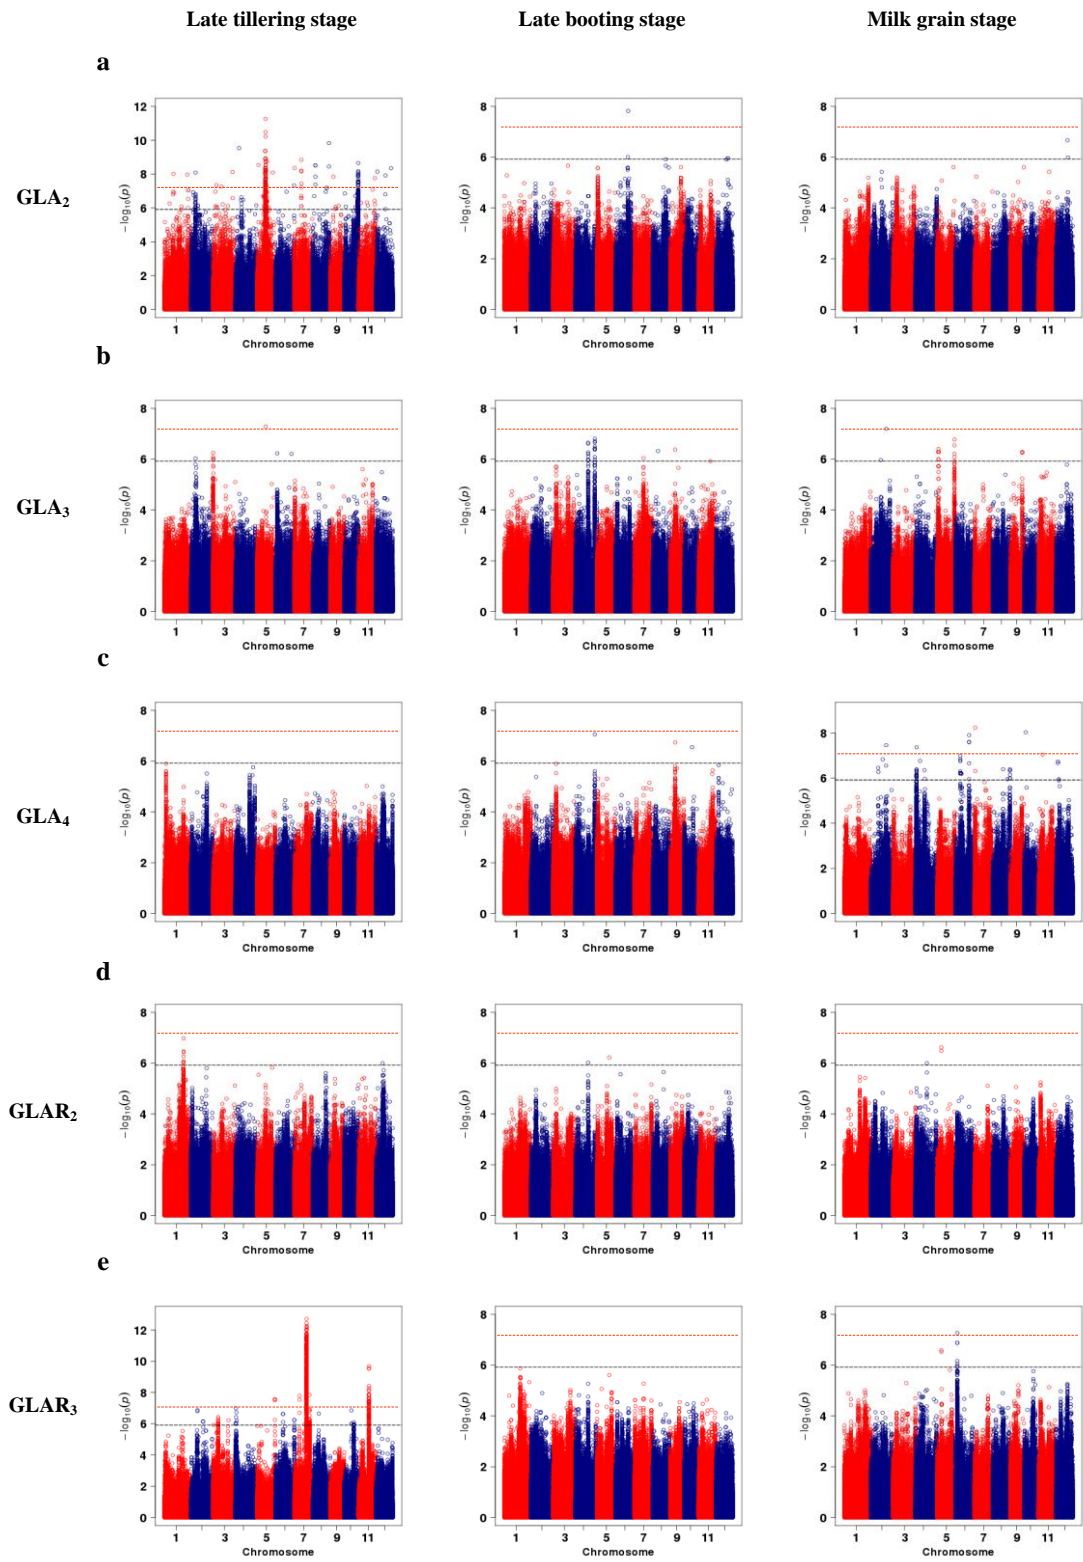

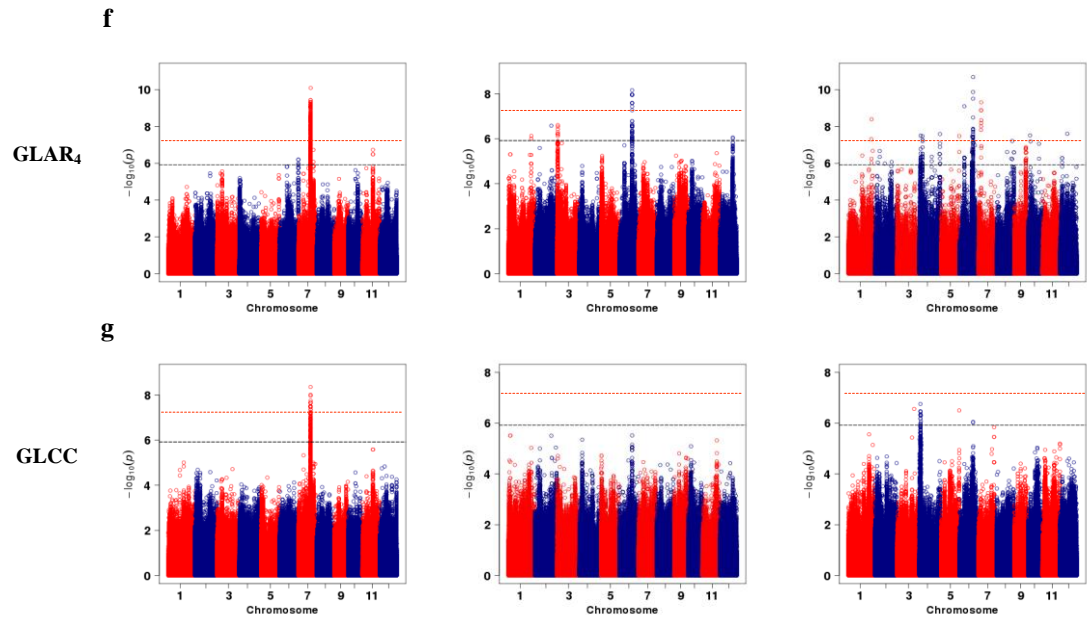

**Supplementary Figure S6. Genome-wide association studies of 7 (leaf color related) traits at three different growth stages.** Manhattan plots of GLA<sub>2</sub>(a), GLA<sub>3</sub>(b), GLA<sub>4</sub>(c), GLAR<sub>2</sub>(d), GLAR<sub>3</sub>(e), GLAR<sub>4</sub>(f), and GLCC(g) at late tillering stage (left), late booting stage (middle), and milk grain stage (right), respectively. The horizontal gray dashed line and red dashed line indicates the genome-wide suggestive threshold ( $P = 1.21 \times 10^{-6}$ ) and significant threshold ( $P = 6.03 \times 10^{-8}$ ), respectively.

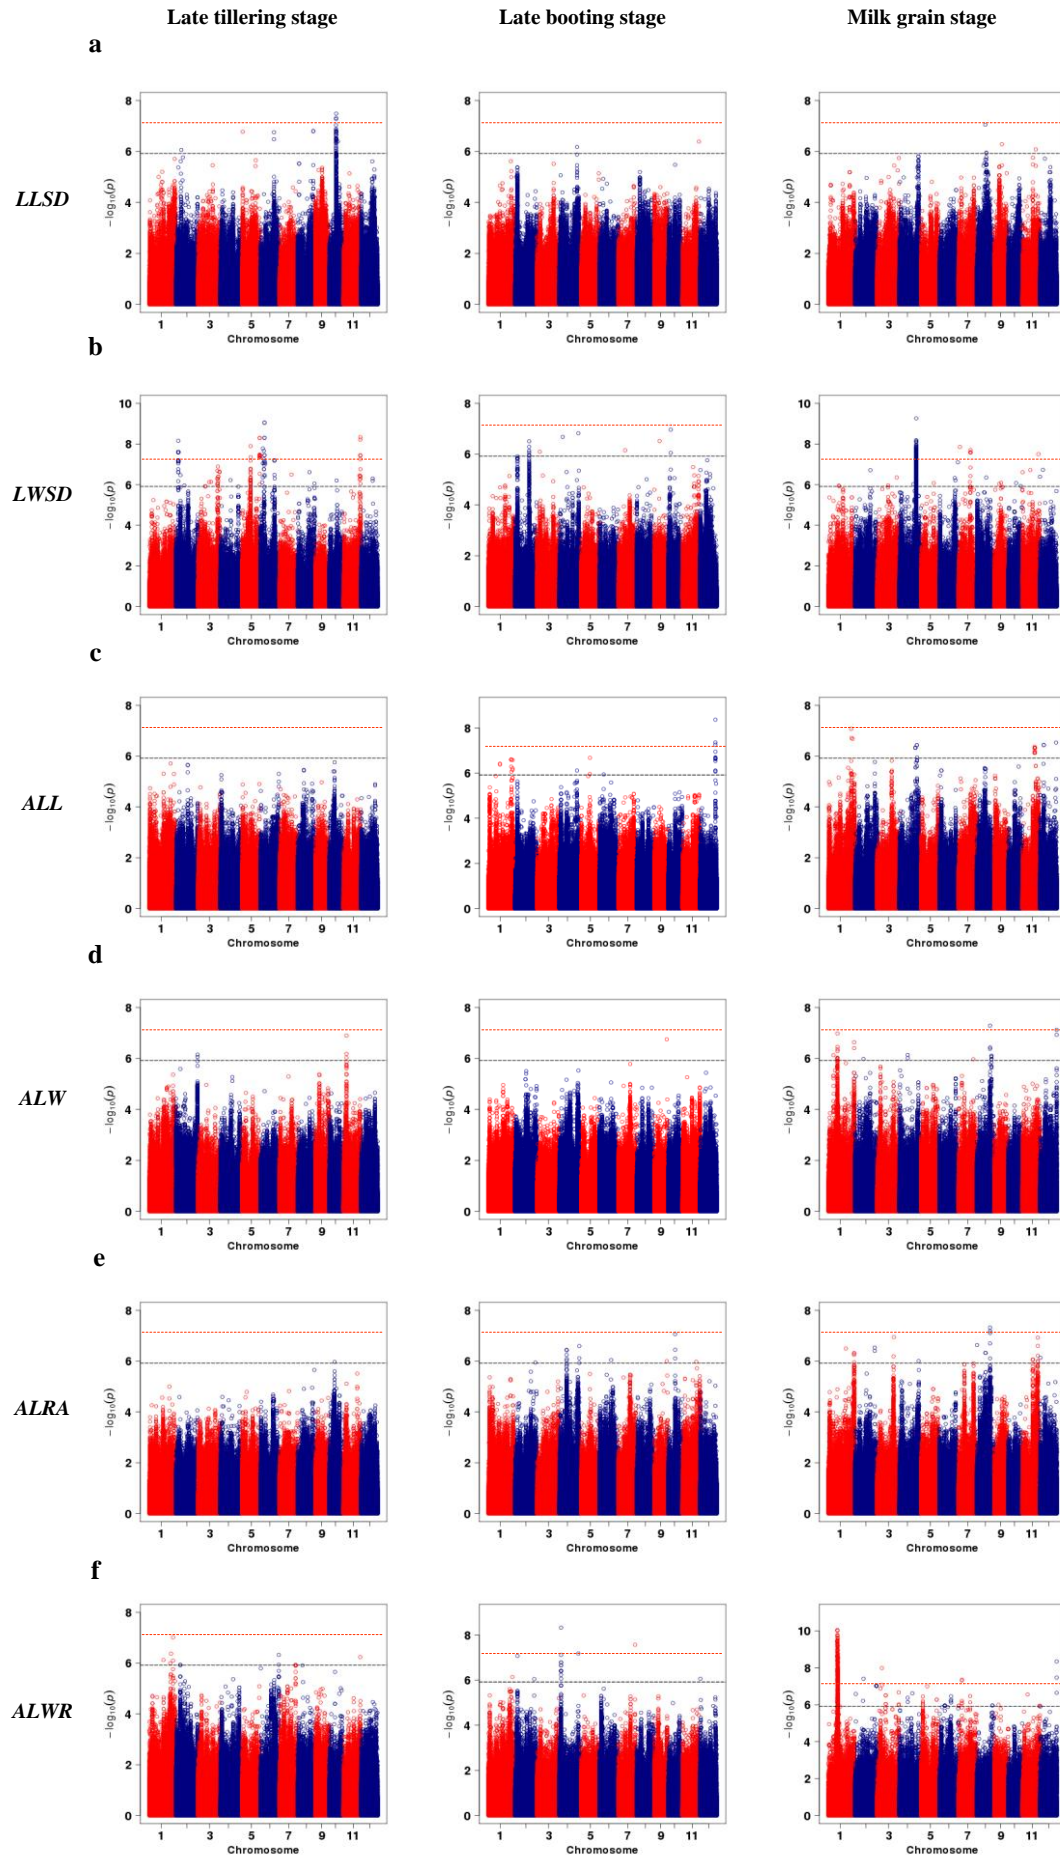

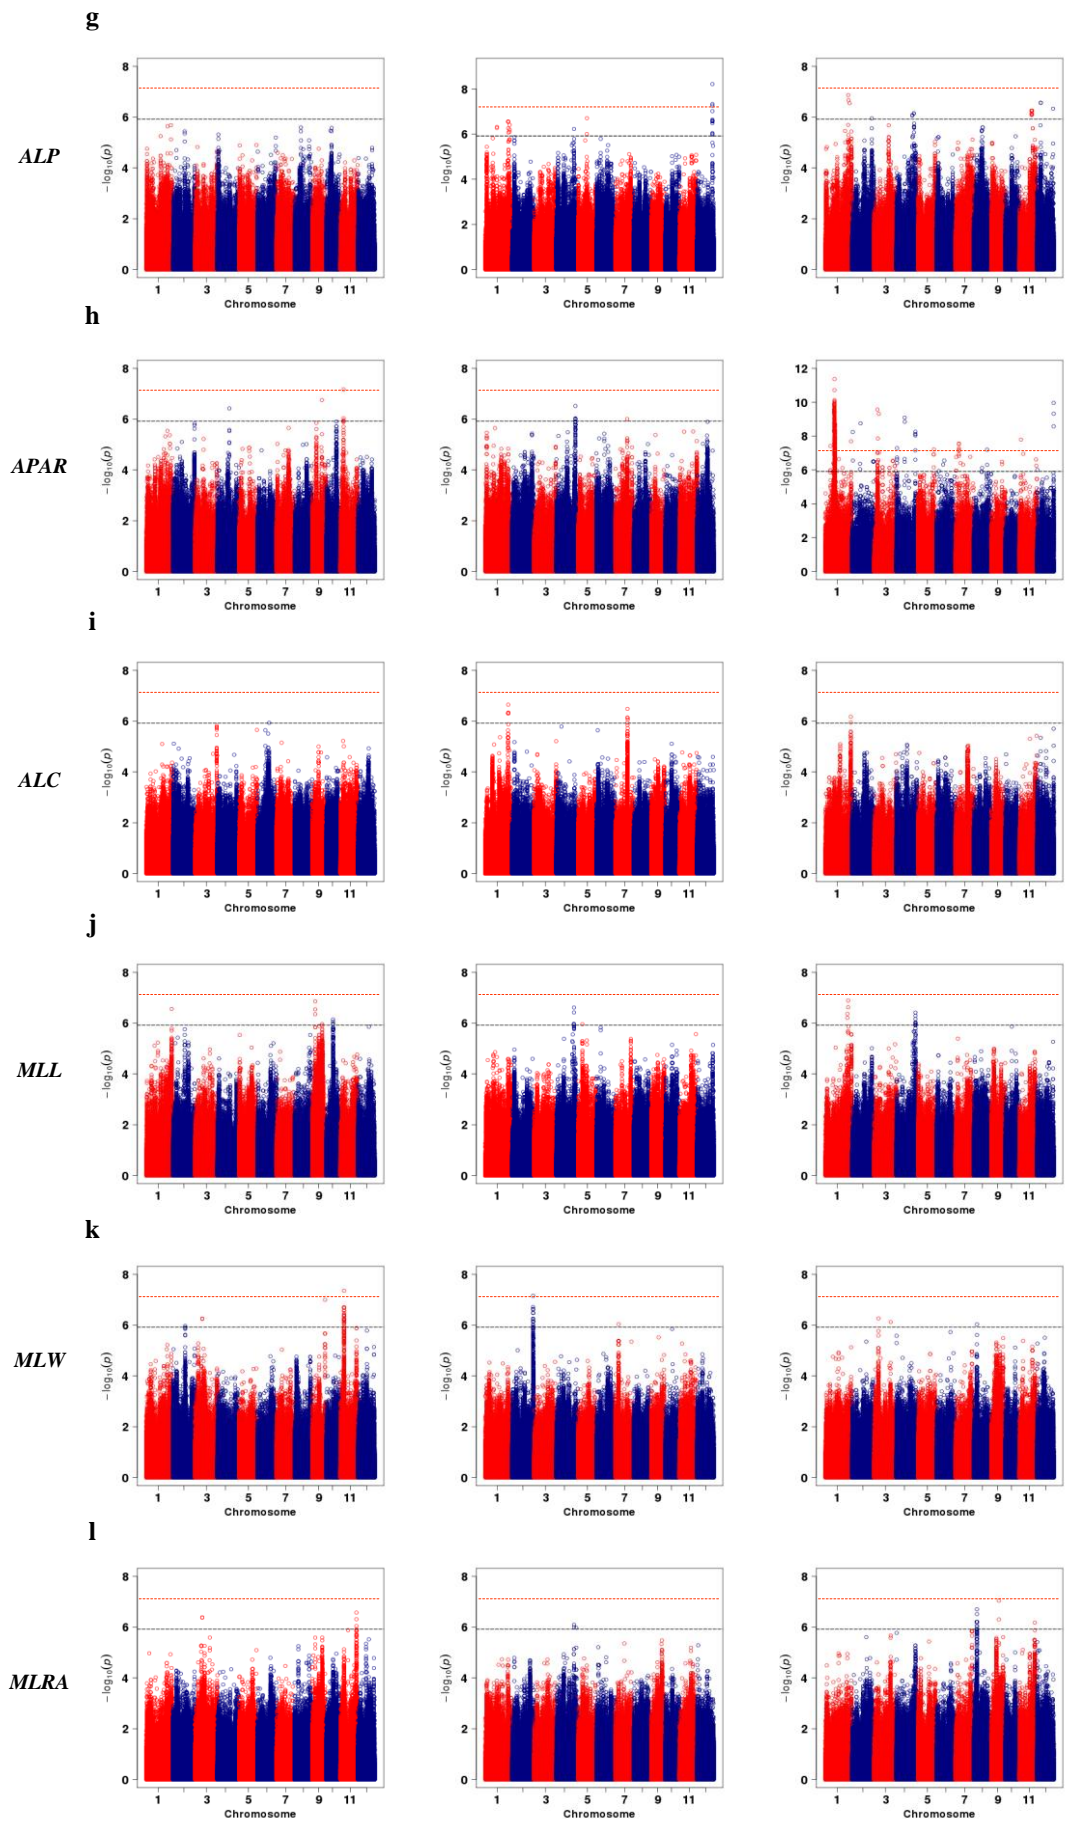

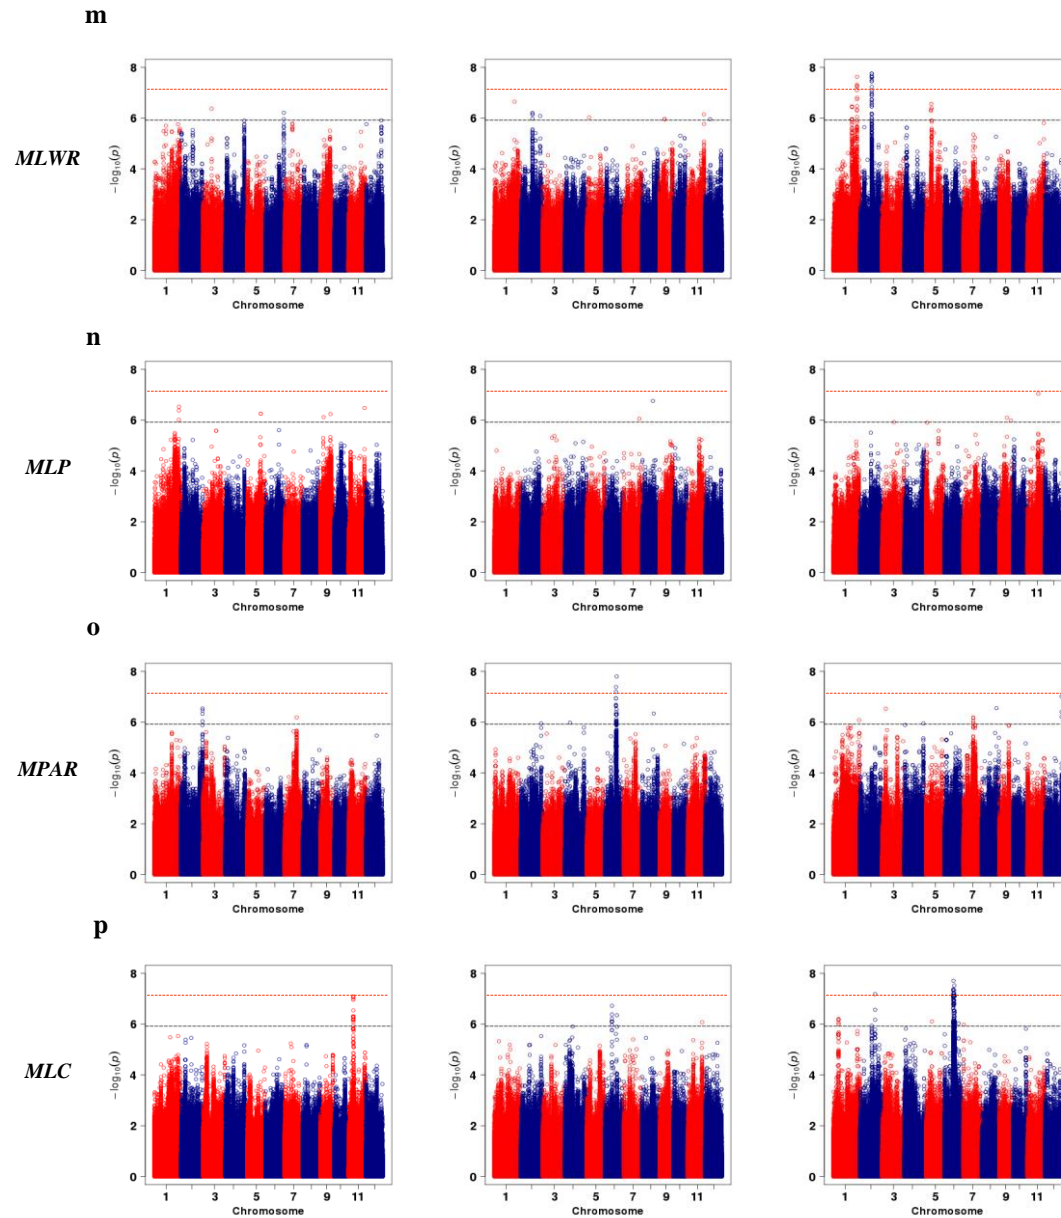

**Supplementary Figure S7. Genome-wide association studies of 16 (leaf shape-related) traits at three different growth stages.** Manhattan plots of LLSD(a), LWSD(b), ALL(c), ALW(d), ALRA(e), ALWR(f), ALP(g), APAR(h), ALC(i), MLL(j), MLW(k), MLRA(l), MLWR(m), MLP(n), MPAR(o), and MLC(p) at late tillering stage (left), late booting stage (middle), and milk grain stage (right), respectively. The horizontal gray dashed line and red dashed line indicates the genome-wide suggestive threshold ( $P = 1.21 \times 10^{-6}$ ) and significant threshold ( $P = 6.03 \times 10^{-8}$ ), respectively.



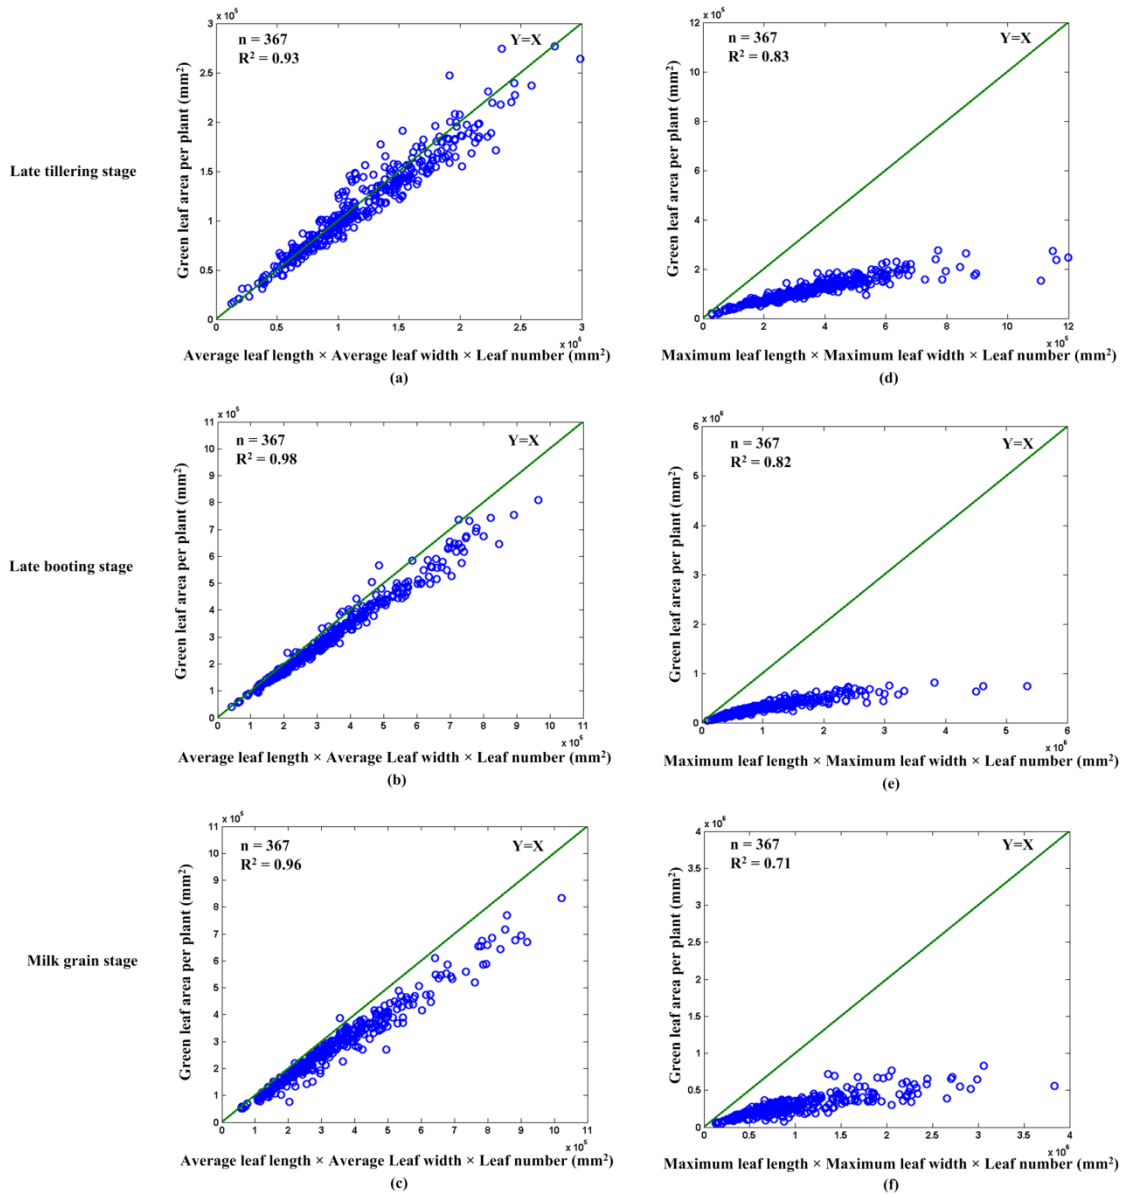

**Supplementary Figure S8. Scatter plots of leaf shape measurements versus green leaf area measurements at three growth stages.** The relation between the Average leaf length × Average leaf width × leaf number (ALWN) and the green leaf area per plant at (a) late tillering stage, (b) late booting stage, and (c) milk grain stage. The relation between the Maximum leaf length × Maximum leaf width × leaf number (MLWN) and the green leaf area per plant at (d) late tillering stage, (e) late booting stage, and (f) milk grain stage.

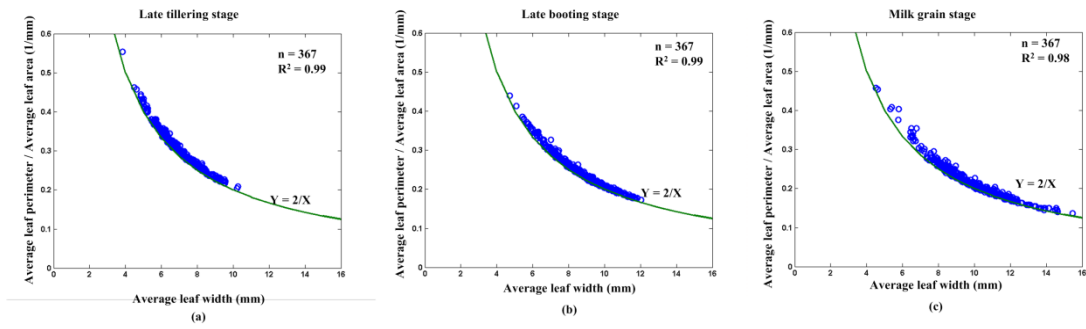

**Supplementary Figure S9. Scatter plots of average leaf width measurements versus average leaf perimeter area ratio measurements at three growth stages. (a) late tillering stage, (b) late booting stage, and (c) milk grain stage.**

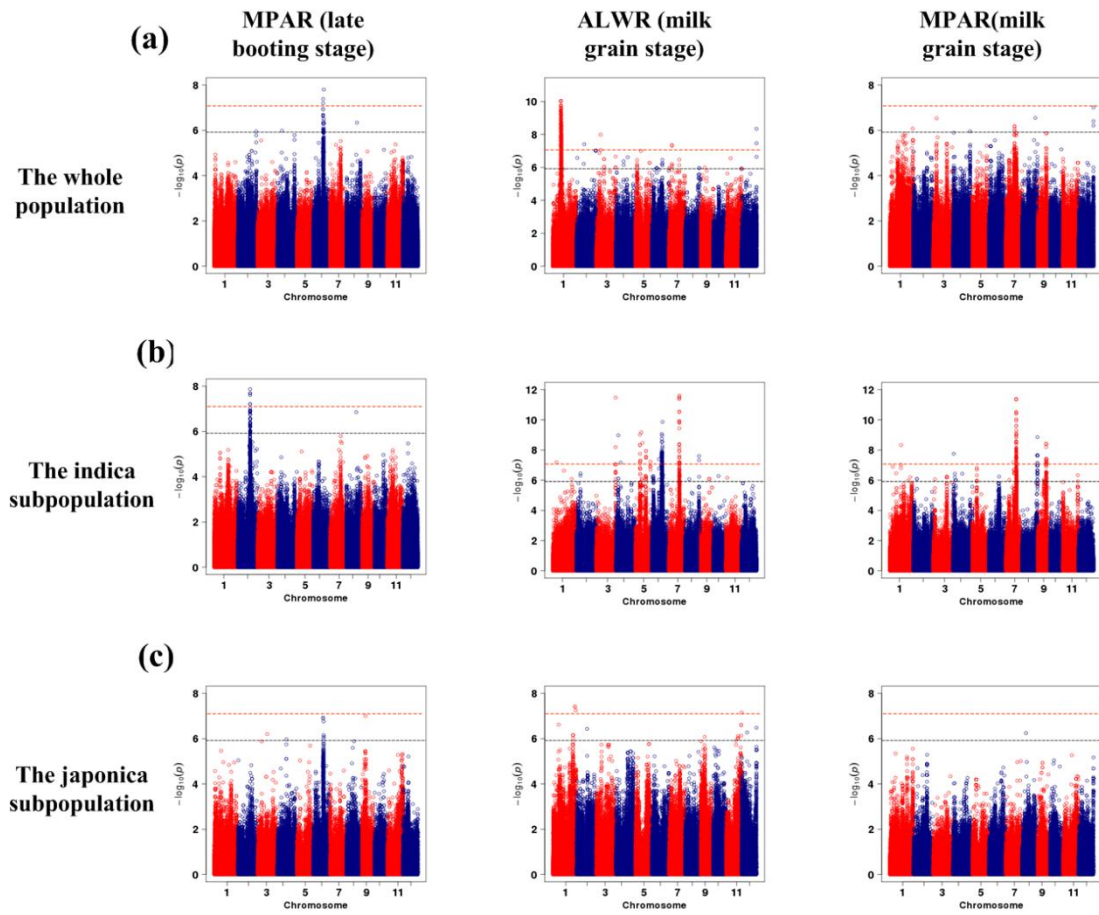

**Supplementary Figure S10. GWAS results for three leaf traits in three different (sub)populations.**

Manhattan plots of MPAR at late booting stage (left), ALWR at milk grain stage (middle), MPAR at milk grain stage (right) in the whole population (a), the *indica* subpopulation (b), and the *japonica* subpopulation (c). The horizontal gray dashed line and red dashed line indicates the genome-wide suggestive threshold ( $P = 1.21 \times 10^{-6}$ ) and significant threshold ( $P = 6.03 \times 10^{-8}$ ), respectively.



## Supplementary Notes

### 1. The source code and annotation of image acquisition

All the software, including image acquisition, image analysis, host-computer control, and human-computer interaction, was designed using LabVIEW (National Instruments Corporation, USA). The system is equipped with a camera-link image acquisition device (IMAQ PCI-1428, National Instruments Corporation, USA) and IMAQ Virtual Instruments (VI) library for LabVIEW. Once the “Single Task Start” button is clicked and the barcode is entered, color images ( $1280 \times 3000$ ) are continuously acquired and analyzed until the “Single Task End” button is clicked. By using a queue to cache the acquired images, the image analysis and image storage procedures parallel the image acquisition procedure, thus optimizing the measurement efficiency.

The procedure for image acquisition contains four main VI elements: IMAQ Grab Setup VI, IMAQ Grab Acquire VI, IMAQ Stop VI, and Enqueue Element VI. IMAQ Grab Setup VI is used to configure the parameters of camera acquisition (such as image size of a single frame, acquisition speed, and so on). IMAQ Grab Acquire VI is used to acquire a single frame of color image. When the single task has ended and the “Single Task End” button is clicked, IMAQ Stop VI is used to end the image acquisition. Here, using a queue to cache the acquired images (using Enqueue Element VI), the procedure of image analysis and image storage parallels the procedure of image acquisition, thus optimizing the measurement efficiency. The source code for image acquisition is shown in Supplementary Note Fig. N1.

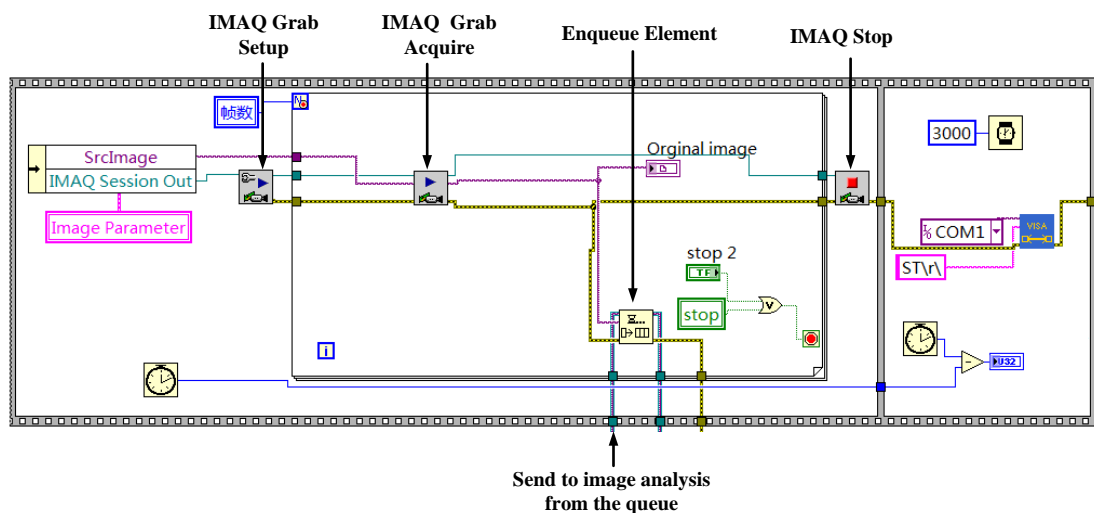

Fig. N1. The source code for image acquisition.

## 2. The source code and annotation of image correction

Three grayscale images (R, G, and B components) are extracted using IMAQ ExtractColorPlanes VI. With predefined values (7 and 14), the grayscale images of the G and B components are shifted up to be level with the position of the R grayscale image (IMAQ Shift VI). At last, the three grayscale images are merged back to a corrected RGB color image using IMAQ ReplaceColorPlane VI. The source code for image correction is shown in Supplementary Note Fig. N2 and Fig. N3.

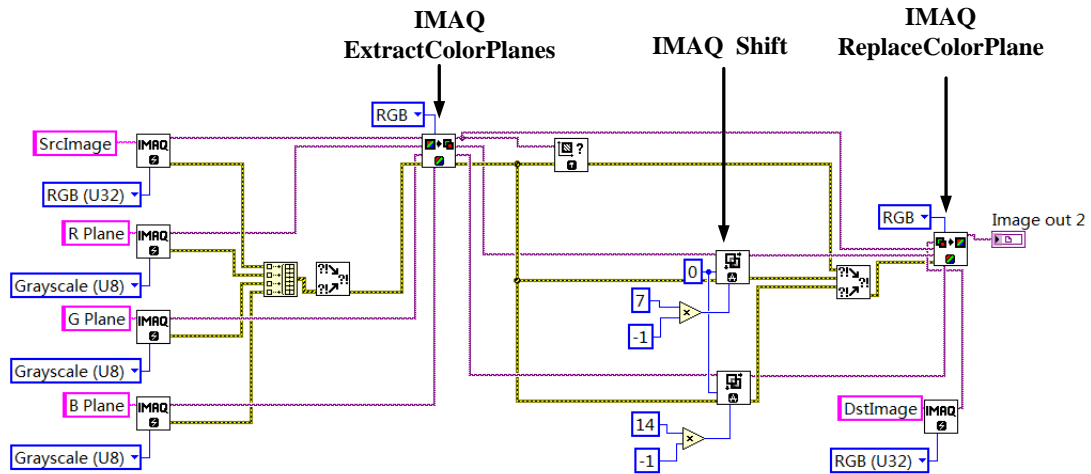

Fig. N2. The source code for image correction.

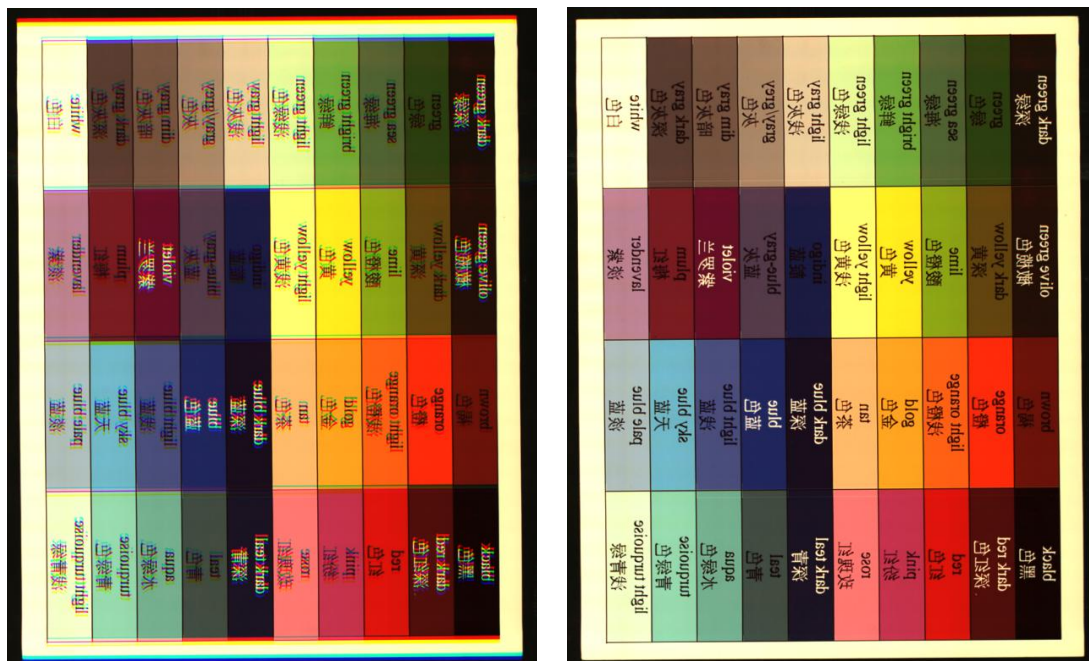

Fig. N3. Original color image acquired by color line-scan camera (left) and the corrected image (right) of a color checker.

### 3. The source code and annotation of image processing

After the RGB color image is corrected, the image reprocessing procedures include the following steps: (1) to eliminate the noise of the bilateral borders of the conveyor the left border (100 pixels, approximately 20 mm) and right border (100 pixels, approximately 20 mm) of the image are cut using a IMAQ Extract VI; (2) with the predefined segmentation values in HSL color space, the foreground regions of interest with impurities are extracted using IMAQ ColorThreshold VI; (3) a IMAQ RemoveParticle VI is used to remove the impurities; (4) then a IMAQ FillHole VI is used to fill the hole of the rice leaf; (5) after image cropping, the leaves part in the previous image, which are connected to the lower boundary, are cut and reconnected to the remaining leaves part of the current image. The source code of image preprocessing is demonstrated in Supplementary Note Fig. N4.

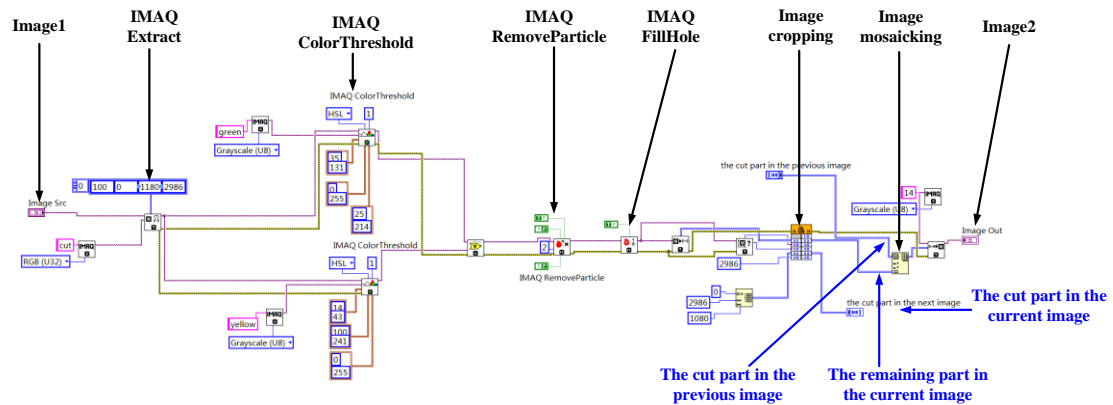

Fig. N4. The source code of image preprocessing with LabVIEW.

As some dust and dead leaf tip may appear on the mosaicking image, after removing the isolated pixels, the binary leaf image without impurities can be extracted. Then the leaf number and total leaf area can be extracted. The source code of removing impurities is demonstrated in Supplementary Note Fig. N5.

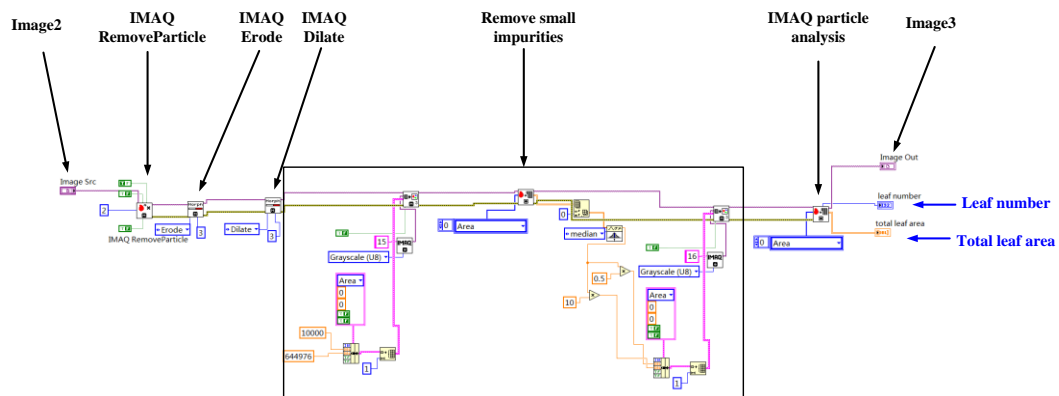

Fig. N5. The source code of removing impurities of mosaicking image with LabVIEW.

After the binary leaf image without impurities can be extracted, to ensure the accuracy of the leaf morphological traits extraction, some severe-curly leaves are rejected. Then the morphological traits of each leaf, including leaf length, leaf width, leaf perimeter, leaf area, and leaf compactness can be extracted. For example, using the modified hilditch thinning algorithm, the main path length can be obtained and count. And the real leaf length is determined by the path length and the spatial resolution of the inspection unit ( $0.22 \text{ mm/pixel}$ ). The source code of leaf morphological traits extraction is demonstrated in Supplementary Note Fig. N6.

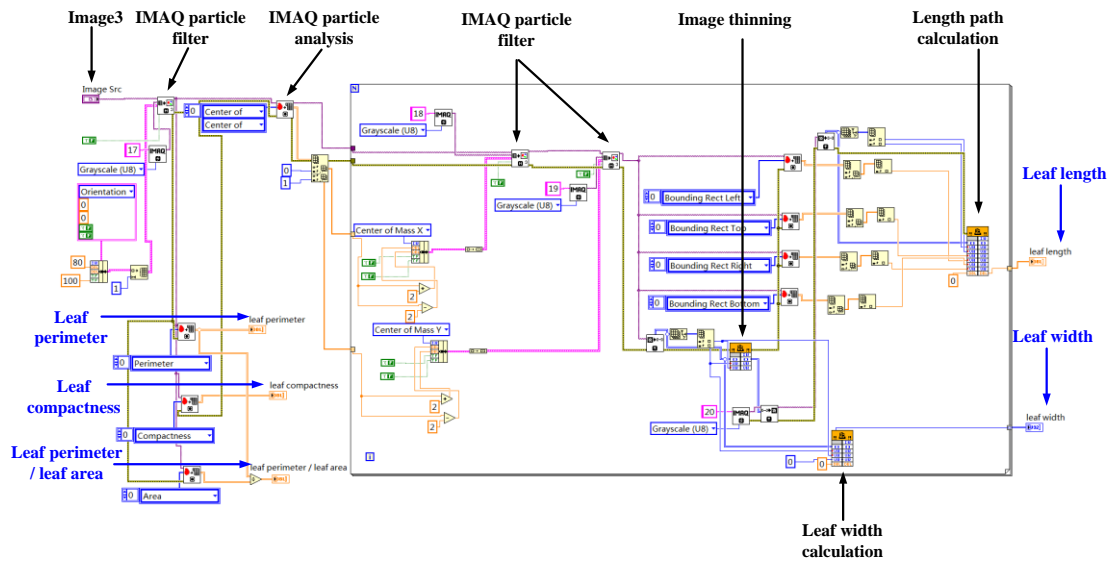

Fig. N6. The source code of leaf morphological traits extraction with LabVIEW.

After the images (Image1) are segmented with predefined values in HLS color space for green leaf area, the total leaf image without impurities (Image3) is also obtained as a mask for the subsequent extraction of GLA, GLA<sub>2</sub>, GLA<sub>3</sub>, and GLA<sub>4</sub>. Here, we use the extraction of GLA and GLA<sub>2</sub> as an example. In a subsequent step, the pure green (or green-2) leaf is determined by the set intersection of the mask and the segmented region with impurities. At last, the foreground pixel numbers of green leaf (or green-2 leaf) are counted, respectively. When the single task has ended (such as the total leaves of an individual plant have all been measured with the HLS), the leaf area is determined by the sum of pixel numbers of the current task and the spatial resolution of the inspection system ( $0.048 \text{ mm}^2/\text{pixel}$ ).

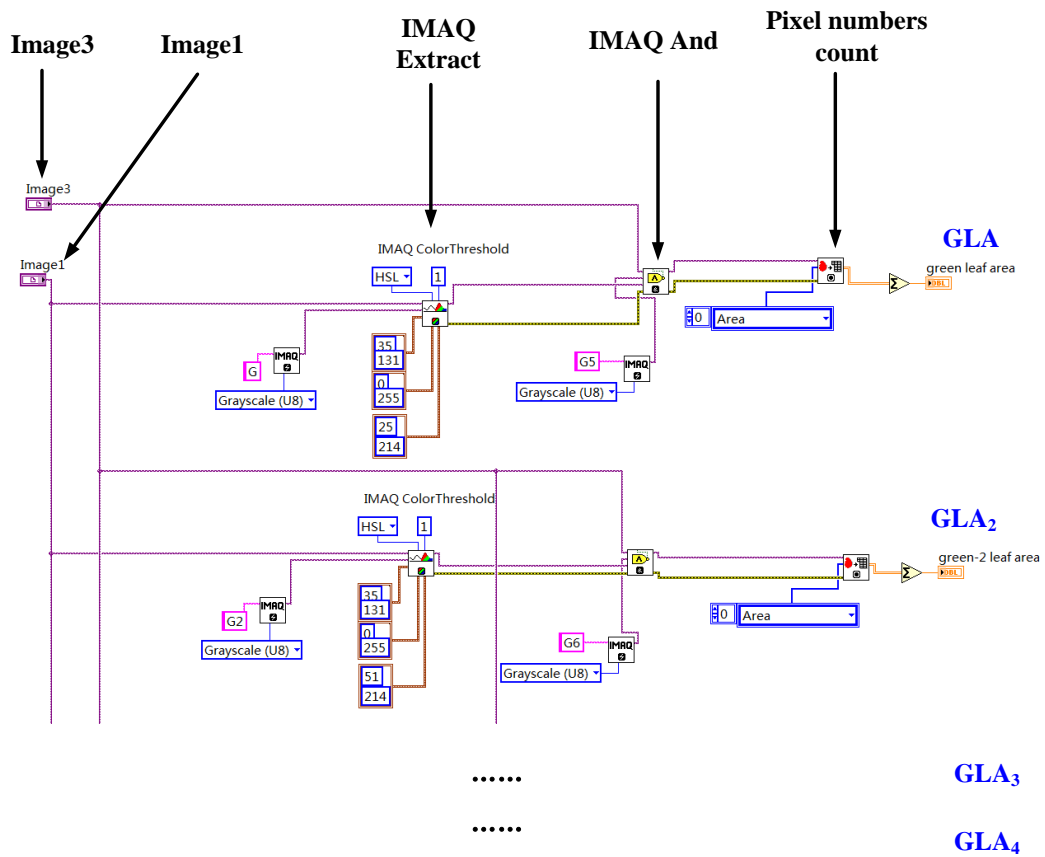

Fig. N7. The source code of leaf area extraction with LabVIEW.

**4. The predefined segmentation values in HSL color space are listed in Table N1.**

Table. N1. The hardware control protocol.

| Traits           | H threshold value | S threshold value | L threshold value |
|------------------|-------------------|-------------------|-------------------|
| GLA              | 35-131            | 0-255             | 25-214            |
| GLA <sub>2</sub> | 35-131            | 0-255             | 51-214            |
| GLA <sub>3</sub> | 35-131            | 0-255             | 38-50             |
| GLA <sub>4</sub> | 35-131            | 0-255             | 25-37             |
| YLA              | 14-43             | 100-241           | 100-255           |

**5. The hardware control protocol is listed in Table N2, and the source code of PLC is shown in**

**Fig. N8 and Fig. N9.** A programmable logic controller (PLC, CP1H-Y20DT-D, Omron Corporation, Japan) is adopted in the system to regulate the conveyor and communicate with the workstation. The conveyor is driven by a servo motor (MHMD042PIU, Panasonic Corporation, Japan) and a servo

driver (MBDDT2210003, Panasonic Corporation, Japan). The servo driver is controlled by the pulse output of the PLC, which controls the running speed, the acceleration speed, and the deceleration speed of the conveyor. To achieve host-computer control, the communication protocol between the workstation and the PLC should be predefined. The hardware control protocol and the source code of the PLC (as designed by CX-Programmer, Version 7.30, Omron Corporation, Japan) are described.

Table. N2. The hardware control protocol.

| Instruction from workstation | Instruction from PLC | The operation of "Single Task Start" button on the right side of the HLS | The operation of the software interface | Function                                                        |
|------------------------------|----------------------|--------------------------------------------------------------------------|-----------------------------------------|-----------------------------------------------------------------|
| "R?"                         | "OK"                 | -                                                                        | -                                       | Set the flag of system running                                  |
| "ST"                         | -                    | -                                                                        | -                                       | Stop the conveyor                                               |
| -                            | -                    | ON                                                                       | -                                       | Run the conveyor                                                |
| -                            | -                    | OFF                                                                      | -                                       | Stop the conveyor                                               |
| -                            | -                    | -                                                                        | After the barcode is input              | Start the continuous image acquisition and image analysis       |
| -                            | -                    | -                                                                        | After "Single Task End" is clicked      | Stop the image acquisition and send the instruction "ST" to PLC |

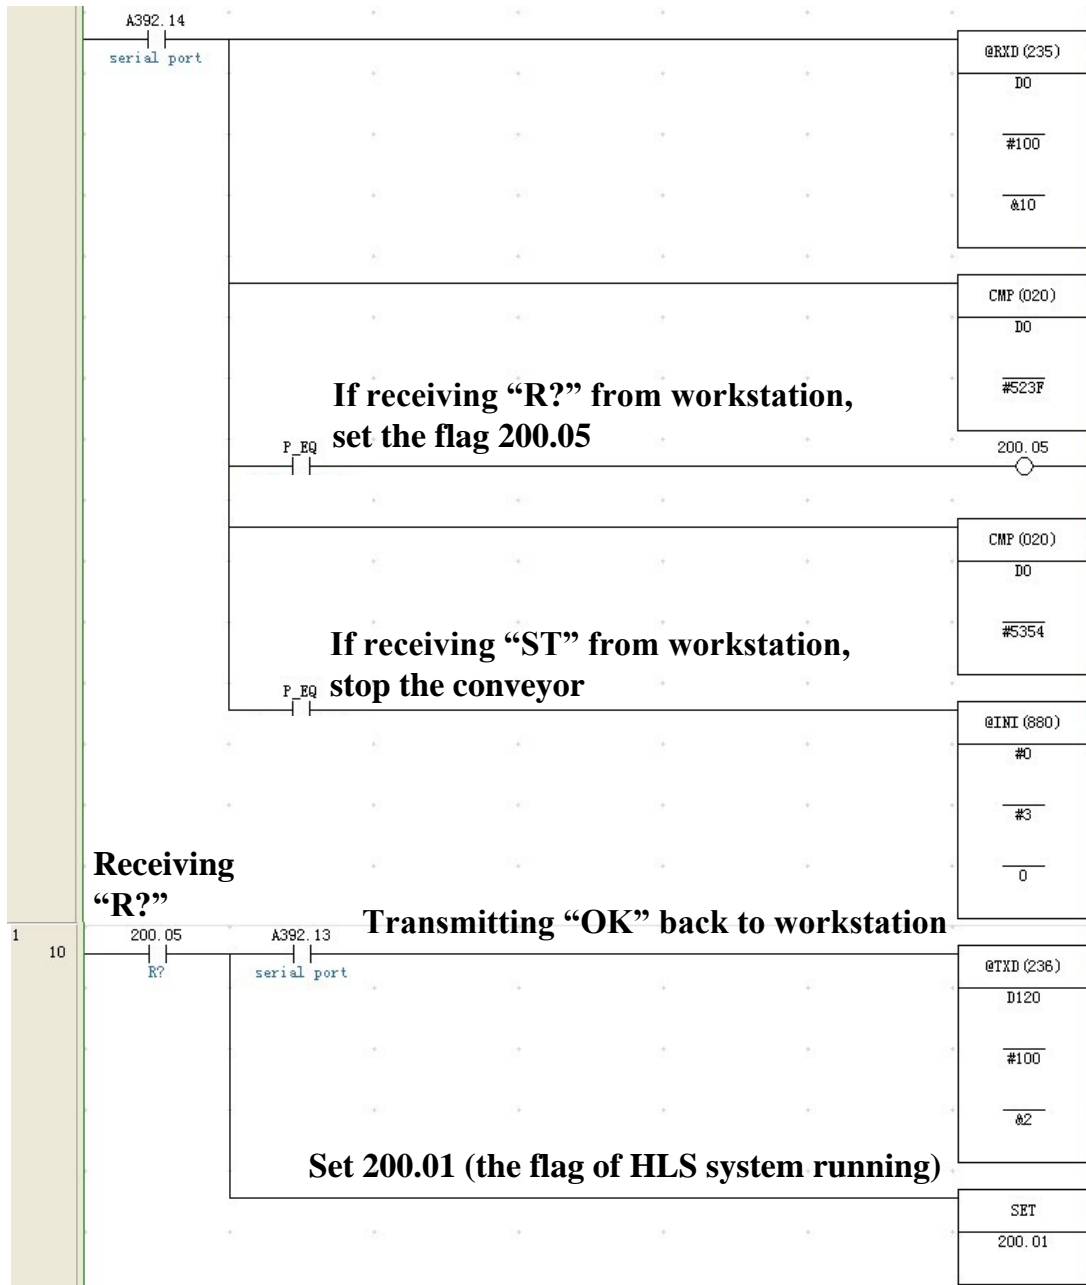

Fig. N8. The source code of the PLC (part 1).

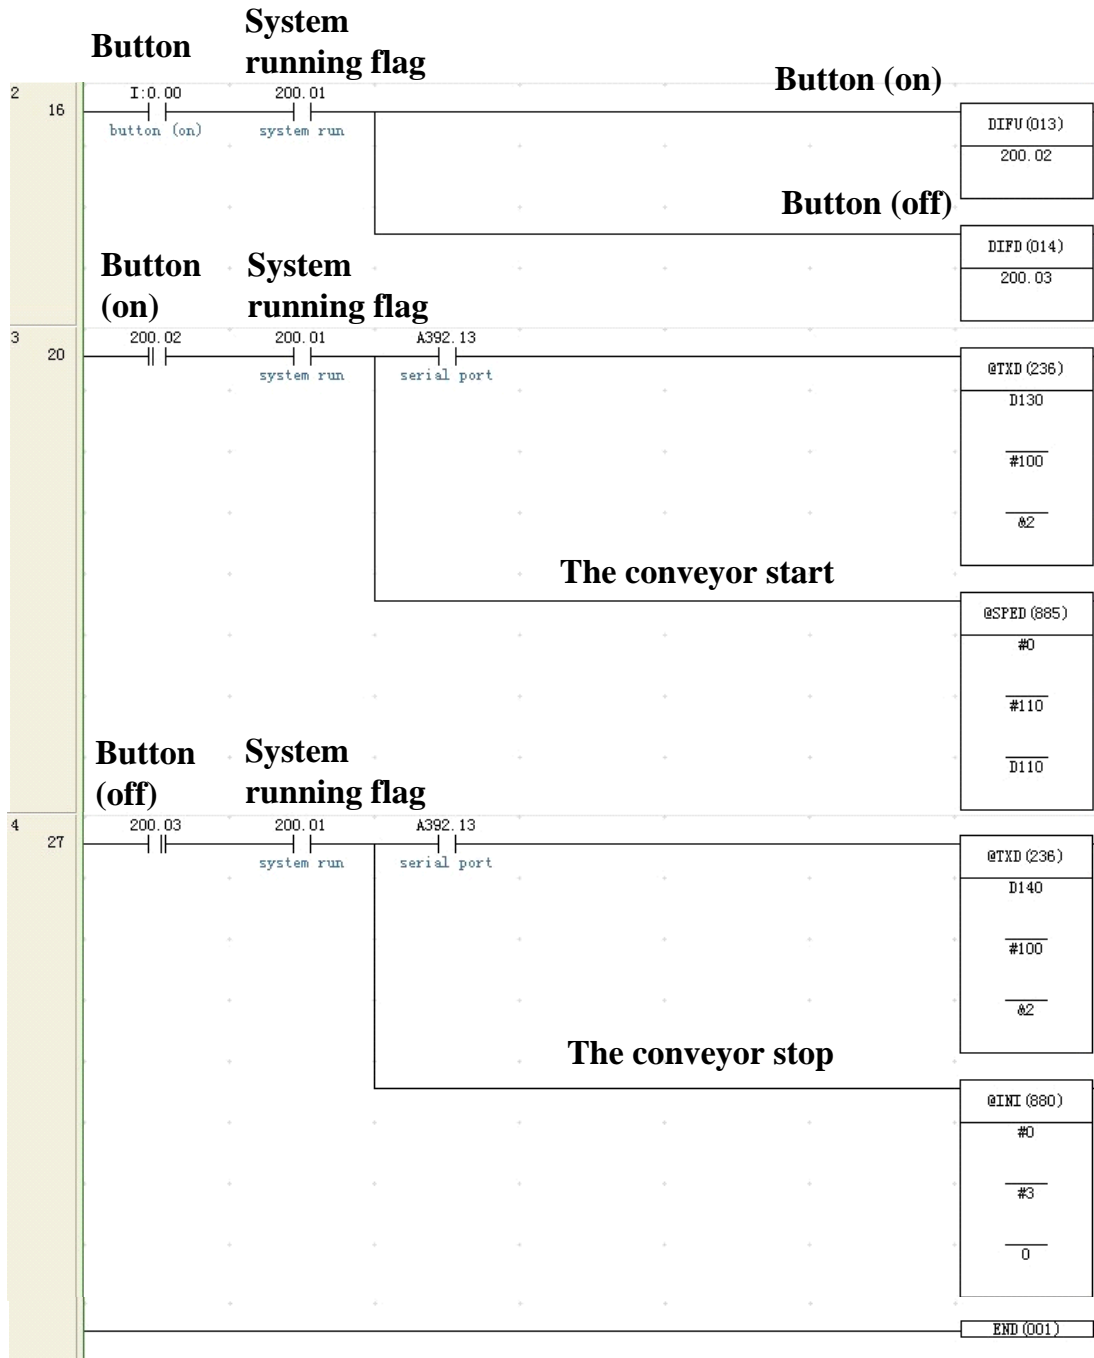

Fig. N9. The source code of the PLC (part 2).

## 6. Associated lead SNPs of loci linked to known genes

The distance of the lead SNP sf0331940902 of the locus 81 associated with *GLA*<sub>2</sub> at late tillering stage and a known leaf development-related gene *OSH43* is approximately 17 kb. The lead SNP sf0516433687 of locus 130 associated with *GLA*<sub>2</sub> at late tillering stage is approximately 21 kb away from a rice leaf color-related gene *YGL1*. The lead SNP sf 0300610972 of locus 58 associated with *GLAR*<sub>3</sub> at late tillering stage is approximately 54 kb away from a rice Class III homeodomain leucine



zipper (Class III HD-Zip) gene *OSHB1* related to establishment of polarity in developing leaves. The lead SNP sf1018007376 of locus 238 associated with *GLA<sub>2</sub>* at late tillering stage is approximately 7 kb away from another rice Class III homeodomain leucine zipper (Class III HD-Zip) gene, *OSHB2*. The lead SNPs sf0430972316 associated with *LWSD* at late booting stage, sf0431040266 associated with *ALWR* at late booting stage, sf0431078190 associated with *APAR* at late booting stage, sf0431039801 associated with *APAR* and *MPAR* at milk grain stage of locus 109 are approximately 46, 11, 49, 10 kb away from a known gene *Nall* affecting rice leaf blade width. The lead SNP sf1225260606 and sf1225286279 of locus 285 associated with *ALL* and *ALP* at late booting stage are approximately 31 kb and 6kb away from *OsIAA3* gene controlling rice leaf length, respectively. The lead SNP sf1200141009 of locus 266 associated with *LWSD* at milk grain stage is approximately 77 kb away from *NAL3* gene encoding WUSCHEL-related homeobox 3A (*OsWOX3A*) affecting rice leaf width. The lead SNP sf1021751079 of locus 240 associated with *GLA<sub>2</sub>* at late tillering stage is approximately 60kb away from *OsNRT1*, a gene responsible for transporting nitrate.

**Supplementary Table S1 Leaf traits calculations with the HLS.**

| Classifications    | Abbreviation      | Definition                                     | Calculation                                                                                                                    |
|--------------------|-------------------|------------------------------------------------|--------------------------------------------------------------------------------------------------------------------------------|
| Leaf size related  | LN                | Leaf number per plant                          | Total leaf number per plant.                                                                                                   |
|                    | GLA               | Green leaf area per plant (mm <sup>2</sup> )   | Represent the area of total green leaves per plant.                                                                            |
|                    | TLA               | Total leaf area per plant (mm <sup>2</sup> )   | Represent the area of total leaves (including green leaves and yellow leaves) per plant.                                       |
|                    | GLAR              | Green leaf area ratio                          | $GLAR = \frac{GLA}{TLA}$ , $GLA$ is the green leaf area, and $TLA$ is the total leaf area.                                     |
|                    | ALA               | Average leaf area (mm <sup>2</sup> )           | $ALA = \frac{1}{LN} \sum_{i=1}^{LN} x_{Ai}$ , $x_{Ai}$ is the leaf area of $i$ th leaf, and $LN$ is the leaf number per plant. |
|                    | MLA               | Maximum leaf area (mm <sup>2</sup> )           | $MLA = MAX(x_{Ai})$ , $i = 1, 2, \dots, LN$ , $x_{Ai}$ is the leaf area of $i$ th leaf, and $LN$ is the leaf number per plant. |
| Leaf color related | GLA <sub>2</sub>  | Green-2 leaf area per plant (mm <sup>2</sup> ) | Represent the leaves whose color is similar to the group 2 of the leaf color chart designed by the IRRI.                       |
|                    | GLA <sub>3</sub>  | Green-3 leaf area per plant (mm <sup>2</sup> ) | Represent the leaves whose color is similar to the group 3 of the leaf color chart designed by the IRRI.                       |
|                    | GLA <sub>4</sub>  | Green-4 leaf area per plant (mm <sup>2</sup> ) | Represent the leaves whose color is similar to the group 4 of the leaf color chart designed by the IRRI.                       |
|                    | GLAR <sub>2</sub> | Green-2 leaf area ratio                        | $GLAR_2 = \frac{GLA_2}{GLA}$ , $GLA_2$ is the green-2 leaf area per plant, and $GLA$ is the green leaf area per plant.         |
|                    | GLAR <sub>3</sub> | Green-3 leaf area ratio                        | $GLAR_3 = \frac{GLA_3}{GLA}$ , $GLA_3$ is the green-3 leaf area per plant, and $GLA$ is the green leaf area per plant.         |

|                    |  |                   |                                                |                                                                                                                                                                                                                                                    |
|--------------------|--|-------------------|------------------------------------------------|----------------------------------------------------------------------------------------------------------------------------------------------------------------------------------------------------------------------------------------------------|
|                    |  | GLAR <sub>4</sub> | Green-4 leaf area ratio                        | $GLAR_4 = \frac{GLA_4}{GLA}$ , $GLA_4$ is the green-4 leaf area per plant, and $GLA$ is the green leaf area per plant.                                                                                                                             |
|                    |  | GLCC              | Green leaf color classification                | the rice leaves are classified into group $i$ , such that $GLAR_i = \max(GLAR_2, GLAR_3, GLAR_4)$ , $i = 2, 3, 4$ . $GLAR_2$ is the green-2 leaf area ratio, $GLAR_3$ is the green-3 leaf area ratio, and $GLAR_4$ is the green-4 leaf area ratio. |
| Leaf shape related |  | LLSD              | Leaf length standard deviation per plant (mm)  | $LLSD = \sqrt{\frac{1}{LN} \sum_{i=1}^{LN} (x_{li} - \mu_l)^2}$ , $x_{li}$ is the leaf length of $i$ th leaf and $\mu_l$ is the average value of the leaf length per plant.                                                                        |
|                    |  | LWSD              | Leaf width standard deviation per plant (mm)   | $LWSD = \sqrt{\frac{1}{LN} \sum_{i=1}^{LN} (x_{wi} - \mu_w)^2}$ , $x_{wi}$ is the leaf width of $i$ th leaf and $\mu_w$ is the average value of the leaf width per plant.                                                                          |
|                    |  | ALL               | Average leaf length (mm)                       | $ALL = \frac{1}{LN} \sum_{i=1}^{LN} x_{li}$ , $x_{li}$ is the leaf length of $i$ th leaf.                                                                                                                                                          |
|                    |  | ALW               | Average leaf width (mm)                        | $ALW = \frac{1}{LN} \sum_{i=1}^{LN} x_{wi}$ , $x_{wi}$ is the leaf width of $i$ th leaf.                                                                                                                                                           |
|                    |  | ALRA              | Average leaf rectangle area (mm <sup>2</sup> ) | $ALRA = \frac{1}{LN} \sum_{i=1}^{LN} x_{li} \times x_{wi}$ , $x_{li}$ is the leaf length of $i$ th leaf, $x_{wi}$ is the leaf width of $i$ th leaf.                                                                                                |
|                    |  | ALWR              | Average leaf length/leaf width ratio           | $ALWR = \frac{1}{LN} \sum_{i=1}^{LN} \frac{x_{li}}{x_{wi}}$ , $x_{li}$ is the leaf length of $i$ th leaf, $x_{wi}$ is the leaf width of $i$ th leaf.                                                                                               |
|                    |  | ALP               | Average leaf perimeter (mm)                    | $ALP = \frac{1}{LN} \sum_{i=1}^{LN} x_{pi}$ , $x_{pi}$ is the leaf perimeter of $i$ th leaf.                                                                                                                                                       |
|                    |  | APAR              | Average leaf perimeter/leaf area ratio (1/mm)  | $APAR = \frac{1}{LN} \sum_{i=1}^{LN} \frac{x_{pi}}{x_{Ai}}$ , $x_{pi}$ is the leaf perimeter of $i$ th leaf, $x_{Ai}$ is the leaf area of $i$ th leaf.                                                                                             |
|                    |  | ALC               | Average leaf compactness                       | $ALC = \frac{1}{LN} \sum_{i=1}^{LN} \frac{x_{Ai}}{x_{li} \times x_{wi}}$ , $x_{Ai}$ is the leaf area of $i$ th leaf, $x_{li}$ is the leaf length of $i$ th leaf, $x_{wi}$ is the leaf width of $i$ th leaf.                                        |
|                    |  | MLL               | Maximum leaf length (mm)                       | $MLL = \text{MAX}(x_{li})$ , $i = 1, 2, \dots, LN$ , $x_{li}$ is the leaf length of $i$ th leaf.                                                                                                                                                   |

|      |                                               |                                                                                                                                                                                                                |
|------|-----------------------------------------------|----------------------------------------------------------------------------------------------------------------------------------------------------------------------------------------------------------------|
| MLW  | Maximum leaf width (mm)                       | $MLW = MAX(x_{wi}), \quad i = 1, 2, \dots, LN$<br>, $x_{wi}$ is the leaf width of $ith$ leaf.                                                                                                                  |
| MLRA | Maximum leaf rectangle area(mm <sup>2</sup> ) | $MLRA = MAX(x_{li} \times x_{wi}), \quad i = 1, 2, \dots, LN$<br>, $x_{li}$ is the leaf length of $ith$ leaf, $x_{wi}$ is the leaf width of $ith$ leaf.                                                        |
| MLWR | Maximum leaf length/leaf width ratio          | $MLWR = MAX(\frac{x_{li}}{x_{wi}}), \quad i = 1, 2, \dots, LN$<br>, $x_{li}$ is the leaf length of $ith$ leaf, $x_{wi}$ is the leaf width of $ith$ leaf.                                                       |
| MLP  | Maximum leaf perimeter (mm)                   | $MLP = MAX(x_{pi}), \quad i = 1, 2, \dots, LN$<br>, $x_{pi}$ is the leaf perimeter of $ith$ leaf.                                                                                                              |
| MPAR | Maximum leaf perimeter/leaf area ratio (1/mm) | $MPAR = MAX(\frac{x_{pi}}{x_{Ai}}), \quad i = 1, 2, \dots, LN$<br>, $x_{pi}$ is the leaf perimeter of $ith$ leaf, $x_{Ai}$ is the leaf area of $ith$ leaf.                                                     |
| MLC  | Maximum leaf compactness                      | $MLC = MAX(\frac{x_{Ai}}{x_{li} \times x_{wi}}), \quad i = 1, 2, \dots, LN$<br>, $x_{Ai}$ is the leaf area of $ith$ leaf, $x_{li}$ is the leaf length of $ith$ leaf, $x_{wi}$ is the leaf width of $ith$ leaf. |

---

**Supplementary Table S2** Effective number of SNPs across rice genome and LD-adjusted Bonferroni corrected p-value thresholds

| Chromosome | Observed_Number | Effective_Number | Effective_Ratio | Suggestive_P_Value | Significant_P_Value |
|------------|-----------------|------------------|-----------------|--------------------|---------------------|
| 1          | 498272          | 87561            | 0.18            | 1.14E-05           | 5.71E-07            |
| 2          | 387222          | 67305            | 0.17            | 1.49E-05           | 7.43E-07            |
| 3          | 381693          | 60705            | 0.16            | 1.65E-05           | 8.24E-07            |
| 4          | 372273          | 76170            | 0.20            | 1.31E-05           | 6.56E-07            |
| 5          | 309780          | 50767            | 0.16            | 1.97E-05           | 9.85E-07            |
| 6          | 364052          | 65485            | 0.18            | 1.53E-05           | 7.64E-07            |
| 7          | 343840          | 64962            | 0.19            | 1.54E-05           | 7.70E-07            |
| 8          | 345123          | 70740            | 0.20            | 1.41E-05           | 7.07E-07            |
| 9          | 278739          | 55701            | 0.20            | 1.80E-05           | 8.98E-07            |
| 10         | 316925          | 61777            | 0.19            | 1.62E-05           | 8.09E-07            |
| 11         | 398281          | 89597            | 0.22            | 1.12E-05           | 5.58E-07            |
| 12         | 362400          | 78681            | 0.22            | 1.27E-05           | 6.35E-07            |
| Genome     | 4358600         | 829451           | 0.19            | 1.21E-06           | 6.03E-08            |

Supplementary table S3 GWAS results with the suggestive *P* value threshold.

| Stage | Trait                  | Lead SNP ID  | Chr. | Position | Locus ID   | <i>P</i> value | Known genes  |
|-------|------------------------|--------------|------|----------|------------|----------------|--------------|
|       | <i>ALC</i>             | sf0619345108 | 6    | 19345108 | <b>156</b> | 1.16E-06       |              |
|       | <i>ALRA</i>            | sf1008833338 | 10   | 8833338  | <b>232</b> | 1.07E-06       |              |
|       | <i>ALW</i>             | sf0235130542 | 2    | 35130542 | <b>56</b>  | 7.09E-07       |              |
|       | <i>ALW</i>             | sf1104981947 | 11   | 4981947  | <b>245</b> | 1.26E-07       |              |
|       | <i>ALWR</i>            | sf0122803148 | 1    | 22803148 | <b>11</b>  | 7.48E-07       |              |
|       | <i>ALWR</i>            | sf0138403712 | 1    | 38403712 | <b>23</b>  | 9.57E-08       |              |
|       | <i>ALWR</i>            | sf0207080365 | 2    | 7080365  | <b>34</b>  | 1.18E-06       |              |
|       | <i>ALWR</i>            | sf0630075765 | 6    | 30075765 | <b>163</b> | 4.73E-07       |              |
|       | <i>ALWR</i>            | sf0726335488 | 7    | 26335488 | <b>186</b> | 1.17E-06       |              |
|       | <i>ALWR</i>            | sf1127368298 | 11   | 27368298 | <b>264</b> | 5.75E-07       |              |
|       | <i>APAR</i>            | sf0419609623 | 4    | 19609623 | <b>103</b> | 3.77E-07       |              |
|       | <i>APAR</i>            | sf0915958783 | 9    | 15958783 | <b>219</b> | 1.76E-07       |              |
|       | <i>APAR</i>            | sf1104981947 | 11   | 4981947  | <b>245</b> | 6.73E-08       |              |
|       | <i>GLA</i>             | sf0102578034 | 1    | 2578034  | <b>1</b>   | 6.08E-08       |              |
|       | <i>GLA</i>             | sf0207450950 | 2    | 7450950  | <b>35</b>  | 4.61E-07       |              |
|       | <i>GLA<sub>2</sub></i> | sf0108312563 | 1    | 8312563  | <b>2</b>   | 5.45E-07       |              |
|       | <i>GLA<sub>2</sub></i> | sf0114076144 | 1    | 14076144 | <b>4</b>   | 1.13E-07       |              |
|       | <i>GLA<sub>2</sub></i> | sf0114653019 | 1    | 14653019 | <b>5</b>   | 9.61E-09       |              |
|       | <i>GLA<sub>2</sub></i> | sf0115987001 | 1    | 15987001 | <b>6</b>   | 1.26E-07       |              |
|       | <i>GLA<sub>2</sub></i> | sf0127794903 | 1    | 27794903 | <b>12</b>  | 8.19E-07       |              |
|       | <i>GLA<sub>2</sub></i> | sf0137212688 | 1    | 37212688 | <b>20</b>  | 1.06E-08       |              |
|       | <i>GLA<sub>2</sub></i> | sf0138573557 | 1    | 38573557 | <b>23</b>  | 2.90E-07       |              |
|       | <i>GLA<sub>2</sub></i> | sf0138779837 | 1    | 38779837 | <b>24</b>  | 8.91E-08       |              |
|       | <i>GLA<sub>2</sub></i> | sf0204315109 | 2    | 4315109  | <b>32</b>  | 1.81E-07       |              |
|       | <i>GLA<sub>2</sub></i> | sf0207082062 | 2    | 7082062  | <b>34</b>  | 5.11E-07       |              |
|       | <i>GLA<sub>2</sub></i> | sf0207484769 | 2    | 7484769  | <b>35</b>  | 8.12E-09       |              |
|       | <i>GLA<sub>2</sub></i> | sf0211452728 | 2    | 11452728 | <b>39</b>  | 7.34E-07       |              |
|       | <i>GLA<sub>2</sub></i> | sf0305695371 | 3    | 5695371  | <b>62</b>  | 4.50E-08       |              |
|       | <i>GLA<sub>2</sub></i> | sf0306531323 | 3    | 6531323  | <b>64</b>  | 9.56E-07       |              |
|       | <i>GLA<sub>2</sub></i> | sf0313954229 | 3    | 13954229 | <b>69</b>  | 5.55E-08       |              |
|       | <i>GLA<sub>2</sub></i> | sf0324314764 | 3    | 24314764 | <b>75</b>  | 7.69E-07       |              |
|       | <i>GLA<sub>2</sub></i> | sf0331940902 | 3    | 31940902 | <b>81</b>  | 7.56E-09       | <i>OSH43</i> |
|       | <i>GLA<sub>2</sub></i> | sf0406027943 | 4    | 6027943  | <b>93</b>  | 2.94E-10       |              |
|       | <i>GLA<sub>2</sub></i> | sf0409991261 | 4    | 9991261  | <b>96</b>  | 2.38E-07       |              |
|       | <i>GLA<sub>2</sub></i> | sf0412471343 | 4    | 12471343 | <b>98</b>  | 3.35E-07       |              |
|       | <i>GLA<sub>2</sub></i> | sf0434222733 | 4    | 34222733 | <b>115</b> | 7.05E-07       |              |
|       | <i>GLA<sub>2</sub></i> | sf0502421097 | 5    | 2421097  | <b>117</b> | 2.89E-09       |              |
|       | <i>GLA<sub>2</sub></i> | sf0513728565 | 5    | 13728565 | <b>126</b> | 5.48E-12       |              |
|       | <i>GLA<sub>2</sub></i> | sf0514135932 | 5    | 14135932 | <b>127</b> | 7.82E-08       |              |
|       | <i>GLA<sub>2</sub></i> | sf0514281006 | 5    | 14281006 | <b>127</b> | 1.93E-07       |              |
|       | <i>GLA<sub>2</sub></i> | sf0514489026 | 5    | 14489026 | <b>128</b> | 3.18E-07       |              |
|       | <i>GLA<sub>2</sub></i> | sf0514804131 | 5    | 14804131 | <b>129</b> | 6.07E-07       |              |
|       | <i>GLA<sub>2</sub></i> | sf0516433687 | 5    | 16433687 | <b>130</b> | 1.76E-09       | <i>YGL1</i>  |
|       | <i>GLA<sub>2</sub></i> | sf0518905497 | 5    | 18905497 | <b>131</b> | 9.70E-07       |              |
|       | <i>GLA<sub>2</sub></i> | sf0525748215 | 5    | 25748215 | <b>136</b> | 8.10E-09       |              |
|       | <i>GLA<sub>2</sub></i> | sf0618243370 | 6    | 18243370 | <b>155</b> | 1.11E-07       |              |
|       | <i>GLA<sub>2</sub></i> | sf0630583038 | 6    | 30583038 | <b>164</b> | 4.66E-08       |              |
|       | <i>GLA<sub>2</sub></i> | sf0700219702 | 7    | 219702   | <b>166</b> | 4.36E-09       |              |
|       | <i>GLA<sub>2</sub></i> | sf0711200104 | 7    | 11200104 | <b>174</b> | 1.43E-09       |              |
|       | <i>GLA<sub>2</sub></i> | sf0804368745 | 8    | 4368745  | <b>190</b> | 3.05E-09       |              |
|       | <i>GLA<sub>2</sub></i> | sf0822950418 | 8    | 22950418 | <b>202</b> | 6.53E-08       |              |
|       | <i>GLA<sub>2</sub></i> | sf0826476003 | 8    | 26476003 | <b>206</b> | 1.47E-10       |              |
|       | <i>GLA<sub>2</sub></i> | sf0905443985 | 9    | 5443985  | <b>210</b> | 1.44E-08       |              |
|       | <i>GLA<sub>2</sub></i> | sf0908834656 | 9    | 8834656  | <b>214</b> | 8.61E-07       |              |
|       | <i>GLA<sub>2</sub></i> | sf0914005048 | 9    | 14005048 | <b>217</b> | 7.55E-07       |              |
|       | <i>GLA<sub>2</sub></i> | sf1000985386 | 10   | 985386   | <b>227</b> | 1.40E-07       |              |
|       | <i>GLA<sub>2</sub></i> | sf1002442905 | 10   | 2442905  | <b>229</b> | 8.39E-07       |              |

|  |                          |              |    |          |            |          |               |
|--|--------------------------|--------------|----|----------|------------|----------|---------------|
|  | <i>GLA</i> <sub>2</sub>  | sf1017768320 | 10 | 17768320 | <b>237</b> | 1.94E-07 |               |
|  | <i>GLA</i> <sub>2</sub>  | sf1018007376 | 10 | 18007376 | <b>238</b> | 8.90E-07 | <b>OSHB2</b>  |
|  | <i>GLA</i> <sub>2</sub>  | sf1021751079 | 10 | 21751079 | <b>240</b> | 1.40E-07 | <b>OsNRTI</b> |
|  | <i>GLA</i> <sub>2</sub>  | sf1022775806 | 10 | 22775806 | <b>241</b> | 2.23E-09 |               |
|  | <i>GLA</i> <sub>2</sub>  | sf1104320861 | 11 | 4320861  | <b>244</b> | 5.03E-07 |               |
|  | <i>GLA</i> <sub>2</sub>  | sf1113756716 | 11 | 13756716 | <b>253</b> | 4.72E-07 |               |
|  | <i>GLA</i> <sub>2</sub>  | sf1126753044 | 11 | 26753044 | <b>262</b> | 1.73E-08 |               |
|  | <i>GLA</i> <sub>2</sub>  | sf1202270243 | 12 | 2270243  | <b>269</b> | 7.19E-09 |               |
|  | <i>GLA</i> <sub>2</sub>  | sf1215302938 | 12 | 15302938 | <b>278</b> | 1.57E-07 |               |
|  | <i>GLA</i> <sub>2</sub>  | sf1215471534 | 12 | 15471534 | <b>278</b> | 1.17E-06 |               |
|  | <i>GLA</i> <sub>2</sub>  | sf1215668235 | 12 | 15668235 | <b>279</b> | 1.21E-08 |               |
|  | <i>GLA</i> <sub>2</sub>  | sf1224620960 | 12 | 24620960 | <b>284</b> | 4.50E-09 |               |
|  | <i>GLA</i> <sub>2</sub>  | sf1022040541 | 10 | 22040541 | <b>289</b> | 7.88E-07 | <b>OshoxI</b> |
|  | <i>GLA</i> <sub>3</sub>  | sf0207447476 | 2  | 7447476  | <b>35</b>  | 9.31E-07 |               |
|  | <i>GLA</i> <sub>3</sub>  | sf0300228477 | 3  | 228477   | <b>57</b>  | 5.60E-07 |               |
|  | <i>GLA</i> <sub>3</sub>  | sf0514281006 | 5  | 14281006 | <b>127</b> | 5.20E-08 |               |
|  | <i>GLA</i> <sub>3</sub>  | sf0603027903 | 6  | 3027903  | <b>142</b> | 5.93E-07 |               |
|  | <i>GLA</i> <sub>3</sub>  | sf0626148781 | 6  | 26148781 | <b>162</b> | 6.25E-07 |               |
|  | <i>GLAR</i>              | sf0129629431 | 1  | 29629431 | <b>14</b>  | 2.14E-10 |               |
|  | <i>GLAR</i>              | sf0130806251 | 1  | 30806251 | <b>16</b>  | 7.01E-08 |               |
|  | <i>GLAR</i>              | sf0133369195 | 1  | 33369195 | <b>19</b>  | 3.60E-07 |               |
|  | <i>GLAR</i>              | sf0139225674 | 1  | 39225674 | <b>25</b>  | 6.17E-07 |               |
|  | <i>GLAR</i>              | sf0233343719 | 2  | 33343719 | <b>54</b>  | 4.85E-07 |               |
|  | <i>GLAR</i>              | sf0317027007 | 3  | 17027007 | <b>70</b>  | 3.11E-07 |               |
|  | <i>GLAR</i>              | sf0321299161 | 3  | 21299161 | <b>73</b>  | 3.48E-07 |               |
|  | <i>GLAR</i>              | sf0323995809 | 3  | 23995809 | <b>74</b>  | 1.31E-09 |               |
|  | <i>GLAR</i>              | sf0432141352 | 4  | 32141352 | <b>112</b> | 8.42E-08 |               |
|  | <i>GLAR</i>              | sf0616715458 | 6  | 16715458 | <b>154</b> | 4.60E-08 |               |
|  | <i>GLAR</i>              | sf0718737228 | 7  | 18737228 | <b>178</b> | 1.91E-07 |               |
|  | <i>GLAR</i>              | sf0915023106 | 9  | 15023106 | <b>218</b> | 9.17E-07 |               |
|  | <i>GLAR</i>              | sf1106112328 | 11 | 6112328  | <b>246</b> | 2.48E-08 |               |
|  | <i>GLAR</i>              | sf1209698383 | 12 | 9698383  | <b>275</b> | 2.15E-07 |               |
|  | <i>GLAR</i> <sub>2</sub> | sf0131154419 | 1  | 31154419 | <b>17</b>  | 1.05E-07 |               |
|  | <i>GLAR</i> <sub>2</sub> | sf1210907185 | 12 | 10907185 | <b>276</b> | 1.01E-06 |               |
|  | <i>GLAR</i> <sub>3</sub> | sf0210670093 | 2  | 10670093 | <b>38</b>  | 1.34E-07 |               |
|  | <i>GLAR</i> <sub>3</sub> | sf0219792797 | 2  | 19792797 | <b>45</b>  | 7.23E-07 |               |
|  | <i>GLAR</i> <sub>3</sub> | sf0300610972 | 3  | 610972   | <b>58</b>  | 1.18E-06 | <b>OSHB1</b>  |
|  | <i>GLAR</i> <sub>3</sub> | sf0308357750 | 3  | 8357750  | <b>67</b>  | 3.70E-07 |               |
|  | <i>GLAR</i> <sub>3</sub> | sf0325211812 | 3  | 25211812 | <b>76</b>  | 5.97E-07 |               |
|  | <i>GLAR</i> <sub>3</sub> | sf0400994591 | 4  | 994591   | <b>85</b>  | 1.02E-07 |               |
|  | <i>GLAR</i> <sub>3</sub> | sf0401713624 | 4  | 1713624  | <b>86</b>  | 1.89E-07 |               |
|  | <i>GLAR</i> <sub>3</sub> | sf0402215064 | 4  | 2215064  | <b>87</b>  | 6.30E-07 |               |
|  | <i>GLAR</i> <sub>3</sub> | sf0529205395 | 5  | 29205395 | <b>140</b> | 2.65E-08 |               |
|  | <i>GLAR</i> <sub>3</sub> | sf0612438676 | 6  | 12438676 | <b>150</b> | 2.38E-07 |               |
|  | <i>GLAR</i> <sub>3</sub> | sf0630973534 | 6  | 30973534 | <b>165</b> | 5.76E-07 |               |
|  | <i>GLAR</i> <sub>3</sub> | sf0708241028 | 7  | 8241028  | <b>173</b> | 1.62E-08 |               |
|  | <i>GLAR</i> <sub>3</sub> | sf0715989750 | 7  | 15989750 | <b>176</b> | 1.10E-06 |               |
|  | <i>GLAR</i> <sub>3</sub> | sf0719639267 | 7  | 19639267 | <b>180</b> | 1.94E-13 |               |
|  | <i>GLAR</i> <sub>3</sub> | sf0719728350 | 7  | 19728350 | <b>180</b> | 3.62E-08 |               |
|  | <i>GLAR</i> <sub>3</sub> | sf0719817763 | 7  | 19817763 | <b>180</b> | 6.19E-11 |               |
|  | <i>GLAR</i> <sub>3</sub> | sf0719861668 | 7  | 19861668 | <b>181</b> | 7.43E-08 |               |
|  | <i>GLAR</i> <sub>3</sub> | sf0719933345 | 7  | 19933345 | <b>181</b> | 5.54E-08 |               |
|  | <i>GLAR</i> <sub>3</sub> | sf0810028277 | 8  | 10028277 | <b>193</b> | 2.26E-07 |               |
|  | <i>GLAR</i> <sub>3</sub> | sf1011748677 | 10 | 11748677 | <b>234</b> | 1.41E-07 |               |
|  | <i>GLAR</i> <sub>3</sub> | sf1015597665 | 10 | 15597665 | <b>236</b> | 7.94E-07 |               |
|  | <i>GLAR</i> <sub>3</sub> | sf1117150282 | 11 | 17150282 | <b>254</b> | 2.07E-10 |               |
|  | <i>GLAR</i> <sub>4</sub> | sf0630973534 | 6  | 30973534 | <b>165</b> | 6.39E-07 |               |
|  | <i>GLAR</i> <sub>4</sub> | sf0719732764 | 7  | 19732764 | <b>180</b> | 1.02E-08 |               |
|  | <i>GLAR</i> <sub>4</sub> | sf0719859898 | 7  | 19859898 | <b>181</b> | 8.10E-11 |               |
|  | <i>GLAR</i> <sub>4</sub> | sf0724505838 | 7  | 24505838 | <b>184</b> | 1.86E-07 |               |
|  | <i>GLAR</i> <sub>4</sub> | sf1117150282 | 11 | 17150282 | <b>254</b> | 1.85E-07 |               |

|             |              |    |          |            |          |
|-------------|--------------|----|----------|------------|----------|
| <i>GLCC</i> | sf0719639464 | 7  | 19639464 | <b>180</b> | 4.43E-09 |
| <i>LLSD</i> | sf0208795000 | 2  | 8795000  | <b>37</b>  | 8.71E-07 |
| <i>LLSD</i> | sf0501147707 | 5  | 1147707  | <b>116</b> | 1.69E-07 |
| <i>LLSD</i> | sf0622226761 | 6  | 22226761 | <b>159</b> | 1.76E-07 |
| <i>LLSD</i> | sf0825379754 | 8  | 25379754 | <b>204</b> | 1.59E-07 |
| <i>LLSD</i> | sf1011328985 | 10 | 11328985 | <b>233</b> | 3.25E-08 |
| <i>LN</i>   | sf0700720606 | 7  | 720606   | <b>167</b> | 8.01E-07 |
| <i>LWSD</i> | sf0203791234 | 2  | 3791234  | <b>31</b>  | 6.91E-09 |
| <i>LWSD</i> | sf0207348150 | 2  | 7348150  | <b>35</b>  | 3.40E-07 |
| <i>LWSD</i> | sf0213745376 | 2  | 13745376 | <b>41</b>  | 1.10E-06 |
| <i>LWSD</i> | sf0311817405 | 3  | 11817405 | <b>68</b>  | 1.21E-06 |
| <i>LWSD</i> | sf0318258416 | 3  | 18258416 | <b>71</b>  | 7.50E-07 |
| <i>LWSD</i> | sf0321302599 | 3  | 21302599 | <b>73</b>  | 7.33E-07 |
| <i>LWSD</i> | sf0332469691 | 3  | 32469691 | <b>82</b>  | 1.30E-07 |
| <i>LWSD</i> | sf0335091878 | 3  | 35091878 | <b>83</b>  | 2.37E-07 |
| <i>LWSD</i> | sf0416720716 | 4  | 16720716 | <b>101</b> | 5.98E-07 |
| <i>LWSD</i> | sf0514011442 | 5  | 14011442 | <b>127</b> | 1.27E-08 |
| <i>LWSD</i> | sf0528903428 | 5  | 28903428 | <b>139</b> | 4.99E-09 |
| <i>LWSD</i> | sf0603166566 | 6  | 3166566  | <b>142</b> | 7.59E-07 |
| <i>LWSD</i> | sf0606820810 | 6  | 6820810  | <b>144</b> | 8.94E-10 |
| <i>LWSD</i> | sf0623068763 | 6  | 23068763 | <b>160</b> | 6.48E-08 |
| <i>LWSD</i> | sf0719536933 | 7  | 19536933 | <b>180</b> | 3.20E-07 |
| <i>LWSD</i> | sf0819105776 | 8  | 19105776 | <b>199</b> | 2.44E-07 |
| <i>LWSD</i> | sf0827450584 | 8  | 27450584 | <b>207</b> | 8.84E-07 |
| <i>LWSD</i> | sf1011992245 | 10 | 11992245 | <b>234</b> | 6.23E-07 |
| <i>LWSD</i> | sf1126452660 | 11 | 26452660 | <b>262</b> | 5.56E-07 |
| <i>LWSD</i> | sf1127580568 | 11 | 27580568 | <b>264</b> | 4.61E-09 |
| <i>LWSD</i> | sf1219252080 | 12 | 19252080 | <b>282</b> | 4.96E-07 |
| <i>MLC</i>  | sf1107968499 | 11 | 7968499  | <b>250</b> | 8.31E-08 |
| <i>MLL</i>  | sf0141126624 | 1  | 41126624 | <b>28</b>  | 2.75E-07 |
| <i>MLL</i>  | sf0905048259 | 9  | 5048259  | <b>209</b> | 1.39E-07 |
| <i>MLL</i>  | sf0916436027 | 9  | 16436027 | <b>220</b> | 1.08E-06 |
| <i>MLL</i>  | sf1011136498 | 10 | 11136498 | <b>233</b> | 7.17E-07 |
| <i>MLP</i>  | sf0140053170 | 1  | 40053170 | <b>27</b>  | 2.96E-07 |
| <i>MLP</i>  | sf0522529850 | 5  | 22529850 | <b>134</b> | 5.55E-07 |
| <i>MLP</i>  | sf0905622775 | 9  | 5622775  | <b>210</b> | 7.59E-07 |
| <i>MLP</i>  | sf0916881637 | 9  | 16881637 | <b>221</b> | 5.74E-07 |
| <i>MLP</i>  | sf1126256678 | 11 | 26256678 | <b>261</b> | 3.30E-07 |
| <i>MLRA</i> | sf0311764061 | 3  | 11764061 | <b>68</b>  | 4.16E-07 |
| <i>MLRA</i> | sf1126135725 | 11 | 26135725 | <b>261</b> | 2.67E-07 |
| <i>MLW</i>  | sf0219923827 | 2  | 19923827 | <b>45</b>  | 1.06E-06 |
| <i>MLW</i>  | sf0311764061 | 3  | 11764061 | <b>68</b>  | 5.59E-07 |
| <i>MLW</i>  | sf0920969473 | 9  | 20969473 | <b>226</b> | 1.01E-07 |
| <i>MLW</i>  | sf1105896366 | 11 | 5896366  | <b>246</b> | 4.41E-08 |
| <i>MLWR</i> | sf0630075765 | 6  | 30075765 | <b>163</b> | 6.15E-07 |
| <i>MPAR</i> | sf0235130542 | 2  | 35130542 | <b>56</b>  | 2.90E-07 |
| <i>MPAR</i> | sf0719817702 | 7  | 19817702 | <b>180</b> | 6.46E-07 |
| <i>TLA</i>  | sf0102578034 | 1  | 2578034  | <b>1</b>   | 1.02E-07 |
| <i>TLA</i>  | sf0207450950 | 2  | 7450950  | <b>35</b>  | 4.56E-07 |
| <i>ALA</i>  | sf0411825119 | 4  | 11825119 | <b>97</b>  | 7.67E-07 |
| <i>ALA</i>  | sf0432485240 | 4  | 32485240 | <b>113</b> | 2.62E-07 |
| <i>ALA</i>  | sf0920565771 | 9  | 20565771 | <b>225</b> | 8.09E-07 |
| <i>ALA</i>  | sf1011291409 | 10 | 11291409 | <b>233</b> | 7.93E-08 |
| <i>ALA</i>  | sf1122466326 | 11 | 22466326 | <b>258</b> | 6.51E-07 |
| <i>ALC</i>  | sf0137140881 | 1  | 37140881 | <b>20</b>  | 2.25E-07 |
| <i>ALC</i>  | sf0719519032 | 7  | 19519032 | <b>180</b> | 3.27E-07 |
| <i>ALC</i>  | sf0719820524 | 7  | 19820524 | <b>181</b> | 8.68E-07 |
| <i>ALL</i>  | sf0118752867 | 1  | 18752867 | <b>8</b>   | 3.83E-07 |
| <i>ALL</i>  | sf0118876546 | 1  | 18876546 | <b>8</b>   | 4.18E-07 |
| <i>ALL</i>  | sf0137119263 | 1  | 37119263 | <b>20</b>  | 2.53E-07 |
| <i>ALL</i>  | sf0428806135 | 4  | 28806135 | <b>108</b> | 7.71E-07 |
| <i>ALL</i>  | sf0514620874 | 5  | 14620874 | <b>128</b> | 2.11E-07 |



|  |                         |              |    |          |            |          |               |
|--|-------------------------|--------------|----|----------|------------|----------|---------------|
|  | <i>ALL</i>              | sf0607194039 | 6  | 7194039  | <b>145</b> | 1.15E-06 |               |
|  | <i>ALL</i>              | sf1225260606 | 12 | 25260606 | <b>285</b> | 4.31E-09 | <i>OsIAA3</i> |
|  | <i>ALL</i>              | sf1225286279 | 12 | 25286279 | <b>285</b> | 5.54E-08 | <i>OsIAA3</i> |
|  | <i>ALP</i>              | sf0118752867 | 1  | 18752867 | <b>8</b>   | 5.38E-07 |               |
|  | <i>ALP</i>              | sf0118876546 | 1  | 18876546 | <b>8</b>   | 4.80E-07 |               |
|  | <i>ALP</i>              | sf0137119263 | 1  | 37119263 | <b>20</b>  | 2.82E-07 |               |
|  | <i>ALP</i>              | sf0428806135 | 4  | 28806135 | <b>108</b> | 5.91E-07 |               |
|  | <i>ALP</i>              | sf0514620874 | 5  | 14620874 | <b>128</b> | 1.97E-07 |               |
|  | <i>ALP</i>              | sf1225260606 | 12 | 25260606 | <b>285</b> | 6.09E-09 | <i>OsIAA3</i> |
|  | <i>ALP</i>              | sf1225286279 | 12 | 25286279 | <b>285</b> | 4.68E-08 | <i>OsIAA3</i> |
|  | <i>ALRA</i>             | sf0233324844 | 2  | 33324844 | <b>54</b>  | 1.13E-06 |               |
|  | <i>ALRA</i>             | sf0411825119 | 4  | 11825119 | <b>97</b>  | 3.59E-07 |               |
|  | <i>ALRA</i>             | sf0412108993 | 4  | 12108993 | <b>97</b>  | 8.24E-07 |               |
|  | <i>ALRA</i>             | sf0432485240 | 4  | 32485240 | <b>113</b> | 2.54E-07 |               |
|  | <i>ALRA</i>             | sf0619348857 | 6  | 19348857 | <b>156</b> | 9.03E-07 |               |
|  | <i>ALRA</i>             | sf0920565771 | 9  | 20565771 | <b>225</b> | 9.98E-07 |               |
|  | <i>ALRA</i>             | sf1011291409 | 10 | 11291409 | <b>233</b> | 8.65E-08 |               |
|  | <i>ALRA</i>             | sf1122466326 | 11 | 22466326 | <b>258</b> | 1.06E-06 |               |
|  | <i>ALW</i>              | sf0920565771 | 9  | 20565771 | <b>225</b> | 1.77E-07 |               |
|  | <i>ALWR</i>             | sf0139077542 | 1  | 39077542 | <b>25</b>  | 7.29E-07 |               |
|  | <i>ALWR</i>             | sf0204078069 | 2  | 4078069  | <b>31</b>  | 8.53E-08 |               |
|  | <i>ALWR</i>             | sf0231513174 | 2  | 31513174 | <b>51</b>  | 8.99E-07 |               |
|  | <i>ALWR</i>             | sf0402755134 | 4  | 2755134  | <b>89</b>  | 7.67E-08 |               |
|  | <i>ALWR</i>             | sf0402803386 | 4  | 2803386  | <b>89</b>  | 4.71E-09 |               |
|  | <i>ALWR</i>             | sf0431040266 | 4  | 31040266 | <b>109</b> | 6.59E-08 | <i>Nall</i>   |
|  | <i>ALWR</i>             | sf0727101845 | 7  | 27101845 | <b>187</b> | 2.72E-08 |               |
|  | <i>ALWR</i>             | sf1200688120 | 12 | 688120   | <b>267</b> | 8.69E-07 |               |
|  | <i>APAR</i>             | sf0431078190 | 4  | 31078190 | <b>109</b> | 3.03E-07 | <i>Nall</i>   |
|  | <i>APAR</i>             | sf0719034927 | 7  | 19034927 | <b>179</b> | 9.91E-07 |               |
|  | <i>GLA</i>              | sf0431688161 | 4  | 31688161 | <b>111</b> | 1.52E-08 |               |
|  | <i>GLA</i>              | sf1122295601 | 11 | 22295601 | <b>258</b> | 9.59E-07 |               |
|  | <i>GLA<sub>2</sub></i>  | sf0620927842 | 6  | 20927842 | <b>158</b> | 1.52E-08 |               |
|  | <i>GLA<sub>2</sub></i>  | sf1219472764 | 12 | 19472764 | <b>282</b> | 1.10E-06 |               |
|  | <i>GLA<sub>3</sub></i>  | sf0420901284 | 4  | 20901284 | <b>105</b> | 2.25E-07 |               |
|  | <i>GLA<sub>3</sub></i>  | sf0431689032 | 4  | 31689032 | <b>111</b> | 1.56E-07 |               |
|  | <i>GLA<sub>3</sub></i>  | sf0714716256 | 7  | 14716256 | <b>175</b> | 9.00E-07 |               |
|  | <i>GLA<sub>3</sub></i>  | sf0808543315 | 8  | 8543315  | <b>192</b> | 4.78E-07 |               |
|  | <i>GLA<sub>3</sub></i>  | sf0908162862 | 9  | 8162862  | <b>212</b> | 4.23E-07 |               |
|  | <i>GLA<sub>3</sub></i>  | sf1119689449 | 11 | 19689449 | <b>256</b> | 1.19E-06 |               |
|  | <i>GLA<sub>4</sub></i>  | sf0431688161 | 4  | 31688161 | <b>111</b> | 8.87E-08 |               |
|  | <i>GLA<sub>4</sub></i>  | sf0908170004 | 9  | 8170004  | <b>212</b> | 1.83E-07 |               |
|  | <i>GLA<sub>4</sub></i>  | sf1012749918 | 10 | 12749918 | <b>235</b> | 2.82E-07 |               |
|  | <i>GLAR</i>             | sf0216062250 | 2  | 16062250 | <b>43</b>  | 3.46E-08 |               |
|  | <i>GLAR</i>             | sf0618257099 | 6  | 18257099 | <b>155</b> | 7.44E-07 |               |
|  | <i>GLAR<sub>2</sub></i> | sf0420901284 | 4  | 20901284 | <b>105</b> | 9.57E-07 |               |
|  | <i>GLAR<sub>2</sub></i> | sf0519997210 | 5  | 19997210 | <b>132</b> | 5.96E-07 |               |
|  | <i>GLAR<sub>4</sub></i> | sf0137324152 | 1  | 37324152 | <b>20</b>  | 7.47E-07 |               |
|  | <i>GLAR<sub>4</sub></i> | sf0226671495 | 2  | 26671495 | <b>49</b>  | 2.64E-07 |               |
|  | <i>GLAR<sub>4</sub></i> | sf0301308003 | 3  | 1308003  | <b>59</b>  | 2.48E-07 |               |
|  | <i>GLAR<sub>4</sub></i> | sf0620856382 | 6  | 20856382 | <b>158</b> | 6.95E-09 |               |
|  | <i>GLAR<sub>4</sub></i> | sf0620860929 | 6  | 20860929 | <b>158</b> | 1.07E-06 |               |
|  | <i>GLAR<sub>4</sub></i> | sf1221018570 | 12 | 21018570 | <b>283</b> | 8.83E-07 |               |
|  | <i>LLSD</i>             | sf0428785545 | 4  | 28785545 | <b>108</b> | 6.62E-07 |               |
|  | <i>LLSD</i>             | sf1126973639 | 11 | 26973639 | <b>263</b> | 4.05E-07 |               |
|  | <i>LN</i>               | sf0431688161 | 4  | 31688161 | <b>111</b> | 6.07E-09 |               |
|  | <i>LWSD</i>             | sf0223187963 | 2  | 23187963 | <b>46</b>  | 3.13E-07 |               |
|  | <i>LWSD</i>             | sf0304524956 | 3  | 4524956  | <b>61</b>  | 8.00E-07 |               |
|  | <i>LWSD</i>             | sf0405537421 | 4  | 5537421  | <b>92</b>  | 2.09E-07 |               |
|  | <i>LWSD</i>             | sf0430972316 | 4  | 30972316 | <b>109</b> | 1.50E-07 | <i>Nall</i>   |
|  | <i>LWSD</i>             | sf0710904892 | 7  | 10904892 | <b>174</b> | 7.05E-07 |               |
|  | <i>LWSD</i>             | sf0908837854 | 9  | 8837854  | <b>214</b> | 3.05E-07 |               |
|  | <i>LWSD</i>             | sf1004092248 | 10 | 4092248  | <b>231</b> | 1.08E-07 |               |
|  | <i>MLA</i>              | sf0428761252 | 4  | 28761252 | <b>108</b> | 4.44E-07 |               |

Late  
booting  
stage

|             |              |    |          |            |          |
|-------------|--------------|----|----------|------------|----------|
| <i>MLA</i>  | sf0432486190 | 4  | 32486190 | <b>113</b> | 8.59E-07 |
| <i>MLA</i>  | sf1201620959 | 12 | 1620959  | <b>268</b> | 6.46E-08 |
| <i>MLC</i>  | sf0611654447 | 6  | 11654447 | <b>149</b> | 1.89E-07 |
| <i>MLC</i>  | sf0619842359 | 6  | 19842359 | <b>157</b> | 4.47E-07 |
| <i>MLC</i>  | sf1123693654 | 11 | 23693654 | <b>259</b> | 8.41E-07 |
| <i>MLL</i>  | sf0428761252 | 4  | 28761252 | <b>108</b> | 3.79E-07 |
| <i>MLL</i>  | sf0428785545 | 4  | 28785545 | <b>108</b> | 2.42E-07 |
| <i>MLL</i>  | sf0507207568 | 5  | 7207568  | <b>120</b> | 1.09E-06 |
| <i>MLP</i>  | sf0725046926 | 7  | 25046926 | <b>185</b> | 8.81E-07 |
| <i>MLP</i>  | sf0817786871 | 8  | 17786871 | <b>198</b> | 1.74E-07 |
| <i>MLRA</i> | sf0428761252 | 4  | 28761252 | <b>108</b> | 8.01E-07 |
| <i>MLRA</i> | sf0432485428 | 4  | 32485428 | <b>113</b> | 1.06E-06 |
| <i>MLW</i>  | sf0234524591 | 2  | 34524591 | <b>55</b>  | 7.02E-08 |
| <i>MLW</i>  | sf0705098417 | 7  | 5098417  | <b>171</b> | 9.06E-07 |
| <i>MLWR</i> | sf0133036641 | 1  | 33036641 | <b>18</b>  | 2.26E-07 |
| <i>MLWR</i> | sf0219182078 | 2  | 19182078 | <b>44</b>  | 6.15E-07 |
| <i>MLWR</i> | sf0231852071 | 2  | 31852071 | <b>52</b>  | 8.16E-07 |
| <i>MLWR</i> | sf0504419821 | 5  | 4419821  | <b>119</b> | 9.28E-07 |
| <i>MLWR</i> | sf0908384958 | 9  | 8384958  | <b>212</b> | 1.09E-06 |
| <i>MLWR</i> | sf1126653142 | 11 | 26653142 | <b>262</b> | 7.14E-07 |
| <i>MLWR</i> | sf1208137510 | 12 | 8137510  | <b>274</b> | 1.09E-06 |
| <i>MPAR</i> | sf0233399868 | 2  | 33399868 | <b>54</b>  | 1.11E-06 |
| <i>MPAR</i> | sf0408184910 | 4  | 8184910  | <b>95</b>  | 1.04E-06 |
| <i>MPAR</i> | sf0619381533 | 6  | 19381533 | <b>156</b> | 1.59E-08 |
| <i>MPAR</i> | sf0819065928 | 8  | 19065928 | <b>199</b> | 4.56E-07 |
| <i>TLA</i>  | sf0431688161 | 4  | 31688161 | <b>111</b> | 1.27E-08 |
| <i>TLA</i>  | sf0908170004 | 9  | 8170004  | <b>212</b> | 1.09E-06 |
| <i>TLA</i>  | sf1122295601 | 11 | 22295601 | <b>258</b> | 1.04E-06 |
|             |              |    |          |            |          |
| <i>ALA</i>  | sf0128560533 | 1  | 28560533 | <b>13</b>  | 3.40E-07 |
| <i>ALA</i>  | sf0141828134 | 1  | 41828134 | <b>29</b>  | 8.87E-07 |
| <i>ALA</i>  | sf0141922044 | 1  | 41922044 | <b>29</b>  | 4.96E-07 |
| <i>ALA</i>  | sf0232313257 | 2  | 32313257 | <b>53</b>  | 1.16E-06 |
| <i>ALA</i>  | sf0327446419 | 3  | 27446419 | <b>78</b>  | 2.66E-07 |
| <i>ALA</i>  | sf0709411773 | 7  | 9411773  | <b>174</b> | 1.17E-06 |
| <i>ALA</i>  | sf0724555302 | 7  | 24555302 | <b>184</b> | 1.20E-06 |
| <i>ALA</i>  | sf0800666984 | 8  | 666984   | <b>188</b> | 1.74E-07 |
| <i>ALA</i>  | sf0814391407 | 8  | 14391407 | <b>195</b> | 4.00E-07 |
| <i>ALA</i>  | sf0821777242 | 8  | 21777242 | <b>201</b> | 8.17E-08 |
| <i>ALA</i>  | sf1116966287 | 11 | 16966287 | <b>254</b> | 7.53E-07 |
| <i>ALA</i>  | sf1123946800 | 11 | 23946800 | <b>259</b> | 1.14E-06 |
| <i>ALA</i>  | sf1125058496 | 11 | 25058496 | <b>260</b> | 2.15E-07 |
| <i>ALC</i>  | sf0141345886 | 1  | 41345886 | <b>28</b>  | 6.71E-07 |
| <i>ALL</i>  | sf0137055366 | 1  | 37055366 | <b>20</b>  | 8.42E-08 |
| <i>ALL</i>  | sf0139583671 | 1  | 39583671 | <b>26</b>  | 2.06E-07 |
| <i>ALL</i>  | sf0428557370 | 4  | 28557370 | <b>108</b> | 3.71E-07 |
| <i>ALL</i>  | sf1120033906 | 11 | 20033906 | <b>257</b> | 4.31E-07 |
| <i>ALL</i>  | sf1206312802 | 12 | 6312802  | <b>273</b> | 3.64E-07 |
| <i>ALL</i>  | sf1226297825 | 12 | 26297825 | <b>286</b> | 2.91E-07 |
| <i>ALP</i>  | sf0137055366 | 1  | 37055366 | <b>20</b>  | 1.37E-07 |
| <i>ALP</i>  | sf0139583671 | 1  | 39583671 | <b>26</b>  | 2.84E-07 |
| <i>ALP</i>  | sf0232479524 | 2  | 32479524 | <b>53</b>  | 1.11E-06 |
| <i>ALP</i>  | sf0428557370 | 4  | 28557370 | <b>108</b> | 7.12E-07 |
| <i>ALP</i>  | sf1120033906 | 11 | 20033906 | <b>257</b> | 5.50E-07 |
| <i>ALP</i>  | sf1206312802 | 12 | 6312802  | <b>273</b> | 2.72E-07 |
| <i>ALP</i>  | sf1226297825 | 12 | 26297825 | <b>286</b> | 4.62E-07 |
| <i>ALRA</i> | sf0128560533 | 1  | 28560533 | <b>13</b>  | 3.17E-07 |
| <i>ALRA</i> | sf0141828134 | 1  | 41828134 | <b>29</b>  | 5.56E-07 |
| <i>ALRA</i> | sf0141922044 | 1  | 41922044 | <b>29</b>  | 4.76E-07 |
| <i>ALRA</i> | sf0232313257 | 2  | 32313257 | <b>53</b>  | 2.93E-07 |
| <i>ALRA</i> | sf0326927102 | 3  | 26927102 | <b>77</b>  | 6.44E-07 |
| <i>ALRA</i> | sf0327446419 | 3  | 27446419 | <b>78</b>  | 1.12E-07 |
| <i>ALRA</i> | sf0431428481 | 4  | 31428481 | <b>110</b> | 9.89E-07 |

|      |              |    |          |            |          |
|------|--------------|----|----------|------------|----------|
| ALRA | sf0800666984 | 8  | 666984   | <b>188</b> | 2.32E-07 |
| ALRA | sf0814391407 | 8  | 14391407 | <b>195</b> | 4.72E-07 |
| ALRA | sf0821777242 | 8  | 21777242 | <b>201</b> | 4.74E-08 |
| ALRA | sf1116966287 | 11 | 16966287 | <b>254</b> | 8.68E-07 |
| ALRA | sf1125058496 | 11 | 25058496 | <b>260</b> | 1.19E-07 |
| ALRA | sf1200777105 | 12 | 777105   | <b>267</b> | 7.39E-07 |
| ALW  | sf0108185933 | 1  | 8185933  | <b>2</b>   | 7.45E-07 |
| ALW  | sf0114683953 | 1  | 14683953 | <b>5</b>   | 1.04E-07 |
| ALW  | sf0141826241 | 1  | 41826241 | <b>29</b>  | 2.30E-07 |
| ALW  | sf0141995597 | 1  | 41995597 | <b>29</b>  | 3.93E-07 |
| ALW  | sf0214044855 | 2  | 14044855 | <b>42</b>  | 1.04E-06 |
| ALW  | sf0413658525 | 4  | 13658525 | <b>99</b>  | 7.30E-07 |
| ALW  | sf0724264482 | 7  | 24264482 | <b>183</b> | 1.07E-06 |
| ALW  | sf0821739186 | 8  | 21739186 | <b>201</b> | 5.17E-08 |
| ALW  | sf0824083286 | 8  | 24083286 | <b>203</b> | 7.74E-07 |
| ALW  | sf1227298521 | 12 | 27298521 | <b>287</b> | 7.52E-08 |
| ALWR | sf0114214825 | 1  | 14214825 | <b>4</b>   | 6.31E-07 |
| ALWR | sf0114674675 | 1  | 14674675 | <b>5</b>   | 9.39E-11 |
| ALWR | sf0114715211 | 1  | 14715211 | <b>5</b>   | 3.36E-07 |
| ALWR | sf0114765895 | 1  | 14765895 | <b>5</b>   | 1.52E-07 |
| ALWR | sf0201313239 | 2  | 1313239  | <b>30</b>  | 2.64E-07 |
| ALWR | sf0214044855 | 2  | 14044855 | <b>42</b>  | 3.88E-08 |
| ALWR | sf0234971267 | 2  | 34971267 | <b>56</b>  | 9.55E-08 |
| ALWR | sf0305756733 | 3  | 5756733  | <b>62</b>  | 1.33E-07 |
| ALWR | sf0307967747 | 3  | 7967747  | <b>66</b>  | 1.03E-08 |
| ALWR | sf0314218985 | 3  | 14218985 | <b>69</b>  | 3.12E-07 |
| ALWR | sf0314311418 | 3  | 14311418 | <b>69</b>  | 9.08E-07 |
| ALWR | sf0335427520 | 3  | 35427520 | <b>84</b>  | 2.15E-07 |
| ALWR | sf0413658525 | 4  | 13658525 | <b>99</b>  | 4.23E-07 |
| ALWR | sf0421128220 | 4  | 21128220 | <b>105</b> | 2.42E-07 |
| ALWR | sf0503041512 | 5  | 3041512  | <b>118</b> | 3.60E-07 |
| ALWR | sf0510154318 | 5  | 10154318 | <b>125</b> | 1.00E-07 |
| ALWR | sf0525702444 | 5  | 25702444 | <b>136</b> | 5.33E-07 |
| ALWR | sf0609280147 | 6  | 9280147  | <b>147</b> | 1.13E-06 |
| ALWR | sf0619264960 | 6  | 19264960 | <b>156</b> | 3.48E-07 |
| ALWR | sf0700383598 | 7  | 383598   | <b>166</b> | 1.13E-06 |
| ALWR | sf0705652347 | 7  | 5652347  | <b>172</b> | 4.41E-08 |
| ALWR | sf0719010486 | 7  | 19010486 | <b>179</b> | 3.39E-07 |
| ALWR | sf0825631964 | 8  | 25631964 | <b>205</b> | 1.10E-06 |
| ALWR | sf0907139771 | 9  | 7139771  | <b>211</b> | 1.01E-06 |
| ALWR | sf1108434098 | 11 | 8434098  | <b>251</b> | 2.78E-07 |
| ALWR | sf1127347416 | 11 | 27347416 | <b>264</b> | 1.19E-06 |
| ALWR | sf1128403654 | 11 | 28403654 | <b>265</b> | 1.12E-06 |
| ALWR | sf1227298521 | 12 | 27298521 | <b>287</b> | 4.56E-09 |
| APAR | sf0108185933 | 1  | 8185933  | <b>2</b>   | 3.84E-08 |
| APAR | sf0114765895 | 1  | 14765895 | <b>5</b>   | 4.21E-07 |
| APAR | sf0114790584 | 1  | 14790584 | <b>5</b>   | 4.27E-12 |
| APAR | sf0119419292 | 1  | 19419292 | <b>9</b>   | 1.15E-06 |
| APAR | sf0121978536 | 1  | 21978536 | <b>10</b>  | 2.32E-07 |
| APAR | sf0127810782 | 1  | 27810782 | <b>12</b>  | 7.66E-07 |
| APAR | sf0141826241 | 1  | 41826241 | <b>29</b>  | 2.03E-08 |
| APAR | sf0201313239 | 2  | 1313239  | <b>30</b>  | 5.76E-09 |
| APAR | sf0214044855 | 2  | 14044855 | <b>42</b>  | 1.77E-09 |
| APAR | sf0234971267 | 2  | 34971267 | <b>56</b>  | 3.19E-07 |
| APAR | sf0305756733 | 3  | 5756733  | <b>62</b>  | 2.71E-10 |
| APAR | sf0307967747 | 3  | 7967747  | <b>66</b>  | 4.93E-10 |
| APAR | sf0314041177 | 3  | 14041177 | <b>69</b>  | 6.97E-07 |
| APAR | sf0325170818 | 3  | 25170818 | <b>76</b>  | 7.66E-07 |
| APAR | sf0330767955 | 3  | 30767955 | <b>80</b>  | 2.92E-07 |
| APAR | sf0335429346 | 3  | 35429346 | <b>84</b>  | 1.15E-06 |
| APAR | sf0401073573 | 4  | 1073573  | <b>85</b>  | 1.86E-07 |
| APAR | sf0401199801 | 4  | 1199801  | <b>85</b>  | 5.17E-08 |
| APAR | sf0413658525 | 4  | 13658525 | <b>99</b>  | 8.11E-10 |

|  |                   |              |    |          |            |          |             |
|--|-------------------|--------------|----|----------|------------|----------|-------------|
|  | APAR              | sf0431039801 | 4  | 31039801 | <b>109</b> | 5.54E-09 | <i>Nall</i> |
|  | APAR              | sf0526059024 | 5  | 26059024 | <b>137</b> | 6.11E-08 |             |
|  | APAR              | sf0604222011 | 6  | 4222011  | <b>143</b> | 1.16E-06 |             |
|  | APAR              | sf0611183488 | 6  | 11183488 | <b>148</b> | 4.82E-07 |             |
|  | APAR              | sf0613003646 | 6  | 13003646 | <b>151</b> | 2.79E-07 |             |
|  | APAR              | sf0705652347 | 7  | 5652347  | <b>172</b> | 2.77E-08 |             |
|  | APAR              | sf0708103740 | 7  | 8103740  | <b>173</b> | 3.96E-07 |             |
|  | APAR              | sf0724264482 | 7  | 24264482 | <b>183</b> | 1.66E-07 |             |
|  | APAR              | sf0813480582 | 8  | 13480582 | <b>194</b> | 7.64E-07 |             |
|  | APAR              | sf0821739186 | 8  | 21739186 | <b>201</b> | 6.33E-08 |             |
|  | APAR              | sf0917719915 | 9  | 17719915 | <b>222</b> | 3.27E-07 |             |
|  | APAR              | sf1102574411 | 11 | 2574411  | <b>243</b> | 1.62E-08 |             |
|  | APAR              | sf1106377393 | 11 | 6377393  | <b>247</b> | 1.12E-07 |             |
|  | APAR              | sf1127106642 | 11 | 27106642 | <b>263</b> | 2.41E-07 |             |
|  | APAR              | sf1200794496 | 12 | 794496   | <b>267</b> | 1.00E-06 |             |
|  | APAR              | sf1227298521 | 12 | 27298521 | <b>287</b> | 1.09E-10 |             |
|  | GLA               | sf0225036945 | 2  | 25036945 | <b>48</b>  | 3.15E-07 |             |
|  | GLA               | sf0502443333 | 5  | 2443333  | <b>117</b> | 9.30E-07 |             |
|  | GLA               | sf0528506264 | 5  | 28506264 | <b>138</b> | 1.50E-07 |             |
|  | GLA <sub>2</sub>  | sf1218880005 | 12 | 18880005 | <b>281</b> | 2.16E-07 |             |
|  | GLA <sub>2</sub>  | sf1219454172 | 12 | 19454172 | <b>282</b> | 1.02E-06 |             |
|  | GLA <sub>3</sub>  | sf0216114686 | 2  | 16114686 | <b>43</b>  | 1.08E-06 |             |
|  | GLA <sub>3</sub>  | sf0225036945 | 2  | 25036945 | <b>48</b>  | 6.39E-08 |             |
|  | GLA <sub>3</sub>  | sf0502443822 | 5  | 2443822  | <b>117</b> | 3.97E-07 |             |
|  | GLA <sub>3</sub>  | sf0528506264 | 5  | 28506264 | <b>138</b> | 1.69E-07 |             |
|  | GLA <sub>3</sub>  | sf0919753569 | 9  | 19753569 | <b>224</b> | 5.37E-07 |             |
|  | GLA <sub>4</sub>  | sf0211842901 | 2  | 11842901 | <b>40</b>  | 3.54E-07 |             |
|  | GLA <sub>4</sub>  | sf0219198685 | 2  | 19198685 | <b>44</b>  | 1.49E-07 |             |
|  | GLA <sub>4</sub>  | sf0224586397 | 2  | 24586397 | <b>47</b>  | 2.80E-07 |             |
|  | GLA <sub>4</sub>  | sf0224824076 | 2  | 24824076 | <b>47</b>  | 3.49E-08 |             |
|  | GLA <sub>4</sub>  | sf0401986876 | 4  | 1986876  | <b>86</b>  | 4.31E-08 |             |
|  | GLA <sub>4</sub>  | sf0407787724 | 4  | 7787724  | <b>94</b>  | 1.73E-07 |             |
|  | GLA <sub>4</sub>  | sf0414776838 | 4  | 14776838 | <b>100</b> | 4.47E-07 |             |
|  | GLA <sub>4</sub>  | sf0608186828 | 6  | 8186828  | <b>146</b> | 1.04E-07 |             |
|  | GLA <sub>4</sub>  | sf0622511858 | 6  | 22511858 | <b>159</b> | 1.25E-08 |             |
|  | GLA <sub>4</sub>  | sf0701026438 | 7  | 1026438  | <b>168</b> | 5.89E-09 |             |
|  | GLA <sub>4</sub>  | sf0701170356 | 7  | 1170356  | <b>168</b> | 4.79E-07 |             |
|  | GLA <sub>4</sub>  | sf0816934373 | 8  | 16934373 | <b>197</b> | 4.04E-07 |             |
|  | GLA <sub>4</sub>  | sf0828043934 | 8  | 28043934 | <b>208</b> | 4.03E-07 |             |
|  | GLA <sub>4</sub>  | sf1002331172 | 10 | 2331172  | <b>229</b> | 9.35E-09 |             |
|  | GLA <sub>4</sub>  | sf1106820100 | 11 | 6820100  | <b>248</b> | 9.02E-08 |             |
|  | GLA <sub>4</sub>  | sf1203270291 | 12 | 3270291  | <b>270</b> | 1.85E-07 |             |
|  | GLA <sub>4</sub>  | sf1204827025 | 12 | 4827025  | <b>272</b> | 1.12E-06 |             |
|  | GLAR              | sf0109768408 | 1  | 9768408  | <b>3</b>   | 6.75E-07 |             |
|  | GLAR              | sf0138139266 | 1  | 38139266 | <b>22</b>  | 1.18E-07 |             |
|  | GLAR              | sf0234629350 | 2  | 34629350 | <b>55</b>  | 6.63E-07 |             |
|  | GLAR              | sf0301144799 | 3  | 1144799  | <b>59</b>  | 7.61E-08 |             |
|  | GLAR              | sf0301511588 | 3  | 1511588  | <b>60</b>  | 7.31E-08 |             |
|  | GLAR              | sf0412542410 | 4  | 12542410 | <b>98</b>  | 1.03E-07 |             |
|  | GLAR              | sf0523183599 | 5  | 23183599 | <b>135</b> | 4.82E-07 |             |
|  | GLAR              | sf0615328125 | 6  | 15328125 | <b>153</b> | 5.24E-07 |             |
|  | GLAR              | sf0626208873 | 6  | 26208873 | <b>162</b> | 1.61E-07 |             |
|  | GLAR              | sf0700598680 | 7  | 598680   | <b>167</b> | 6.72E-07 |             |
|  | GLAR              | sf0700843455 | 7  | 843455   | <b>167</b> | 1.07E-06 |             |
|  | GLAR              | sf0801713963 | 8  | 1713963  | <b>189</b> | 1.86E-07 |             |
|  | GLAR              | sf0817690033 | 8  | 17690033 | <b>198</b> | 1.80E-07 |             |
|  | GLAR              | sf0817823673 | 8  | 17823673 | <b>198</b> | 2.22E-08 |             |
|  | GLAR              | sf1015417171 | 10 | 15417171 | <b>236</b> | 3.10E-07 |             |
|  | GLAR              | sf1107334672 | 11 | 7334672  | <b>249</b> | 2.52E-07 |             |
|  | GLAR <sub>2</sub> | sf0418833729 | 4  | 18833729 | <b>102</b> | 1.00E-06 |             |
|  | GLAR <sub>2</sub> | sf0507107863 | 5  | 7107863  | <b>120</b> | 2.39E-07 |             |
|  | GLAR <sub>3</sub> | sf0507107863 | 5  | 7107863  | <b>120</b> | 2.60E-07 |             |

|                   |              |    |          |     |          |
|-------------------|--------------|----|----------|-----|----------|
| GLAR <sub>3</sub> | sf0603243009 | 6  | 3243009  | 142 | 5.40E-08 |
| GLAR <sub>4</sub> | sf0122612616 | 1  | 22612616 | 11  | 3.78E-07 |
| GLAR <sub>4</sub> | sf0137777974 | 1  | 37777974 | 21  | 4.04E-09 |
| GLAR <sub>4</sub> | sf0204800916 | 2  | 4800916  | 33  | 9.14E-07 |
| GLAR <sub>4</sub> | sf0207792232 | 2  | 7792232  | 36  | 2.17E-07 |
| GLAR <sub>4</sub> | sf0216141744 | 2  | 16141744 | 43  | 1.04E-06 |
| GLAR <sub>4</sub> | sf0227136932 | 2  | 27136932 | 50  | 8.56E-07 |
| GLAR <sub>4</sub> | sf0401930451 | 4  | 1930451  | 86  | 3.15E-08 |
| GLAR <sub>4</sub> | sf0405015647 | 4  | 5015647  | 91  | 3.34E-08 |
| GLAR <sub>4</sub> | sf0420154357 | 4  | 20154357 | 104 | 4.39E-07 |
| GLAR <sub>4</sub> | sf0433609350 | 4  | 33609350 | 114 | 2.59E-08 |
| GLAR <sub>4</sub> | sf0529691765 | 5  | 29691765 | 141 | 3.33E-08 |
| GLAR <sub>4</sub> | sf0608270810 | 6  | 8270810  | 146 | 7.97E-10 |
| GLAR <sub>4</sub> | sf0620800068 | 6  | 20800068 | 158 | 3.52E-08 |
| GLAR <sub>4</sub> | sf0622496123 | 6  | 22496123 | 159 | 1.21E-06 |
| GLAR <sub>4</sub> | sf0622511851 | 6  | 22511851 | 159 | 2.09E-11 |
| GLAR <sub>4</sub> | sf0625540899 | 6  | 25540899 | 161 | 1.06E-07 |
| GLAR <sub>4</sub> | sf0704244483 | 7  | 4244483  | 170 | 4.92E-10 |
| GLAR <sub>4</sub> | sf0816934373 | 8  | 16934373 | 197 | 2.45E-07 |
| GLAR <sub>4</sub> | sf0825307574 | 8  | 25307574 | 204 | 6.13E-08 |
| GLAR <sub>4</sub> | sf0919250139 | 9  | 19250139 | 223 | 1.33E-07 |
| GLAR <sub>4</sub> | sf1003001590 | 10 | 3001590  | 230 | 3.05E-08 |
| GLAR <sub>4</sub> | sf1017644195 | 10 | 17644195 | 237 | 8.83E-08 |
| GLAR <sub>4</sub> | sf1203637332 | 12 | 3637332  | 271 | 5.32E-07 |
| GLAR <sub>4</sub> | sf1212008851 | 12 | 12008851 | 277 | 2.49E-08 |
| GLCC              | sf0327935961 | 3  | 27935961 | 79  | 2.75E-07 |
| GLCC              | sf0401731355 | 4  | 1731355  | 86  | 1.75E-07 |
| GLCC              | sf0402415033 | 4  | 2415033  | 88  | 4.79E-07 |
| GLCC              | sf0529691765 | 5  | 29691765 | 141 | 3.15E-07 |
| GLCC              | sf0622511851 | 6  | 22511851 | 159 | 8.93E-07 |
| LLSD              | sf0814027825 | 8  | 14027825 | 290 | 8.87E-08 |
| LLSD              | sf0912562314 | 9  | 12562314 | 216 | 5.19E-07 |
| LLSD              | sf1121880654 | 11 | 21880654 | 291 | 8.31E-07 |
| LN                | sf0211842901 | 2  | 11842901 | 40  | 5.46E-07 |
| LN                | sf0608228082 | 6  | 8228082  | 146 | 4.05E-07 |
| LN                | sf0608233257 | 6  | 8233257  | 146 | 1.01E-06 |
| LN                | sf0716469200 | 7  | 16469200 | 177 | 7.09E-08 |
| LN                | sf0820734571 | 8  | 20734571 | 200 | 9.29E-07 |
| LWSD              | sf0117769123 | 1  | 17769123 | 7   | 1.21E-06 |
| LWSD              | sf0225081784 | 2  | 25081784 | 48  | 1.95E-07 |
| LWSD              | sf0318071699 | 3  | 18071699 | 71  | 1.09E-06 |
| LWSD              | sf0332115908 | 3  | 32115908 | 81  | 4.43E-07 |
| LWSD              | sf0422737268 | 4  | 22737268 | 106 | 9.41E-07 |
| LWSD              | sf0427563863 | 4  | 27563863 | 107 | 5.43E-10 |
| LWSD              | sf0520774778 | 5  | 20774778 | 133 | 8.42E-07 |
| LWSD              | sf0625269478 | 6  | 25269478 | 161 | 4.73E-07 |
| LWSD              | sf0626208873 | 6  | 26208873 | 162 | 6.12E-07 |
| LWSD              | sf0630219773 | 6  | 30219773 | 163 | 7.92E-08 |
| LWSD              | sf0702345742 | 7  | 2345742  | 169 | 1.40E-08 |
| LWSD              | sf0718598941 | 7  | 18598941 | 178 | 7.39E-07 |
| LWSD              | sf0719554750 | 7  | 19554750 | 180 | 1.98E-08 |
| LWSD              | sf0815540826 | 8  | 15540826 | 196 | 4.47E-07 |
| LWSD              | sf0908334292 | 9  | 8334292  | 212 | 9.20E-07 |
| LWSD              | sf0911267191 | 9  | 11267191 | 215 | 8.07E-07 |
| LWSD              | sf1012820814 | 10 | 12820814 | 235 | 8.32E-07 |
| LWSD              | sf1020434982 | 10 | 20434982 | 239 | 1.17E-06 |
| LWSD              | sf1100412783 | 11 | 412783   | 242 | 2.48E-07 |
| LWSD              | sf1112834088 | 11 | 12834088 | 252 | 1.92E-07 |
| LWSD              | sf1126108571 | 11 | 26108571 | 261 | 3.17E-08 |
| LWSD              | sf1200141009 | 12 | 141009   | 266 | 4.08E-07 |
| LWSD              | sf1204927416 | 12 | 4927416  | 272 | 1.86E-07 |
| LWSD              | sf0116862977 | 1  | 16862977 | 288 | 1.11E-06 |

OSH43

NAL3

|      |              |    |          |            |          |             |
|------|--------------|----|----------|------------|----------|-------------|
| MLA  | sf0402013312 | 4  | 2013312  | <b>86</b>  | 2.59E-09 |             |
| MLA  | sf0402535451 | 4  | 2535451  | <b>88</b>  | 2.49E-07 |             |
| MLA  | sf0402885417 | 4  | 2885417  | <b>89</b>  | 1.23E-07 |             |
| MLA  | sf0404373124 | 4  | 4373124  | <b>90</b>  | 2.64E-07 |             |
| MLA  | sf0431688816 | 4  | 31688816 | <b>111</b> | 3.74E-07 |             |
| MLA  | sf0431731166 | 4  | 31731166 | <b>111</b> | 7.55E-07 |             |
| MLA  | sf0620743996 | 6  | 20743996 | <b>158</b> | 7.17E-07 |             |
| MLA  | sf0710949944 | 7  | 10949944 | <b>174</b> | 1.07E-06 |             |
| MLA  | sf0720571685 | 7  | 20571685 | <b>182</b> | 9.39E-07 |             |
| MLA  | sf0724561303 | 7  | 24561303 | <b>184</b> | 1.08E-07 |             |
| MLA  | sf0908518957 | 9  | 8518957  | <b>213</b> | 1.08E-06 |             |
| MLA  | sf0912562314 | 9  | 12562314 | <b>216</b> | 4.35E-08 |             |
| MLA  | sf1001305024 | 10 | 1305024  | <b>228</b> | 8.92E-08 |             |
| MLA  | sf1100512380 | 11 | 512380   | <b>242</b> | 5.44E-07 |             |
| MLA  | sf1117763526 | 11 | 17763526 | <b>255</b> | 5.84E-07 |             |
| MLA  | sf1208135880 | 12 | 8135880  | <b>274</b> | 9.59E-07 |             |
| MLA  | sf1217534035 | 12 | 17534035 | <b>280</b> | 6.20E-07 |             |
| MLC  | sf0108340715 | 1  | 8340715  | <b>2</b>   | 6.26E-07 |             |
| MLC  | sf0219191723 | 2  | 19191723 | <b>44</b>  | 1.14E-06 |             |
| MLC  | sf0224656597 | 2  | 24656597 | <b>47</b>  | 6.49E-08 |             |
| MLC  | sf0509638422 | 5  | 9638422  | <b>124</b> | 7.77E-07 |             |
| MLC  | sf0614927674 | 6  | 14927674 | <b>152</b> | 1.96E-08 |             |
| MLC  | sf0623142861 | 6  | 23142861 | <b>160</b> | 9.32E-07 |             |
| MLC  | sf0700595552 | 7  | 595552   | <b>167</b> | 1.05E-06 |             |
| MLL  | sf0137065930 | 1  | 37065930 | <b>20</b>  | 1.28E-07 |             |
| MLL  | sf0431177805 | 4  | 31177805 | <b>109</b> | 3.84E-07 | <i>Nall</i> |
| MLP  | sf0319496982 | 3  | 19496982 | <b>72</b>  | 1.19E-06 |             |
| MLP  | sf0912562314 | 9  | 12562314 | <b>216</b> | 8.03E-07 |             |
| MLP  | sf0919274354 | 9  | 19274354 | <b>223</b> | 1.04E-06 |             |
| MLP  | sf1117763526 | 11 | 17763526 | <b>255</b> | 9.07E-08 |             |
| MLRA | sf0805320783 | 8  | 5320783  | <b>191</b> | 1.98E-07 |             |
| MLRA | sf0912562314 | 9  | 12562314 | <b>216</b> | 9.05E-08 |             |
| MLRA | sf1125096468 | 11 | 25096468 | <b>260</b> | 6.61E-07 |             |
| MLW  | sf0307235728 | 3  | 7235728  | <b>65</b>  | 5.41E-07 |             |
| MLW  | sf0327165381 | 3  | 27165381 | <b>77</b>  | 7.52E-07 |             |
| MLW  | sf0805320783 | 8  | 5320783  | <b>191</b> | 9.19E-07 |             |
| MLWR | sf0130150859 | 1  | 30150859 | <b>15</b>  | 3.47E-07 |             |
| MLWR | sf0138432053 | 1  | 38432053 | <b>23</b>  | 2.35E-08 |             |
| MLWR | sf0219185409 | 2  | 19185409 | <b>44</b>  | 1.74E-08 |             |
| MLWR | sf0508177876 | 5  | 8177876  | <b>121</b> | 4.59E-07 |             |
| MLWR | sf0508616303 | 5  | 8616303  | <b>122</b> | 2.74E-07 |             |
| MLWR | sf0509154430 | 5  | 9154430  | <b>123</b> | 4.05E-07 |             |
| MPAR | sf0141826241 | 1  | 41826241 | <b>29</b>  | 8.32E-07 |             |
| MPAR | sf0306154166 | 3  | 6154166  | <b>63</b>  | 2.95E-07 |             |
| MPAR | sf0431039801 | 4  | 31039801 | <b>109</b> | 1.11E-06 | <i>Nall</i> |
| MPAR | sf0715963842 | 7  | 15963842 | <b>176</b> | 6.70E-07 |             |
| MPAR | sf0824096072 | 8  | 24096072 | <b>203</b> | 2.82E-07 |             |
| MPAR | sf1227298521 | 12 | 27298521 | <b>287</b> | 9.69E-08 |             |
| TLA  | sf0225036945 | 2  | 25036945 | <b>48</b>  | 4.22E-07 |             |
| TLA  | sf0528506264 | 5  | 28506264 | <b>138</b> | 7.30E-08 |             |

---

Supplementary table S4 GWAS results with the significant *P* value threshold

| Stage                | Trait             | Lead SNP ID  | Chr.     | Position (MSU6.1) | Locus ID   | <i>P</i> value | Reference allele | Major allele | Minor allele | <i>R</i> <sup>2</sup> (%) <sup>a</sup> | Effect size (s.d.) <sup>b</sup> | Known genes |
|----------------------|-------------------|--------------|----------|-------------------|------------|----------------|------------------|--------------|--------------|----------------------------------------|---------------------------------|-------------|
|                      | GLA <sub>2</sub>  | sf0114653019 | 1        | 14653019          | <b>5</b>   | 9.61E-09       | T                | T            | C            | 6.80                                   | 1.01                            |             |
|                      | GLA <sub>2</sub>  | sf0137212688 | 1        | 37212688          | <b>20</b>  | 1.06E-08       | T                | G            | T            | 7.26                                   | -1.41                           |             |
|                      | GLA <sub>2</sub>  | sf0207484769 | 2        | 7484769           | <b>35</b>  | 8.12E-09       | G                | G            | A            | 7.12                                   | 1.33                            |             |
|                      | GLA <sub>2</sub>  | sf0331940902 | 3        | 31940902          | <b>81</b>  | 7.56E-09       | T                | C            | T            | 6.84                                   | -1.81                           |             |
|                      | GLA <sub>2</sub>  | sf0313954229 | 3        | 13954229          | <b>69</b>  | 5.55E-08       | G                | A            | G            | 6.21                                   | -1.07                           |             |
|                      | GLA <sub>2</sub>  | sf0305695371 | 3        | 5695371           | <b>62</b>  | 4.50E-08       | G                | T            | G            | 5.96                                   | -0.87                           |             |
|                      | GLA <sub>2</sub>  | sf0406027943 | 4        | 6027943           | <b>93</b>  | 2.94E-10       | C                | C            | T            | 8.16                                   | 1.04                            |             |
|                      | GLA <sub>2</sub>  | sf0516433687 | 5        | 16433687          | <b>130</b> | 1.76E-09       | T                | T            | A            | 7.42                                   | 1.28                            |             |
|                      | GLA <sub>2</sub>  | sf0525748215 | 5        | 25748215          | <b>136</b> | 8.10E-09       | T                | T            | G            | 6.86                                   | 2.36                            |             |
|                      | GLA <sub>2</sub>  | sf0502421097 | 5        | 2421097           | <b>117</b> | 2.89E-09       | G                | G            | A            | 7.83                                   | 0.93                            |             |
|                      | GLA <sub>2</sub>  | sf0513728565 | 5        | 13728565          | <b>126</b> | 5.48E-12       | C                | C            | T            | 10.06                                  | 1.59                            |             |
|                      | GLA <sub>2</sub>  | sf0630583038 | 6        | 30583038          | <b>164</b> | 4.66E-08       | C                | C            | T            | 6.00                                   | 1.07                            |             |
|                      | GLA <sub>2</sub>  | sf0700219702 | 7        | 219702            | <b>166</b> | 4.36E-09       | G                | G            | T            | 5.88                                   | 1.07                            |             |
|                      | GLA <sub>2</sub>  | sf0711200104 | 7        | 11200104          | <b>174</b> | 1.43E-09       | A                | C            | A            | 7.70                                   | -0.76                           |             |
|                      | GLA <sub>2</sub>  | sf0826476003 | 8        | 26476003          | <b>206</b> | 1.47E-10       | G                | G            | A            | 8.56                                   | 0.99                            |             |
|                      | GLA <sub>2</sub>  | sf0804368745 | 8        | 4368745           | <b>190</b> | 3.05E-09       | A                | T            | A            | 7.10                                   | -1.27                           |             |
|                      | GLA <sub>2</sub>  | sf0905443985 | 9        | 5443985           | <b>210</b> | 1.44E-08       | C                | C            | T            | 6.74                                   | 0.92                            |             |
|                      | GLA <sub>2</sub>  | sf1022775806 | 10       | 22775806          | <b>241</b> | 2.23E-09       | C                | C            | T            | 7.07                                   | 1.11                            |             |
|                      | GLA <sub>2</sub>  | sf1126753044 | 11       | 26753044          | <b>262</b> | 1.73E-08       | C                | C            | T            | 8.18                                   | 1.12                            |             |
|                      | GLA <sub>2</sub>  | sf1215668235 | 12       | 15668235          | <b>279</b> | 1.21E-08       | C                | C            | T            | 7.02                                   | 0.96                            |             |
| Late tillering stage | GLA <sub>2</sub>  | sf1224620960 | 12       | 24620960          | <b>284</b> | 4.50E-09       | C                | C            | A            | 7.46                                   | 1.06                            |             |
|                      | GLA <sub>2</sub>  | sf1202270243 | 12       | 2270243           | <b>269</b> | 7.19E-09       | C                | T            | C            | 7.15                                   | -0.89                           |             |
|                      | GLA <sub>3</sub>  | sf0514281006 | 5        | 14281006          | <b>127</b> | 5.20E-08       | A                | A            | G            | 6.83                                   | 1.06                            |             |
|                      | GLAR              | sf0129629431 | 1        | 29629431          | <b>14</b>  | 2.14E-10       | G                | G            | A            | 8.23                                   | 2.22                            |             |
|                      | GLAR              | sf0323995809 | 3        | 23995809          | <b>74</b>  | 1.31E-09       | G                | G            | T            | 7.58                                   | 1.92                            |             |
|                      | GLAR              | sf0616715458 | 6        | 16715458          | <b>154</b> | 4.60E-08       | T                | T            | C            | 2.71                                   | 1.22                            |             |
|                      | GLAR              | sf1106112328 | 11       | 6112328           | <b>246</b> | 2.48E-08       | G                | G            | A            | 6.46                                   | 2.02                            |             |
|                      | GLAR <sub>3</sub> | sf0529205395 | 5        | 29205395          | <b>140</b> | 2.65E-08       | C                | C            | T            | 6.58                                   | 1.15                            |             |
|                      | GLAR <sub>3</sub> | sf0708241028 | 7        | 8241028           | <b>173</b> | 1.62E-08       | T                | T            | C            | 6.85                                   | 1.05                            |             |
|                      | GLAR <sub>3</sub> | sf0719639267 | 7        | 19639267          | <b>180</b> | 1.94E-13       | T                | C            | T            | 11.23                                  | -1.35                           |             |
| GLAR <sub>3</sub>    | sf0719817763      | 7            | 19817763 | <b>180</b>        | 6.19E-11   | G              | G                | T            | 9.00         | -1.25                                  |                                 |             |
| GLAR <sub>3</sub>    | sf0719728350      | 7            | 19728350 | <b>180</b>        | 3.62E-08   | G              | G                | A            | 7.32         | -0.66                                  |                                 |             |

|                    |                   |              |              |          |            |            |          |   |   |       |       |               |  |
|--------------------|-------------------|--------------|--------------|----------|------------|------------|----------|---|---|-------|-------|---------------|--|
|                    | GLAR <sub>3</sub> | sf0719933345 | 7            | 19933345 | <b>181</b> | 5.54E-08   | T        | T | C | 6.29  | -0.69 |               |  |
|                    | GLAR <sub>3</sub> | sf1117150282 | 11           | 17150282 | <b>254</b> | 2.07E-10   | C        | C | T | 8.50  | 1.33  |               |  |
|                    | GLAR <sub>4</sub> | sf0719859898 | 7            | 19859898 | <b>181</b> | 8.10E-11   | T        | C | T | 8.93  | 1.01  |               |  |
|                    | GLAR <sub>4</sub> | sf0719732764 | 7            | 19732764 | <b>180</b> | 1.02E-08   | C        | C | T | 7.00  | 0.84  |               |  |
|                    | GLCC              | sf0719639464 | 7            | 19639464 | <b>180</b> | 4.43E-09   | T        | C | T | 7.31  | 1.08  |               |  |
|                    | LLSD              | sf1011328985 | 10           | 11328985 | <b>233</b> | 3.25E-08   | T        | C | T | 6.48  | 1.09  |               |  |
|                    | LWSD              | sf0203791234 | 2            | 3791234  | <b>31</b>  | 6.91E-09   | A        | A | G | 3.15  | 1.38  |               |  |
|                    | LWSD              | sf0514011442 | 5            | 14011442 | <b>127</b> | 1.27E-08   | C        | C | A | 3.44  | 1.69  |               |  |
|                    | LWSD              | sf0528903428 | 5            | 28903428 | <b>139</b> | 4.99E-09   | G        | G | A | 4.12  | 1.88  |               |  |
|                    | LWSD              | sf0606820810 | 6            | 6820810  | <b>144</b> | 8.94E-10   | C        | C | T | 5.16  | 3.09  |               |  |
|                    | LWSD              | sf1127580568 | 11           | 27580568 | <b>264</b> | 4.61E-09   | A        | A | T | 6.68  | 1.17  |               |  |
|                    | MLW               | sf1105896366 | 11           | 5896366  | <b>246</b> | 4.41E-08   | C        | C | A | 6.34  | 0.72  |               |  |
|                    | ALL               | sf1225286279 | 12           | 25286279 | <b>285</b> | 5.54E-08   | G        | G | A | 6.20  | -0.69 | <i>OsIAA3</i> |  |
|                    | ALL               | sf1225260606 | 12           | 25260606 | <b>285</b> | 4.31E-09   | A        | T | A | 7.25  | -0.74 | <i>OsIAA3</i> |  |
|                    | ALP               | sf1225286279 | 12           | 25286279 | <b>285</b> | 4.68E-08   | G        | G | A | 6.23  | -0.69 | <i>OsIAA3</i> |  |
|                    | ALP               | sf1225260606 | 12           | 25260606 | <b>285</b> | 6.09E-09   | A        | T | A | 7.05  | -0.74 | <i>OsIAA3</i> |  |
|                    | ALWR              | sf0402803386 | 4            | 2803386  | <b>89</b>  | 4.71E-09   | A        | A | G | 7.03  | 0.71  |               |  |
| Late booting stage | ALWR              | sf0727101845 | 7            | 27101845 | <b>187</b> | 2.72E-08   | C        | C | A | 6.33  | -1.15 |               |  |
|                    | GLA               | sf0431688161 | 4            | 31688161 | <b>111</b> | 1.52E-08   | C        | C | T | 6.94  | 0.98  |               |  |
|                    | GLA <sub>2</sub>  | sf0620927842 | 6            | 20927842 | <b>158</b> | 1.52E-08   | G        | G | A | 6.17  | 1.05  |               |  |
|                    | GLAR              | sf0216062250 | 2            | 16062250 | <b>43</b>  | 3.46E-08   | T        | C | T | 6.22  | -1.46 |               |  |
|                    | GLAR <sub>4</sub> | sf0620856382 | 6            | 20856382 | <b>158</b> | 6.95E-09   | A        | G | A | 6.72  | -1.02 |               |  |
|                    | LN                | sf0431688161 | 4            | 31688161 | <b>111</b> | 6.07E-09   | C        | C | T | 7.20  | 0.99  |               |  |
|                    | MPAR              | sf0619381533 | 6            | 19381533 | <b>156</b> | 1.59E-08   | C        | C | T | 5.70  | 0.92  |               |  |
|                    | TLA               | sf0431688161 | 4            | 31688161 | <b>111</b> | 1.27E-08   | C        | C | T | 7.00  | 0.98  |               |  |
|                    |                   | ALRA         | sf0821777242 | 8        | 21777242   | <b>201</b> | 4.74E-08 | T | C | T     | 7.41  | 1.14          |  |
|                    |                   | ALW          | sf0821739186 | 8        | 21739186   | <b>201</b> | 5.17E-08 | T | C | T     | 7.26  | 1.19          |  |
|                    | ALWR              | sf0114674675 | 1            | 14674675 | <b>5</b>   | 9.39E-11   | A        | G | A | 10.37 | 1.43  |               |  |
|                    | ALWR              | sf0214044855 | 2            | 14044855 | <b>42</b>  | 3.88E-08   | G        | G | A | 7.74  | -2.16 |               |  |
|                    | ALWR              | sf0307967747 | 3            | 7967747  | <b>66</b>  | 1.03E-08   | C        | C | T | 8.27  | -2.15 |               |  |
|                    | ALWR              | sf0705652347 | 7            | 5652347  | <b>172</b> | 4.41E-08   | A        | A | T | 7.47  | -2.29 |               |  |
|                    | ALWR              | sf1227298521 | 12           | 27298521 | <b>287</b> | 4.56E-09   | A        | A | G | 8.56  | 1.21  |               |  |
|                    | APAR              | sf0108185933 | 1            | 8185933  | <b>2</b>   | 3.84E-08   | G        | G | T | 7.61  | -2.28 |               |  |
|                    | APAR              | sf0141826241 | 1            | 41826241 | <b>29</b>  | 2.03E-08   | A        | C | A | 7.49  | -0.91 |               |  |
|                    | APAR              | sf0114790584 | 1            | 14790584 | <b>5</b>   | 4.27E-12   | T        | C | T | 11.74 | 1.61  |               |  |
|                    | APAR              | sf0201313239 | 2            | 1313239  | <b>30</b>  | 5.76E-09   | G        | G | T | 8.40  | -2.52 |               |  |



|                                 |                   |              |          |            |            |          |   |   |      |       |       |             |
|---------------------------------|-------------------|--------------|----------|------------|------------|----------|---|---|------|-------|-------|-------------|
|                                 | APAR              | sf0214044855 | 2        | 14044855   | <b>42</b>  | 1.77E-09 | G | G | A    | 9.05  | -2.44 |             |
|                                 | APAR              | sf0307967747 | 3        | 7967747    | <b>66</b>  | 4.93E-10 | C | C | T    | 9.79  | -2.46 |             |
|                                 | APAR              | sf0305756733 | 3        | 5756733    | <b>62</b>  | 2.71E-10 | T | C | T    | 10.14 | 2.06  |             |
|                                 | APAR              | sf0413658525 | 4        | 13658525   | <b>99</b>  | 8.11E-10 | T | T | C    | 9.37  | -2.88 |             |
|                                 | APAR              | sf0431039801 | 4        | 31039801   | <b>109</b> | 5.54E-09 | A | A | G    | 8.19  | 1.33  | <i>Nall</i> |
|                                 | APAR              | sf0401199801 | 4        | 1199801    | <b>85</b>  | 5.17E-08 | A | A | T    | 7.16  | 0.99  |             |
|                                 | APAR              | sf0705652347 | 7        | 5652347    | <b>172</b> | 2.77E-08 | A | A | T    | 7.69  | -2.42 |             |
|                                 | APAR              | sf1102574411 | 11       | 2574411    | <b>243</b> | 1.62E-08 | T | C | T    | 7.81  | -1.41 |             |
|                                 | APAR              | sf1227298521 | 12       | 27298521   | <b>287</b> | 1.09E-10 | A | A | G    | 10.47 | 1.41  |             |
|                                 | GLA <sub>4</sub>  | sf0224824076 | 2        | 24824076   | <b>47</b>  | 3.49E-08 | C | C | T    | 7.56  | 1.39  |             |
|                                 | GLA <sub>4</sub>  | sf0401986876 | 4        | 1986876    | <b>86</b>  | 4.31E-08 | C | A | C    | 7.44  | -1.07 |             |
| <b>Milk<br/>Grain<br/>stage</b> | GLA <sub>4</sub>  | sf0622511858 | 6        | 22511858   | <b>159</b> | 1.25E-08 | T | C | T    | 8.88  | -1.16 |             |
|                                 | GLA <sub>4</sub>  | sf0701026438 | 7        | 1026438    | <b>168</b> | 5.89E-09 | T | C | T    | 8.32  | -1.33 |             |
|                                 | GLA <sub>4</sub>  | sf1002331172 | 10       | 2331172    | <b>229</b> | 9.35E-09 | G | G | C    | 8.21  | 1.24  |             |
|                                 | GLAR              | sf0817823673 | 8        | 17823673   | <b>198</b> | 2.22E-08 | G | C | G    | 7.61  | -0.91 |             |
|                                 | GLAR <sub>3</sub> | sf0603243009 | 6        | 3243009    | <b>142</b> | 5.40E-08 | C | C | A    | 7.10  | -0.80 |             |
|                                 | GLAR <sub>4</sub> | sf0137777974 | 1        | 37777974   | <b>21</b>  | 4.04E-09 | T | T | C    | 8.46  | 1.34  |             |
|                                 | GLAR <sub>4</sub> | sf0433609350 | 4        | 33609350   | <b>114</b> | 2.59E-08 | T | C | T    | 7.61  | -1.21 |             |
|                                 | GLAR <sub>4</sub> | sf0401930451 | 4        | 1930451    | <b>86</b>  | 3.15E-08 | A | T | A    | 7.40  | -1.11 |             |
|                                 | GLAR <sub>4</sub> | sf0405015647 | 4        | 5015647    | <b>91</b>  | 3.34E-08 | A | G | A    | 7.58  | -0.95 |             |
|                                 | GLAR <sub>4</sub> | sf0529691765 | 5        | 29691765   | <b>141</b> | 3.33E-08 | A | T | A    | 7.45  | -1.11 |             |
|                                 | GLAR <sub>4</sub> | sf0608270810 | 6        | 8270810    | <b>146</b> | 7.97E-10 | A | G | A    | 9.24  | -1.27 |             |
|                                 | GLAR <sub>4</sub> | sf0622511851 | 6        | 22511851   | <b>159</b> | 2.09E-11 | T | C | T    | 10.91 | -1.18 |             |
|                                 | GLAR <sub>4</sub> | sf0620800068 | 6        | 20800068   | <b>158</b> | 3.52E-08 | T | C | T    | 7.49  | -1.07 |             |
|                                 | GLAR <sub>4</sub> | sf0704244483 | 7        | 4244483    | <b>170</b> | 4.92E-10 | C | C | T    | 9.46  | 1.40  |             |
|                                 | GLAR <sub>4</sub> | sf1003001590 | 10       | 3001590    | <b>230</b> | 3.05E-08 | A | G | A    | 6.94  | -1.15 |             |
|                                 | GLAR <sub>4</sub> | sf1212008851 | 12       | 12008851   | <b>277</b> | 2.49E-08 | G | C | G    | 7.08  | -1.06 |             |
|                                 | LWSD              | sf0427563863 | 4        | 27563863   | <b>107</b> | 5.43E-10 | A | A | G    | 9.18  | -1.19 |             |
|                                 | LWSD              | sf0719554750 | 7        | 19554750   | <b>180</b> | 1.98E-08 | G | G | A    | 7.82  | 1.48  |             |
|                                 | LWSD              | sf0702345742 | 7        | 2345742    | <b>169</b> | 1.40E-08 | T | T | C    | 6.75  | 1.78  |             |
|                                 | LWSD              | sf1126108571 | 11       | 26108571   | <b>261</b> | 3.17E-08 | T | T | C    | 6.01  | 1.04  |             |
| MLA                             | sf0402013312      | 4            | 2013312  | <b>86</b>  | 2.59E-09   | C        | C | T | 8.75 | 1.43  |       |             |
| MLA                             | sf0912562314      | 9            | 12562314 | <b>216</b> | 4.35E-08   | C        | C | T | 7.40 | 1.23  |       |             |
| MLC                             | sf0614927674      | 6            | 14927674 | <b>152</b> | 1.96E-08   | C        | C | T | 6.92 | 2.00  |       |             |
| MLWR                            | sf0138432053      | 1            | 38432053 | <b>23</b>  | 2.35E-08   | C        | C | T | 7.67 | -0.88 |       |             |
| MLWR                            | sf0219185409      | 2            | 19185409 | <b>44</b>  | 1.74E-08   | G        | G | A | 7.84 | 0.69  |       |             |

<sup>a</sup>R<sup>2</sup> (%), proportion of variation explained by a SNP, calculated as SS of a lead SNP (after fitting all other model terms) / SS of total, where SS stands for sum of squares.

<sup>b</sup>Effect size is expressed as the ratio of absolute effect size / corresponding phenotypic standard deviation

**Supplementary table S5 All the potential candidate genes within 100-kb upstream and downstream of the lead SNP sf0719639267.**

| <b>Start</b> | <b>End</b> | <b>Annotation</b>                                              | <b>LOC</b>     |
|--------------|------------|----------------------------------------------------------------|----------------|
| 19540488     | 19544813   | DNA repair protein rhp16__putative__expressed;                 | LOC_Os07g32730 |
| 19560051     | 19562113   | transposon protein__putative__CACTA__En/Spm sub-class;         | LOC_Os07g32740 |
| 19566706     | 19574595   | transposon protein__putative__CACTA__En/Spm sub-class;         | LOC_Os07g32750 |
| 19592349     | 19594226   | hypothetical protein;                                          | LOC_Os07g32761 |
| 19597514     | 19608052   | chorismate mutase/prephenate dehydratase__putative__expressed; | LOC_Os07g32774 |
| 19613248     | 19616481   | ankyrin repeat domain containing protein__expressed;           | LOC_Os07g32790 |
| 19624532     | 19627300   | autophagy-related protein__putative__expressed;                | LOC_Os07g32800 |
| 19630213     | 19630689   | conserved hypothetical protein;                                | LOC_Os07g32810 |
| 19633395     | 19633709   | hypothetical protein;                                          | LOC_Os07g32820 |
| 19639898     | 19640377   | hypothetical protein;                                          | LOC_Os07g32830 |
| 19645851     | 19646315   | hypothetical protein;                                          | LOC_Os07g32839 |
| 19649497     | 19649985   | hypothetical protein;                                          | LOC_Os07g32850 |
| 19653850     | 19654365   | hypothetical protein;                                          | LOC_Os07g32870 |
| 19654998     | 19656610   | ATP synthase gamma chain__putative__expressed;                 | LOC_Os07g32880 |
| 19657126     | 19667113   | 3'-5' exonuclease, putative, expressed                         | LOC_Os07g32890 |
| 19667385     | 19672215   | PPR repeat containing protein__expressed;                      | LOC_Os07g32900 |
| 19673075     | 19679440   | transposon protein__putative__unclassified__expressed;         | LOC_Os07g32910 |
| 19681831     | 19683646   | expressed protein;                                             | LOC_Os07g32920 |
| 19689863     | 19690267   | hypothetical protein;                                          | LOC_Os07g32940 |
| 19691311     | 19694414   | dnaJ C terminal region family protein__expressed;              | LOC_Os07g32950 |
| 19695406     | 19695894   | hypothetical protein;                                          | LOC_Os07g32960 |
| 19697839     | 19698359   | hypothetical protein;                                          | LOC_Os07g32970 |
| 19702564     | 19703028   | hypothetical protein;                                          | LOC_Os07g32979 |
| 19708491     | 19708970   | hypothetical protein;                                          | LOC_Os07g32990 |
| 19712202     | 19715342   | retrotransposon protein__putative__unclassified;               | LOC_Os07g33000 |
| 19716466     | 19722621   | retrotransposon protein__putative__unclassified;               | LOC_Os07g33010 |
| 19726313     | 19727150   | hypothetical protein;                                          | LOC_Os07g33020 |
| 19730852     | 19731535   | hypothetical protein;                                          | LOC_Os07g33030 |
| 19735461     | 19735961   | hypothetical protein;                                          | LOC_Os07g33040 |

**Supplementary Table S6 Association analysis of *Nall* with ALWR at the late booting stage.**

| SNP          | Chr | Position | <i>P</i> value | <i>R</i> <sup>2</sup> (%)* |
|--------------|-----|----------|----------------|----------------------------|
| sf0431027691 | 4   | 31027691 | 3.77E-04       | 2.77                       |
| sf0431020323 | 4   | 31020323 | 3.86E-02       | 0.93                       |
| sf0431029369 | 4   | 31029369 | 7.75E-02       | 0.68                       |
| sf0431018731 | 4   | 31018731 | 1.82E-01       | 0.40                       |
| sf0431027517 | 4   | 31027517 | 2.66E-01       | 0.27                       |
| sf0431020320 | 4   | 31020320 | 2.66E-01       | 0.27                       |
| sf0431019560 | 4   | 31019560 | 2.67E-01       | 0.27                       |
| sf0431027456 | 4   | 31027456 | 2.67E-01       | 0.27                       |
| sf0431029618 | 4   | 31029618 | 2.91E-01       | 0.24                       |
| sf0431028935 | 4   | 31028935 | 2.91E-01       | 0.24                       |
| sf0431028909 | 4   | 31028909 | 2.91E-01       | 0.24                       |
| sf0431027536 | 4   | 31027536 | 3.50E-01       | 0.19                       |
| sf0431028704 | 4   | 31028704 | 3.50E-01       | 0.19                       |
| sf0431019377 | 4   | 31019377 | 3.68E-01       | 0.18                       |
| sf0431019357 | 4   | 31019357 | 3.95E-01       | 0.16                       |
| sf0431029574 | 4   | 31029574 | 4.37E-01       | 0.13                       |
| sf0431026911 | 4   | 31026911 | 4.91E-01       | 0.10                       |
| sf0431029413 | 4   | 31029413 | 5.43E-01       | 0.08                       |
| sf0431027379 | 4   | 31027379 | 5.44E-01       | 0.08                       |
| sf0431019954 | 4   | 31019954 | 5.44E-01       | 0.08                       |
| sf0431018718 | 4   | 31018718 | 5.73E-01       | 0.07                       |
| sf0431027055 | 4   | 31027055 | 6.08E-01       | 0.06                       |
| sf0431020128 | 4   | 31020128 | 8.78E-01       | 0.01                       |

\**R*<sup>2</sup> (%), proportion of variation explained by a SNP, calculated as SS of a lead SNP (after fitting all other model terms) / SS of total, where SS stands for sum of squares.

**Supplementary Table S7 Variance explained by suggestive lead SNPs.**

| Trait             | Group         | Stage               | Number of suggestive lead SNPs | Phenotypic variance explained (%) | Genetic variance explained (%) |
|-------------------|---------------|---------------------|--------------------------------|-----------------------------------|--------------------------------|
| GLAR <sub>4</sub> | Color-related | milk grain stage    | 24                             | 34.5                              | 63.89                          |
| ALWR              | shape-related | milk grain stage    | 28                             | 53.9                              | 58.59                          |
| ALA               | size-related  | milk grain stage    | 13                             | 37.6                              | 41.32                          |
| GLA <sub>2</sub>  | Color-related | ate tillering stage | 55                             | 80.4                              | 87.39                          |

**Supplementary Table S8 The heritability ( $h^2$ ) of 29 leaf traits at three growth stages.**

| <b>Stage</b>                | <b>Trait</b>      | <b>Heritability</b> |
|-----------------------------|-------------------|---------------------|
|                             | LN                | 0.80                |
|                             | GLA               | 0.71                |
|                             | GLA <sub>2</sub>  | 0.92                |
|                             | GLA <sub>3</sub>  | 0.81                |
|                             | GLA <sub>4</sub>  | 0.75                |
|                             | TLA               | 0.69                |
|                             | GLAR              | 0.90                |
|                             | GLAR <sub>2</sub> | 0.89                |
|                             | GLAR <sub>3</sub> | 0.84                |
|                             | GLAR <sub>4</sub> | 0.87                |
|                             | GLCC              | 0.81                |
|                             | LLSD              | 0.74                |
|                             | LWSD              | 0.90                |
| <b>Late tillering stage</b> | ALL               | 0.91                |
|                             | ALW               | 0.95                |
|                             | ALRA              | 0.90                |
|                             | ALWR              | 0.96                |
|                             | ALP               | 0.90                |
|                             | ALA               | 0.89                |
|                             | APAR              | 0.96                |
|                             | ALC               | 0.83                |
|                             | MLL               | 0.88                |
|                             | MLW               | 0.86                |
|                             | MLRA              | 0.84                |
|                             | MLWR              | 0.92                |
|                             | MLP               | 0.81                |
|                             | MLA               | 0.81                |
|                             | MPAR              | 0.96                |
|                             | MLC               | 0.66                |
|                             | LN                | 0.86                |
|                             | GLA               | 0.79                |
|                             | GLA <sub>2</sub>  | 0.84                |
|                             | GLA <sub>3</sub>  | 0.83                |
|                             | GLA <sub>4</sub>  | 0.80                |
|                             | TLA               | 0.79                |
|                             | GLAR              | 0.73                |
|                             | GLAR <sub>2</sub> | 0.88                |
|                             | GLAR <sub>3</sub> | 0.82                |
|                             | GLAR <sub>4</sub> | 0.78                |
|                             | GLCC              | 0.82                |
|                             | LLSD              | 0.86                |
|                             | LWSD              | 0.50                |
| <b>Late booting stage</b>   | ALL               | 0.94                |
|                             | ALW               | 0.95                |
|                             | ALRA              | 0.93                |
|                             | ALWR              | 0.98                |
|                             | ALP               | 0.94                |
|                             | ALA               | 0.93                |

|      |      |
|------|------|
| APAR | 0.97 |
| ALC  | 0.89 |
| MLL  | 0.89 |
| MLW  | 0.82 |
| MLRA | 0.85 |
| MLWR | 0.91 |
| MLP  | 0.86 |
| MLA  | 0.90 |
| MPAR | 0.92 |
| MLC  | 0.75 |

|                   |      |
|-------------------|------|
| LN                | 0.70 |
| GLA               | 0.68 |
| GLA <sub>2</sub>  | 0.80 |
| GLA <sub>3</sub>  | 0.81 |
| GLA <sub>4</sub>  | 0.51 |
| TLA               | 0.69 |
| GLAR              | 0.88 |
| GLAR <sub>2</sub> | 0.82 |
| GLAR <sub>3</sub> | 0.82 |
| GLAR <sub>4</sub> | 0.54 |
| GLCC              | 0.72 |
| LLSD              | 0.80 |
| LWSD              | 0.85 |

**Milk grain stage**

|      |      |
|------|------|
| ALL  | 0.93 |
| ALW  | 0.94 |
| ALRA | 0.92 |
| ALWR | 0.92 |
| ALP  | 0.93 |
| ALA  | 0.91 |
| APAR | 0.91 |
| ALC  | 0.83 |
| MLL  | 0.90 |
| MLW  | 0.84 |
| MLRA | 0.86 |
| MLWR | 0.90 |
| MLP  | 0.87 |
| MLA  | 0.88 |
| MPAR | 0.89 |
| MLC  | 0.81 |

---

**Supplementary Table S9 Epistasis analysis of significant lead SNPs.**

| SNP1         | SNP2         | P         | Trait            | stage                |
|--------------|--------------|-----------|------------------|----------------------|
| sf0700219702 | sf0502421097 | 8.088e-16 | GLA <sub>2</sub> | late tillering stage |
| sf0700219702 | sf0804368745 | 1.396e-12 | GLA <sub>2</sub> | late tillering stage |
| sf0700219702 | sf0905443985 | 3.916e-10 | GLA <sub>2</sub> | late tillering stage |
| sf0700219702 | sf0305695371 | 7.677e-24 | GLA <sub>2</sub> | late tillering stage |
| sf0700219702 | sf0207484769 | 6.835e-11 | GLA <sub>2</sub> | late tillering stage |
| sf0700219702 | sf0711200104 | 6.066e-39 | GLA <sub>2</sub> | late tillering stage |
| sf0700219702 | sf0513728565 | 1.336e-24 | GLA <sub>2</sub> | late tillering stage |
| sf0700219702 | sf0313954229 | 3.569e-40 | GLA <sub>2</sub> | late tillering stage |
| sf0700219702 | sf0516433687 | 1.753e-13 | GLA <sub>2</sub> | late tillering stage |
| sf0700219702 | sf0525748215 | 2.943e-17 | GLA <sub>2</sub> | late tillering stage |
| sf0700219702 | sf0826476003 | 3.467e-05 | GLA <sub>2</sub> | late tillering stage |
| sf0700219702 | sf0331940902 | 5.059e-23 | GLA <sub>2</sub> | late tillering stage |
| sf0700219702 | sf0137212688 | 1.272e-43 | GLA <sub>2</sub> | late tillering stage |
| sf0700219702 | sf1022775806 | 1.155e-14 | GLA <sub>2</sub> | late tillering stage |
| sf0700219702 | sf1202270243 | 1.04e-40  | GLA <sub>2</sub> | late tillering stage |
| sf0700219702 | sf1215668235 | 5.128e-26 | GLA <sub>2</sub> | late tillering stage |
| sf0502421097 | sf0804368745 | 5.972e-14 | GLA <sub>2</sub> | late tillering stage |
| sf0502421097 | sf0905443985 | 2.455e-09 | GLA <sub>2</sub> | late tillering stage |
| sf0502421097 | sf0305695371 | 8.431e-07 | GLA <sub>2</sub> | late tillering stage |
| sf0502421097 | sf0711200104 | 1.716e-15 | GLA <sub>2</sub> | late tillering stage |
| sf0502421097 | sf0513728565 | 1.489e-07 | GLA <sub>2</sub> | late tillering stage |
| sf0502421097 | sf0313954229 | 4.535e-07 | GLA <sub>2</sub> | late tillering stage |
| sf0502421097 | sf0516433687 | 6.678e-05 | GLA <sub>2</sub> | late tillering stage |
| sf0502421097 | sf0826476003 | 2.374e-14 | GLA <sub>2</sub> | late tillering stage |
| sf0502421097 | sf0137212688 | 4.999e-15 | GLA <sub>2</sub> | late tillering stage |
| sf0502421097 | sf1202270243 | 3.195e-08 | GLA <sub>2</sub> | late tillering stage |
| sf0502421097 | sf1215668235 | 4.528e-09 | GLA <sub>2</sub> | late tillering stage |
| sf0502421097 | sf1224620960 | 4.959e-11 | GLA <sub>2</sub> | late tillering stage |
| sf0804368745 | sf0905443985 | 1.638e-10 | GLA <sub>2</sub> | late tillering stage |
| sf0804368745 | sf0305695371 | 8.15e-05  | GLA <sub>2</sub> | late tillering stage |
| sf0804368745 | sf0406027943 | 1.655e-17 | GLA <sub>2</sub> | late tillering stage |
| sf0804368745 | sf0207484769 | 3.296e-18 | GLA <sub>2</sub> | late tillering stage |
| sf0804368745 | sf0513728565 | 2.731e-12 | GLA <sub>2</sub> | late tillering stage |
| sf0804368745 | sf0516433687 | 1.561e-24 | GLA <sub>2</sub> | late tillering stage |
| sf0804368745 | sf0525748215 | 3.544e-14 | GLA <sub>2</sub> | late tillering stage |
| sf0804368745 | sf0630583038 | 1.698e-22 | GLA <sub>2</sub> | late tillering stage |
| sf0804368745 | sf1022775806 | 1.831e-20 | GLA <sub>2</sub> | late tillering stage |
| sf0804368745 | sf1126753044 | 6.29e-09  | GLA <sub>2</sub> | late tillering stage |
| sf0804368745 | sf1215668235 | 2.136e-18 | GLA <sub>2</sub> | late tillering stage |
| sf0804368745 | sf1224620960 | 8.5e-18   | GLA <sub>2</sub> | late tillering stage |
| sf0905443985 | sf0305695371 | 5.328e-17 | GLA <sub>2</sub> | late tillering stage |
| sf0905443985 | sf0406027943 | 8.232e-06 | GLA <sub>2</sub> | late tillering stage |
| sf0905443985 | sf0711200104 | 7.869e-33 | GLA <sub>2</sub> | late tillering stage |
| sf0905443985 | sf0513728565 | 6.799e-06 | GLA <sub>2</sub> | late tillering stage |
| sf0905443985 | sf0313954229 | 1.221e-13 | GLA <sub>2</sub> | late tillering stage |



|              |              |           |                  |                      |
|--------------|--------------|-----------|------------------|----------------------|
| sf0905443985 | sf0516433687 | 6.304e-06 | GLA <sub>2</sub> | late tillering stage |
| sf0905443985 | sf0525748215 | 5.558e-05 | GLA <sub>2</sub> | late tillering stage |
| sf0905443985 | sf0826476003 | 8.364e-18 | GLA <sub>2</sub> | late tillering stage |
| sf0905443985 | sf0630583038 | 7.75e-05  | GLA <sub>2</sub> | late tillering stage |
| sf0905443985 | sf0331940902 | 2.817e-23 | GLA <sub>2</sub> | late tillering stage |
| sf0905443985 | sf0137212688 | 1.44e-41  | GLA <sub>2</sub> | late tillering stage |
| sf0905443985 | sf1022775806 | 6.73e-12  | GLA <sub>2</sub> | late tillering stage |
| sf0905443985 | sf1202270243 | 9.506e-37 | GLA <sub>2</sub> | late tillering stage |
| sf0905443985 | sf1215668235 | 3.428e-10 | GLA <sub>2</sub> | late tillering stage |
| sf0905443985 | sf1224620960 | 3.099e-07 | GLA <sub>2</sub> | late tillering stage |
| sf0305695371 | sf0406027943 | 5.25e-24  | GLA <sub>2</sub> | late tillering stage |
| sf0305695371 | sf0516433687 | 5.035e-08 | GLA <sub>2</sub> | late tillering stage |
| sf0305695371 | sf0630583038 | 2.839e-36 | GLA <sub>2</sub> | late tillering stage |
| sf0305695371 | sf1022775806 | 2.95e-19  | GLA <sub>2</sub> | late tillering stage |
| sf0305695371 | sf1126753044 | 8.503e-24 | GLA <sub>2</sub> | late tillering stage |
| sf0305695371 | sf1215668235 | 5.931e-06 | GLA <sub>2</sub> | late tillering stage |
| sf0305695371 | sf1224620960 | 1.24e-16  | GLA <sub>2</sub> | late tillering stage |
| sf0406027943 | sf0207484769 | 3.635e-16 | GLA <sub>2</sub> | late tillering stage |
| sf0406027943 | sf0711200104 | 3.319e-29 | GLA <sub>2</sub> | late tillering stage |
| sf0406027943 | sf0513728565 | 2.544e-17 | GLA <sub>2</sub> | late tillering stage |
| sf0406027943 | sf0313954229 | 4.92e-38  | GLA <sub>2</sub> | late tillering stage |
| sf0406027943 | sf0516433687 | 3.444e-13 | GLA <sub>2</sub> | late tillering stage |
| sf0406027943 | sf0525748215 | 2.713e-16 | GLA <sub>2</sub> | late tillering stage |
| sf0406027943 | sf0826476003 | 4.34e-09  | GLA <sub>2</sub> | late tillering stage |
| sf0406027943 | sf0331940902 | 1.625e-22 | GLA <sub>2</sub> | late tillering stage |
| sf0406027943 | sf0137212688 | 5.675e-41 | GLA <sub>2</sub> | late tillering stage |
| sf0406027943 | sf1202270243 | 8.976e-32 | GLA <sub>2</sub> | late tillering stage |
| sf0406027943 | sf1215668235 | 2.958e-23 | GLA <sub>2</sub> | late tillering stage |
| sf0207484769 | sf0711200104 | 5.007e-07 | GLA <sub>2</sub> | late tillering stage |
| sf0207484769 | sf0313954229 | 1.29e-05  | GLA <sub>2</sub> | late tillering stage |
| sf0207484769 | sf0630583038 | 2.744e-16 | GLA <sub>2</sub> | late tillering stage |
| sf0207484769 | sf0331940902 | 2.012e-08 | GLA <sub>2</sub> | late tillering stage |
| sf0207484769 | sf0137212688 | 4.855e-08 | GLA <sub>2</sub> | late tillering stage |
| sf0207484769 | sf1022775806 | 4.585e-13 | GLA <sub>2</sub> | late tillering stage |
| sf0207484769 | sf1126753044 | 4.343e-16 | GLA <sub>2</sub> | late tillering stage |
| sf0207484769 | sf1215668235 | 1.05e-16  | GLA <sub>2</sub> | late tillering stage |
| sf0207484769 | sf1224620960 | 2.462e-16 | GLA <sub>2</sub> | late tillering stage |
| sf0711200104 | sf0513728565 | 1.328e-26 | GLA <sub>2</sub> | late tillering stage |
| sf0711200104 | sf0516433687 | 5.346e-20 | GLA <sub>2</sub> | late tillering stage |
| sf0711200104 | sf0525748215 | 9.45e-12  | GLA <sub>2</sub> | late tillering stage |
| sf0711200104 | sf0826476003 | 8.062e-13 | GLA <sub>2</sub> | late tillering stage |
| sf0711200104 | sf0630583038 | 1.003e-33 | GLA <sub>2</sub> | late tillering stage |
| sf0711200104 | sf1022775806 | 2.112e-37 | GLA <sub>2</sub> | late tillering stage |
| sf0711200104 | sf1126753044 | 3.782e-22 | GLA <sub>2</sub> | late tillering stage |
| sf0711200104 | sf1215668235 | 4.195e-27 | GLA <sub>2</sub> | late tillering stage |
| sf0711200104 | sf1224620960 | 7.759e-39 | GLA <sub>2</sub> | late tillering stage |
| sf0513728565 | sf0313954229 | 5.827e-06 | GLA <sub>2</sub> | late tillering stage |
| sf0513728565 | sf0516433687 | 9.329e-08 | GLA <sub>2</sub> | late tillering stage |

|              |              |           |                  |                      |
|--------------|--------------|-----------|------------------|----------------------|
| sf0513728565 | sf0826476003 | 2.762e-12 | GLA <sub>2</sub> | late tillering stage |
| sf0513728565 | sf0630583038 | 1.176e-22 | GLA <sub>2</sub> | late tillering stage |
| sf0513728565 | sf0331940902 | 1.95e-26  | GLA <sub>2</sub> | late tillering stage |
| sf0513728565 | sf0137212688 | 1.192e-45 | GLA <sub>2</sub> | late tillering stage |
| sf0513728565 | sf1022775806 | 3.782e-22 | GLA <sub>2</sub> | late tillering stage |
| sf0513728565 | sf1126753044 | 6.546e-25 | GLA <sub>2</sub> | late tillering stage |
| sf0513728565 | sf1202270243 | 7.396e-20 | GLA <sub>2</sub> | late tillering stage |
| sf0513728565 | sf1215668235 | 8.233e-27 | GLA <sub>2</sub> | late tillering stage |
| sf0513728565 | sf1224620960 | 3.128e-16 | GLA <sub>2</sub> | late tillering stage |
| sf0313954229 | sf0525748215 | 4.929e-06 | GLA <sub>2</sub> | late tillering stage |
| sf0313954229 | sf0630583038 | 1.428e-37 | GLA <sub>2</sub> | late tillering stage |
| sf0313954229 | sf1022775806 | 4.579e-22 | GLA <sub>2</sub> | late tillering stage |
| sf0313954229 | sf1126753044 | 8.938e-25 | GLA <sub>2</sub> | late tillering stage |
| sf0313954229 | sf1215668235 | 9.5e-21   | GLA <sub>2</sub> | late tillering stage |
| sf0313954229 | sf1224620960 | 3.653e-26 | GLA <sub>2</sub> | late tillering stage |
| sf0516433687 | sf0525748215 | 4.815e-18 | GLA <sub>2</sub> | late tillering stage |
| sf0516433687 | sf0826476003 | 7.36e-12  | GLA <sub>2</sub> | late tillering stage |
| sf0516433687 | sf0630583038 | 6.022e-13 | GLA <sub>2</sub> | late tillering stage |
| sf0516433687 | sf0331940902 | 2.666e-08 | GLA <sub>2</sub> | late tillering stage |
| sf0516433687 | sf0137212688 | 6.886e-05 | GLA <sub>2</sub> | late tillering stage |
| sf0516433687 | sf1022775806 | 3.904e-14 | GLA <sub>2</sub> | late tillering stage |
| sf0516433687 | sf1126753044 | 1.619e-15 | GLA <sub>2</sub> | late tillering stage |
| sf0516433687 | sf1202270243 | 1.301e-10 | GLA <sub>2</sub> | late tillering stage |
| sf0516433687 | sf1215668235 | 1.723e-08 | GLA <sub>2</sub> | late tillering stage |
| sf0516433687 | sf1224620960 | 1.669e-13 | GLA <sub>2</sub> | late tillering stage |
| sf0525748215 | sf0826476003 | 6.431e-08 | GLA <sub>2</sub> | late tillering stage |
| sf0525748215 | sf0630583038 | 1.91e-16  | GLA <sub>2</sub> | late tillering stage |
| sf0525748215 | sf0331940902 | 6.115e-27 | GLA <sub>2</sub> | late tillering stage |
| sf0525748215 | sf0137212688 | 1.898e-26 | GLA <sub>2</sub> | late tillering stage |
| sf0525748215 | sf1022775806 | 1.466e-16 | GLA <sub>2</sub> | late tillering stage |
| sf0525748215 | sf1126753044 | 2.913e-16 | GLA <sub>2</sub> | late tillering stage |
| sf0525748215 | sf1202270243 | 1.417e-06 | GLA <sub>2</sub> | late tillering stage |
| sf0525748215 | sf1215668235 | 6.802e-17 | GLA <sub>2</sub> | late tillering stage |
| sf0525748215 | sf1224620960 | 1.659e-16 | GLA <sub>2</sub> | late tillering stage |
| sf0826476003 | sf0630583038 | 3.014e-07 | GLA <sub>2</sub> | late tillering stage |
| sf0826476003 | sf1022775806 | 8.513e-22 | GLA <sub>2</sub> | late tillering stage |
| sf0826476003 | sf1126753044 | 9.784e-08 | GLA <sub>2</sub> | late tillering stage |
| sf0826476003 | sf1215668235 | 2.842e-26 | GLA <sub>2</sub> | late tillering stage |
| sf0826476003 | sf1224620960 | 1.412e-13 | GLA <sub>2</sub> | late tillering stage |
| sf0630583038 | sf0331940902 | 2.397e-22 | GLA <sub>2</sub> | late tillering stage |
| sf0630583038 | sf0137212688 | 7.783e-41 | GLA <sub>2</sub> | late tillering stage |
| sf0630583038 | sf1202270243 | 1.01e-37  | GLA <sub>2</sub> | late tillering stage |
| sf0630583038 | sf1215668235 | 2.633e-09 | GLA <sub>2</sub> | late tillering stage |
| sf0331940902 | sf1022775806 | 1.268e-15 | GLA <sub>2</sub> | late tillering stage |
| sf0331940902 | sf1126753044 | 1.726e-12 | GLA <sub>2</sub> | late tillering stage |
| sf0331940902 | sf1215668235 | 4.245e-09 | GLA <sub>2</sub> | late tillering stage |
| sf0331940902 | sf1224620960 | 6.369e-23 | GLA <sub>2</sub> | late tillering stage |
| sf0137212688 | sf1022775806 | 7.928e-41 | GLA <sub>2</sub> | late tillering stage |

|              |              |           |                   |                      |
|--------------|--------------|-----------|-------------------|----------------------|
| sf0137212688 | sf1126753044 | 2.745e-27 | GLA <sub>2</sub>  | late tillering stage |
| sf0137212688 | sf1215668235 | 1.44e-22  | GLA <sub>2</sub>  | late tillering stage |
| sf0137212688 | sf1224620960 | 1.1e-41   | GLA <sub>2</sub>  | late tillering stage |
| sf1022775806 | sf1202270243 | 1.151e-25 | GLA <sub>2</sub>  | late tillering stage |
| sf1022775806 | sf1215668235 | 8.45e-09  | GLA <sub>2</sub>  | late tillering stage |
| sf1022775806 | sf1224620960 | 8.905e-09 | GLA <sub>2</sub>  | late tillering stage |
| sf1126753044 | sf1202270243 | 1.03e-17  | GLA <sub>2</sub>  | late tillering stage |
| sf1126753044 | sf1215668235 | 4.314e-13 | GLA <sub>2</sub>  | late tillering stage |
| sf1202270243 | sf1215668235 | 3.885e-10 | GLA <sub>2</sub>  | late tillering stage |
| sf1202270243 | sf1224620960 | 5.666e-28 | GLA <sub>2</sub>  | late tillering stage |
| sf1215668235 | sf1224620960 | 1.791e-24 | GLA <sub>2</sub>  | late tillering stage |
| sf0606820810 | sf1127580568 | 1.193e-10 | LWSD              | late tillering stage |
| sf0514011442 | sf1127580568 | 1.606e-10 | LWSD              | late tillering stage |
| sf0528903428 | sf1127580568 | 2.94e-10  | LWSD              | late tillering stage |
| sf0405015647 | sf0622511851 | 9.805e-05 | GLAR <sub>4</sub> | milk grain stage     |
| sf0620800068 | sf1212008851 | 4.921e-05 | GLAR <sub>4</sub> | milk grain stage     |
| sf0702345742 | sf0719554750 | 7.036e-18 | LWSD              | milk grain stage     |
| sf0719554750 | sf1126108571 | 4.765e-10 | LWSD              | milk grain stage     |
| sf0401199801 | sf1102574411 | 8.068e-07 | APAR              | milk grain stage     |
| sf0305756733 | sf1102574411 | 4.786e-07 | APAR              | milk grain stage     |
| sf0114790584 | sf0141826241 | 7.948e-07 | APAR              | milk grain stage     |
| sf0114790584 | sf1102574411 | 7.465e-18 | APAR              | milk grain stage     |

---
